# Supplementary material for: Rapid and ongoing evolution of repetitive sequence structures in human centromeres
Source: PubMed Central journal article supplement — Sci Adv. 2020 Dec 11;6(50):eabd9230. doi: 10.1126/sciadv.abd9230 (PMC7732198; doi:10.1126/sciadv.abd9230), 2020-12-11
Supplement: abd9230_SM.pdf [file abd9230_SM.pdf]

## Supplementary Materials for

### **Rapid and ongoing evolution of repetitive sequence structures in human centromeres**

Yuta Suzuki\*, Eugene W. Myers, Shinichi Morishita\*

\*Corresponding author. Email: [yuta\\_suzuki@edu.k.u-tokyo.ac.jp](mailto:yuta_suzuki@edu.k.u-tokyo.ac.jp) (Y.S.); [moris@edu.k.u-tokyo.ac.jp](mailto:moris@edu.k.u-tokyo.ac.jp) (S.M.)

Published 11 December 2020, *Sci. Adv.* **6**, eabd9230 (2020)

DOI: 10.1126/sciadv.abd9230

#### **The PDF file includes:**

Materials and Methods  
Figs. S1 to S20  
Tables S1 to S3  
Legends for data files S1 to S4

#### **Other Supplementary Material for this manuscript includes the following:**

(available at [advances.sciencemag.org/cgi/content/full/6/50/eabd9230/DC1](https://advances.sciencemag.org/cgi/content/full/6/50/eabd9230/DC1))

Data files S1 to S4

**A**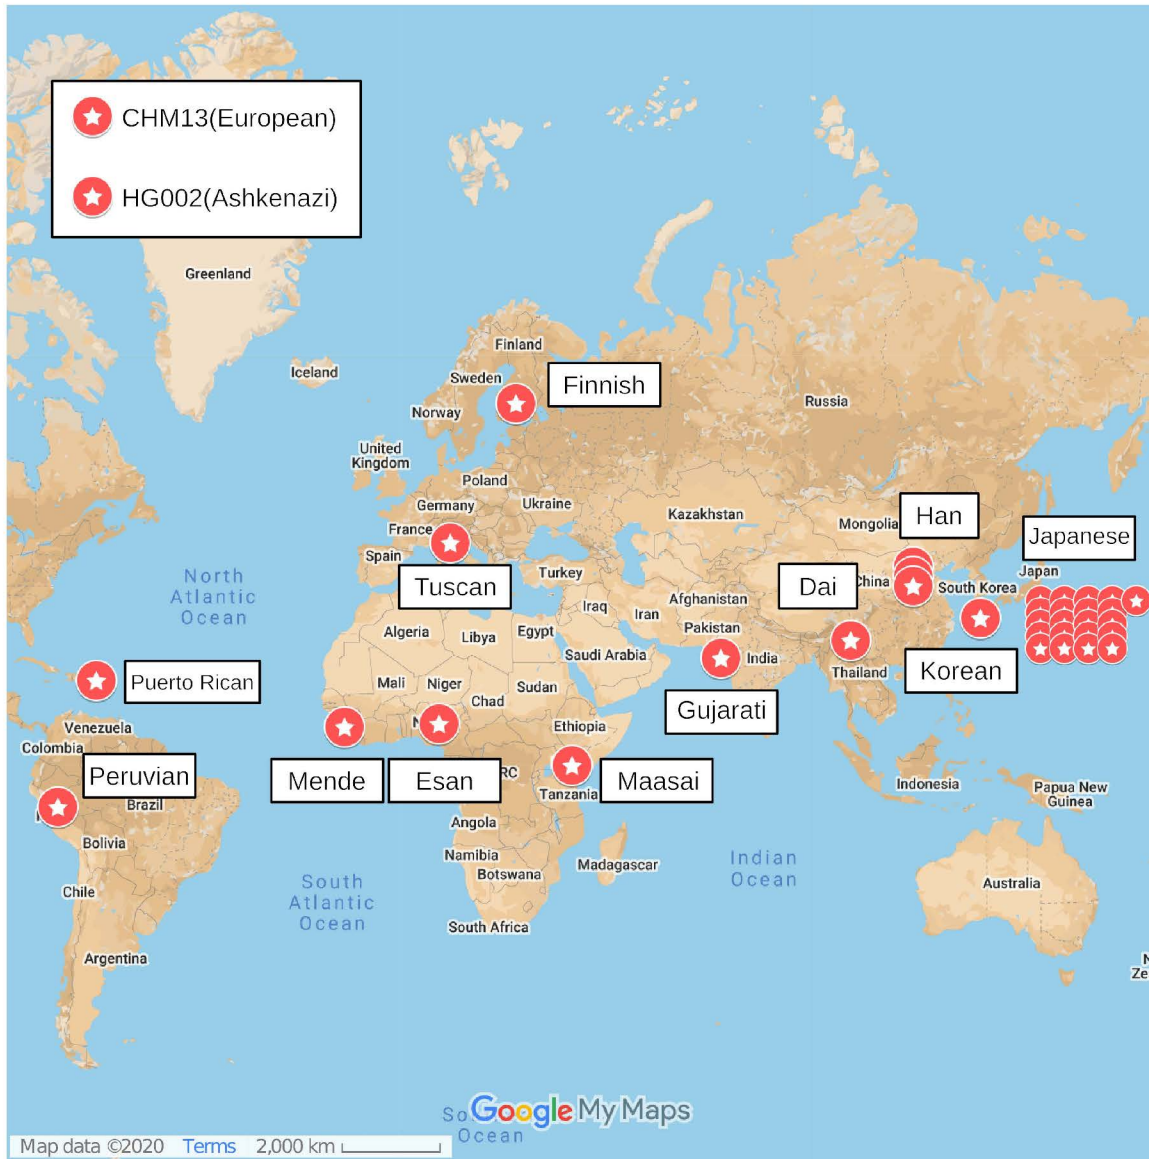**B**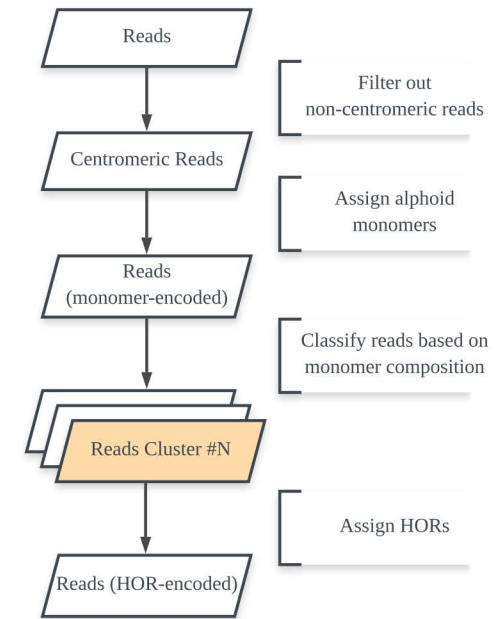**C**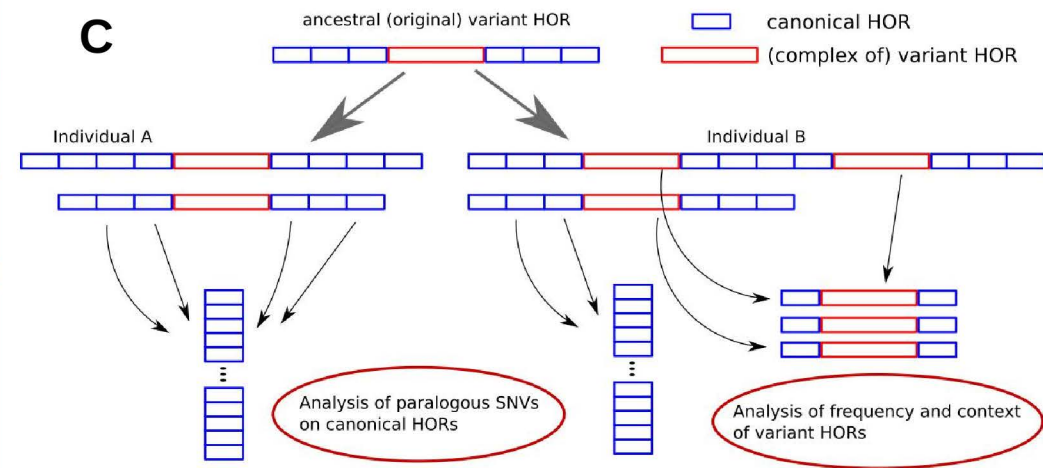**Fig S1. Summary of study design.**

(A) Geographic locations of samples.

(B) Stepwise encoding strategy, specifically for the HOR analysis via long reads.

(C) In exploring tandem repeats, all homologous (orthologs/paralogs, if it applies at all) elements must be considered equally important.

## HOR-SV

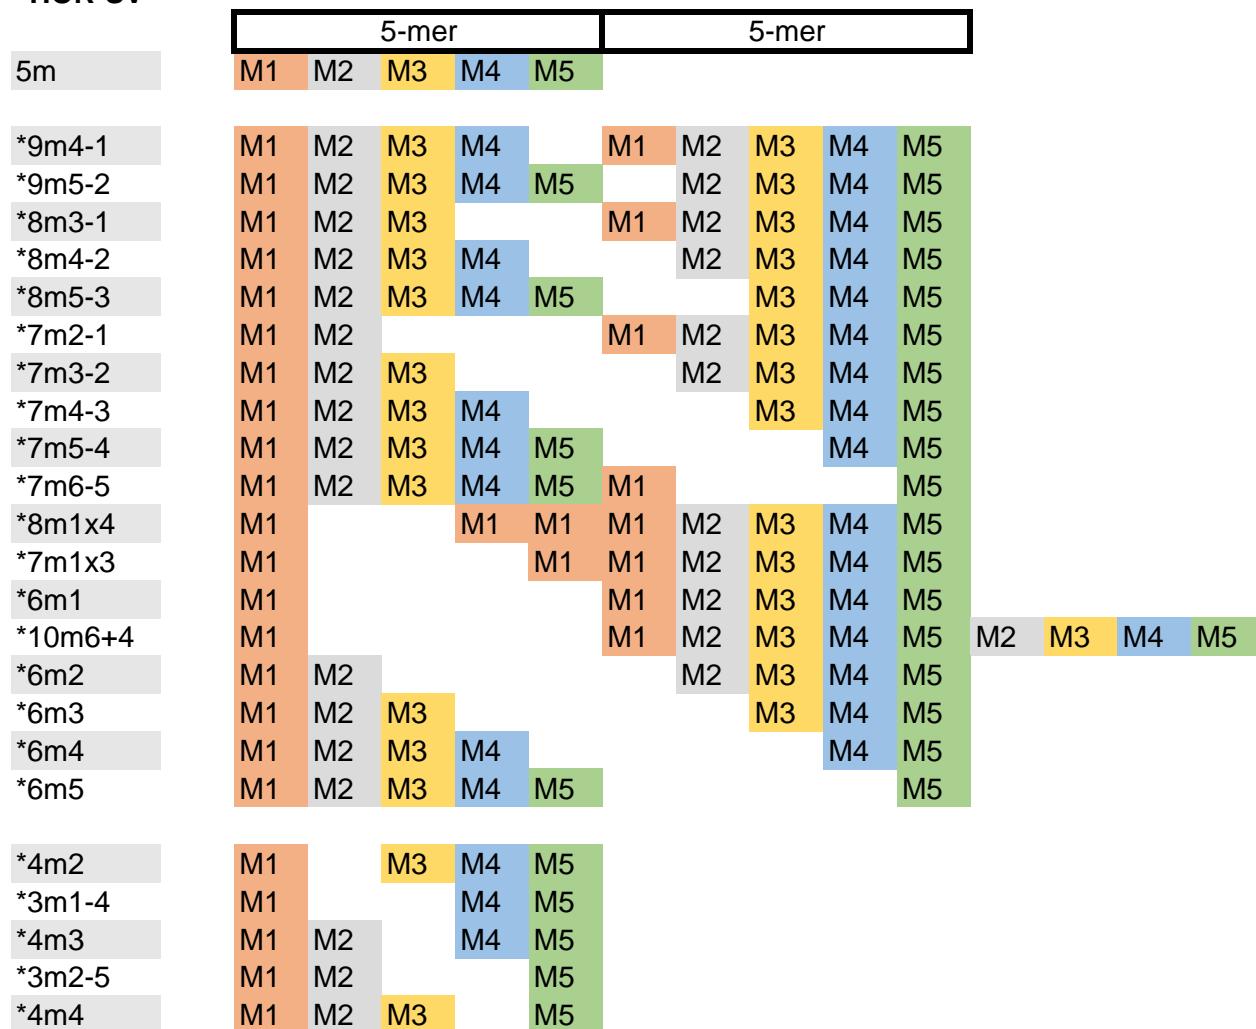

**Fig S2. Detected HORs in chr11.** The structure of HORs are presented in each row. The rectangles represent the presence of aliphoid monomers, whose classes are written on the rectangles. For example, variant HOR named "4m2" is characterized by deletion of the second monomer, resulting in the 4-mer HOR variant. No gap is allowed between two adjacent monomers to be detected as a variant HOR unit.

**HOR-SV**

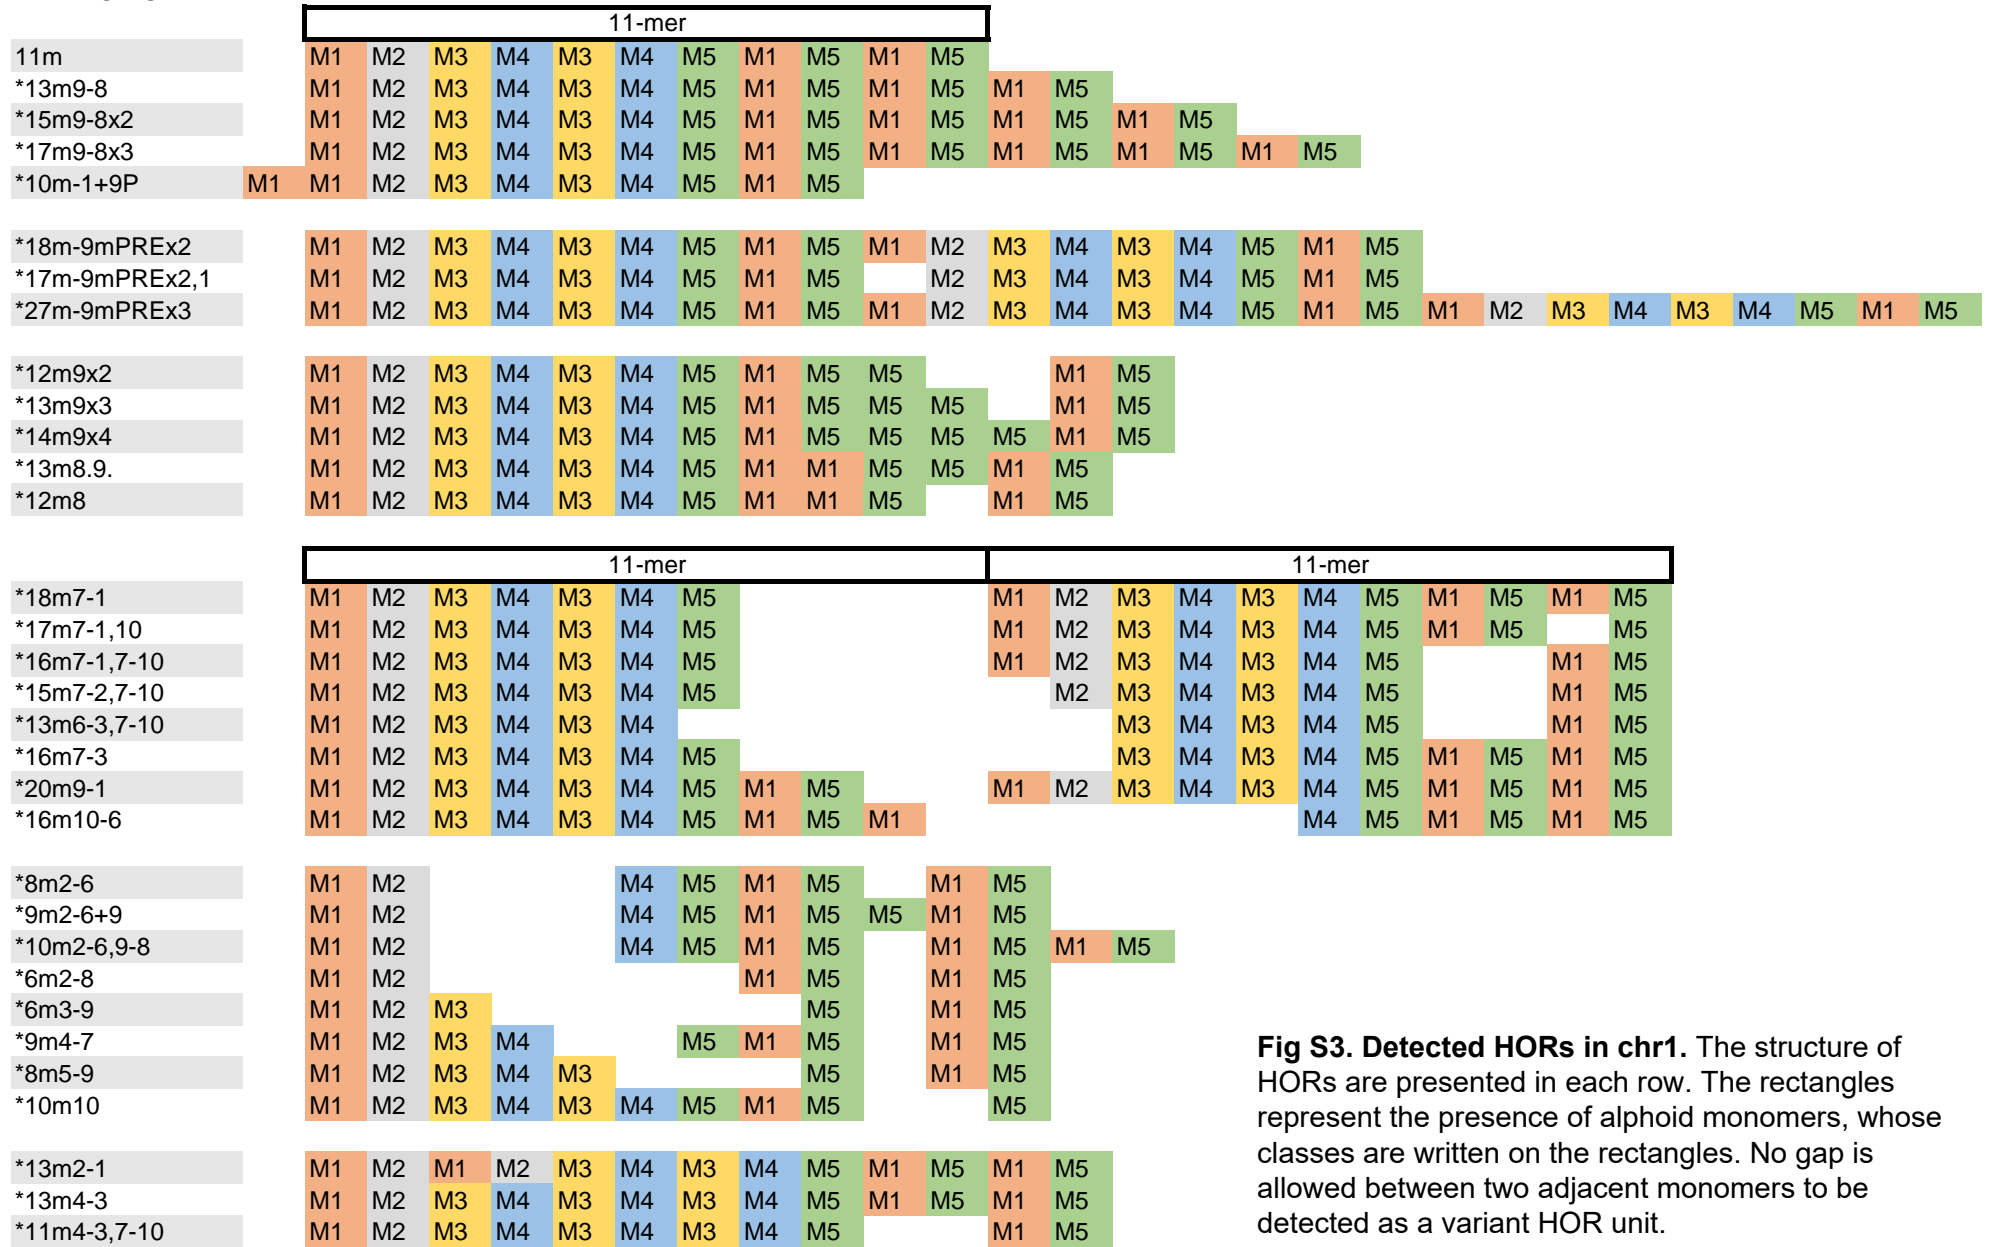

**Fig S3. Detected HORs in chr1.** The structure of HORs are presented in each row. The rectangles represent the presence of alphoid monomers, whose classes are written on the rectangles. No gap is allowed between two adjacent monomers to be detected as a variant HOR unit.

HOR-SV

|           | 12-mer |    |    |    |    |    |    |    |    |    |    | 12-mer |    |    |    |    |    |    |    |    |    |    |    |    |    |  |  |
|-----------|--------|----|----|----|----|----|----|----|----|----|----|--------|----|----|----|----|----|----|----|----|----|----|----|----|----|--|--|
| 12m       | M1     | M2 | M3 | M4 | M5 | M1 | M2 | M3 | M4 | M3 | M4 | M5     |    |    |    |    |    |    |    |    |    |    |    |    |    |  |  |
| 12m1      | M3     | M2 | M3 | M4 | M5 | M1 | M2 | M3 | M4 | M3 | M4 | M5     |    |    |    |    |    |    |    |    |    |    |    |    |    |  |  |
| 12m3      | M1     | M2 | M1 | M4 | M5 | M1 | M2 | M3 | M4 | M3 | M4 | M5     |    |    |    |    |    |    |    |    |    |    |    |    |    |  |  |
| *14m2-1   | M1     | M2 |    |    |    |    |    |    |    |    |    |        | M1 | M2 | M3 | M4 | M3 | M4 | M5 |    |    |    |    |    |    |  |  |
| *14m6-5   | M1     | M2 | M3 | M4 | M5 | M1 |    |    |    |    |    |        | M5 | M1 | M2 | M3 | M4 | M3 | M4 | M5 |    |    |    |    |    |  |  |
| *14m7-6   | M1     | M2 | M3 | M4 | M5 | M1 | M2 |    |    |    |    |        |    | M1 | M2 | M3 | M4 | M3 | M4 | M5 |    |    |    |    |    |  |  |
| *20m9-2   | M1     | M2 | M3 | M4 | M5 | M1 | M2 | M3 | M4 |    |    |        | M2 | M3 | M4 | M5 | M1 | M2 | M3 | M4 | M3 | M4 | M5 |    |    |  |  |
| *17m5-1   | M1     | M2 | M3 | M4 | M5 | M1 | M2 | M3 | M4 |    |    |        | M5 | M1 | M2 | M3 | M4 | M3 | M4 | M5 |    |    |    |    |    |  |  |
| *16m9-6   | M1     | M2 | M3 | M4 | M5 | M1 | M2 | M3 | M4 |    |    |        |    | M1 | M2 | M3 | M4 | M3 | M4 | M5 |    |    |    |    |    |  |  |
| *20m10-3  | M1     | M2 | M3 | M4 | M5 | M1 | M2 | M3 | M4 | M3 |    |        |    | M3 | M4 | M5 | M1 | M2 | M3 | M4 | M3 | M4 | M5 |    |    |  |  |
| *23m11-1  | M1     | M2 | M3 | M4 | M5 | M1 | M2 | M3 | M4 | M3 | M4 |        |    | M1 | M2 | M3 | M4 | M3 | M4 | M5 |    |    |    |    |    |  |  |
| *22m11-2  | M1     | M2 | M3 | M4 | M5 | M1 | M2 | M3 | M4 | M3 | M4 |        |    | M2 | M3 | M4 | M5 | M1 | M2 | M3 | M4 | M3 | M4 | M5 |    |  |  |
| *21m11-3  | M1     | M2 | M3 | M4 | M5 | M1 | M2 | M3 | M4 | M3 | M4 |        |    | M3 | M4 | M5 | M1 | M2 | M3 | M4 | M3 | M4 | M5 |    |    |  |  |
| *18m11-6  | M1     | M2 | M3 | M4 | M5 | M1 | M2 | M3 | M4 | M3 | M4 |        |    |    |    |    | M1 | M2 | M3 | M4 | M3 | M4 | M5 |    |    |  |  |
| *17m11-7  | M1     | M2 | M3 | M4 | M5 | M1 | M2 | M3 | M4 | M3 | M4 |        |    |    |    |    | M2 | M3 | M4 | M3 | M4 | M5 |    |    |    |  |  |
| *15m11-9  | M1     | M2 | M3 | M4 | M5 | M1 | M2 | M3 | M4 | M3 | M4 |        |    |    |    |    |    |    | M4 | M3 | M4 | M5 |    |    |    |  |  |
| *22m12-3  | M1     | M2 | M3 | M4 | M5 | M1 | M2 | M3 | M4 | M3 | M4 | M5     |    |    | M3 | M4 | M5 | M1 | M2 | M3 | M4 | M3 | M4 | M5 |    |  |  |
| *19m12-6  | M1     | M2 | M3 | M4 | M5 | M1 | M2 | M3 | M4 | M3 | M4 | M5     |    |    |    |    |    | M1 | M2 | M3 | M4 | M3 | M4 | M5 |    |  |  |
| *15m12-10 | M1     | M2 | M3 | M4 | M5 | M1 | M2 | M3 | M4 | M3 | M4 | M5     |    |    |    |    |    |    |    |    | M3 | M4 | M5 |    |    |  |  |
| *13m4     | M1     | M2 | M3 | M4 |    |    |    |    |    |    |    |        |    |    |    |    | M4 | M5 | M1 | M2 | M3 | M4 | M3 | M4 | M5 |  |  |
| *13m5     | M1     | M2 | M3 | M4 | M5 |    |    |    |    |    |    |        |    |    |    |    | M5 | M1 | M2 | M3 | M4 | M3 | M4 | M5 |    |  |  |
| *13m6     | M1     | M2 | M3 | M4 | M5 | M1 |    |    |    |    |    |        |    |    |    |    |    | M1 | M2 | M3 | M4 | M3 | M4 | M5 |    |  |  |
| *13m7     | M1     | M2 | M3 | M4 | M5 | M1 | M2 |    |    |    |    |        |    |    |    |    |    | M2 | M3 | M4 | M3 | M4 | M5 |    |    |  |  |
| *13m8     | M1     | M2 | M3 | M4 | M5 | M1 | M2 | M3 |    |    |    |        |    |    |    |    |    |    | M3 | M4 | M3 | M4 | M5 |    |    |  |  |
| *13m9     | M1     | M2 | M3 | M4 | M5 | M1 | M2 | M3 | M4 |    |    |        |    |    |    |    |    |    |    | M4 | M3 | M4 | M5 |    |    |  |  |
| *13m10    | M1     | M2 | M3 | M4 | M5 | M1 | M2 | M3 | M4 | M3 |    |        |    |    |    |    |    |    |    |    | M3 | M4 | M5 |    |    |  |  |
| *13m11    | M1     | M2 | M3 | M4 | M5 | M1 | M2 | M3 | M4 | M3 | M4 |        |    |    |    |    |    |    |    |    |    | M4 | M5 |    |    |  |  |
| *11m11    | M1     | M2 | M3 | M4 | M5 | M1 | M2 | M3 | M4 | M3 |    | M5     |    |    |    |    |    |    |    |    |    |    |    |    |    |  |  |
| *11m10    | M1     | M2 | M3 | M4 | M5 | M1 | M2 | M3 | M4 |    | M4 | M5     |    |    |    |    |    |    |    |    |    |    |    |    |    |  |  |
| *11m9     | M1     | M2 | M3 | M4 | M5 | M1 | M2 | M3 |    | M3 | M4 | M5     |    |    |    |    |    |    |    |    |    |    |    |    |    |  |  |
| *11m8     | M1     | M2 | M3 | M4 | M5 | M1 | M2 |    | M4 | M3 | M4 | M5     |    |    |    |    |    |    |    |    |    |    |    |    |    |  |  |
| *11m7     | M1     | M2 | M3 | M4 | M5 | M1 |    | M3 | M4 | M3 | M4 | M5     |    |    |    |    |    |    |    |    |    |    |    |    |    |  |  |
| *11m6     | M1     | M2 | M3 | M4 | M5 |    | M2 | M3 | M4 | M3 | M4 | M5     |    |    |    |    |    |    |    |    |    |    |    |    |    |  |  |
| *11m4     | M1     | M2 | M3 |    | M5 | M1 | M2 | M3 | M4 | M3 | M4 | M5     |    |    |    |    |    |    |    |    |    |    |    |    |    |  |  |
| *11m3     | M1     | M2 |    | M4 | M5 | M1 | M2 | M3 | M4 | M3 | M4 | M5     |    |    |    |    |    |    |    |    |    |    |    |    |    |  |  |
| *11m2     | M1     |    | M3 | M4 | M5 | M1 | M2 | M3 | M4 | M3 | M4 | M5     |    |    |    |    |    |    |    |    |    |    |    |    |    |  |  |
| *10m1-4   | M1     |    |    | M4 | M5 | M1 | M2 | M3 | M4 | M3 | M4 | M5     |    |    |    |    |    |    |    |    |    |    |    |    |    |  |  |
| *10m2-5   | M1     | M2 |    |    | M5 | M1 | M2 | M3 | M4 | M3 | M4 | M5     |    |    |    |    |    |    |    |    |    |    |    |    |    |  |  |
| *10m3-6   | M1     | M2 | M3 |    |    | M1 | M2 | M3 | M4 | M3 | M4 | M5     |    |    |    |    |    |    |    |    |    |    |    |    |    |  |  |
| *9m3-7    | M1     | M2 | M3 |    |    |    | M2 | M3 | M4 | M3 | M4 | M5     |    |    |    |    |    |    |    |    |    |    |    |    |    |  |  |
| *9m5-9    | M1     | M2 | M3 | M4 | M5 |    |    |    | M4 | M3 | M4 | M5     |    |    |    |    |    |    |    |    |    |    |    |    |    |  |  |
| *8m5-10   | M1     | M2 | M3 | M4 | M5 |    |    |    |    | M3 | M4 | M5     |    |    |    |    |    |    |    |    |    |    |    |    |    |  |  |
| *10m6-9   | M1     | M2 | M3 | M4 | M5 | M1 |    |    | M4 | M3 | M4 | M5     |    |    |    |    |    |    |    |    |    |    |    |    |    |  |  |
| *9m6-10   | M1     | M2 | M3 | M4 | M5 | M1 |    |    |    | M3 | M4 | M5     |    |    |    |    |    |    |    |    |    |    |    |    |    |  |  |
| *9m7-11   | M1     | M2 | M3 | M4 | M5 | M1 | M2 |    |    |    | M4 | M5     |    |    |    |    |    |    |    |    |    |    |    |    |    |  |  |
| *8m7-12   | M1     | M2 | M3 | M4 | M5 | M1 | M2 |    |    |    |    | M5     |    |    |    |    |    |    |    |    |    |    |    |    |    |  |  |
| *9m8-12   | M1     | M2 | M3 | M4 | M5 | M1 | M2 | M3 |    |    |    | M5     |    |    |    |    |    |    |    |    |    |    |    |    |    |  |  |
| *5mx2     | M1     | M2 | M3 | M4 | M5 | M1 | M2 | M3 | M4 | M5 |    |        |    |    |    |    |    |    |    |    |    |    |    |    |    |  |  |
| *5mx3     | M1     | M2 | M3 | M4 | M5 | M1 | M2 | M3 | M4 | M5 | M1 | M2     | M3 | M4 | M5 |    |    |    |    |    |    |    |    |    |    |  |  |
| *4m       | M1     | M2 | M3 |    | M5 |    |    |    |    |    |    |        |    |    |    |    |    |    |    |    |    |    |    |    |    |  |  |
| *3m       | M1     | M2 |    |    | M5 |    |    |    |    |    |    |        |    |    |    |    |    |    |    |    |    |    |    |    |    |  |  |
| *2m       | M1     |    |    |    | M5 |    |    |    |    |    |    |        |    |    |    |    |    |    |    |    |    |    |    |    |    |  |  |
| *10m-POST |        |    | M3 | M4 | M5 | M1 | M2 | M3 | M4 | M3 | M4 | M5     |    |    |    |    |    |    |    |    |    |    |    |    |    |  |  |
| *7m-POST  |        |    |    |    |    | M1 | M2 | M3 | M4 | M3 | M4 | M5     |    |    |    |    |    |    |    |    |    |    |    |    |    |  |  |
| *5m-PRE   | M1     | M2 | M3 | M4 | M5 |    |    |    |    |    |    |        |    |    |    |    |    |    |    |    |    |    |    |    |    |  |  |

**Fig S4. Detected HORs in chrX.** The structure of HORs are presented in each row. The rectangles represent the presence of alphoid monomers, whose classes are written on the rectangles. No gap is allowed between two adjacent monomers to be detected as a variant HOR unit.

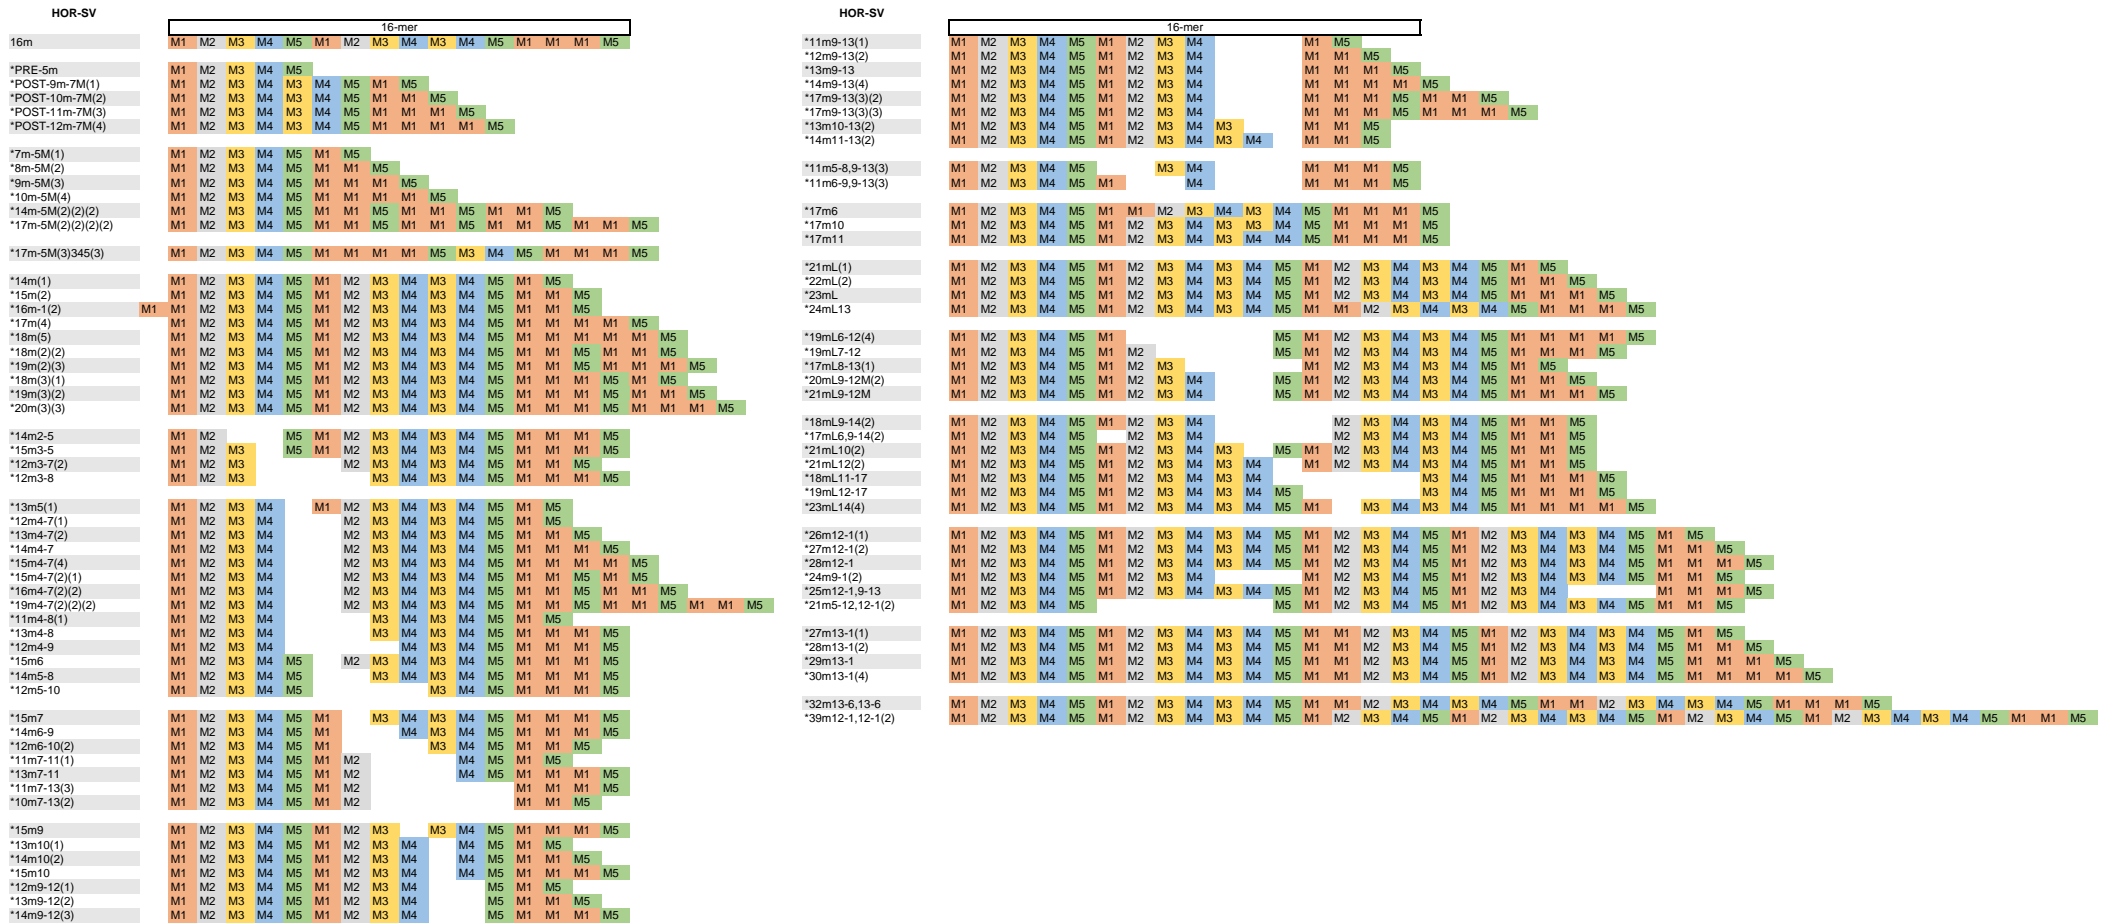

**Fig S5. Detected HORs in chr17.** The structure of HORs are presented in each row. The rectangles represent the presence of aliphoid monomers, whose classes are written on the rectangles. No gap is allowed between two adjacent monomers to be detected as a variant HOR unit.

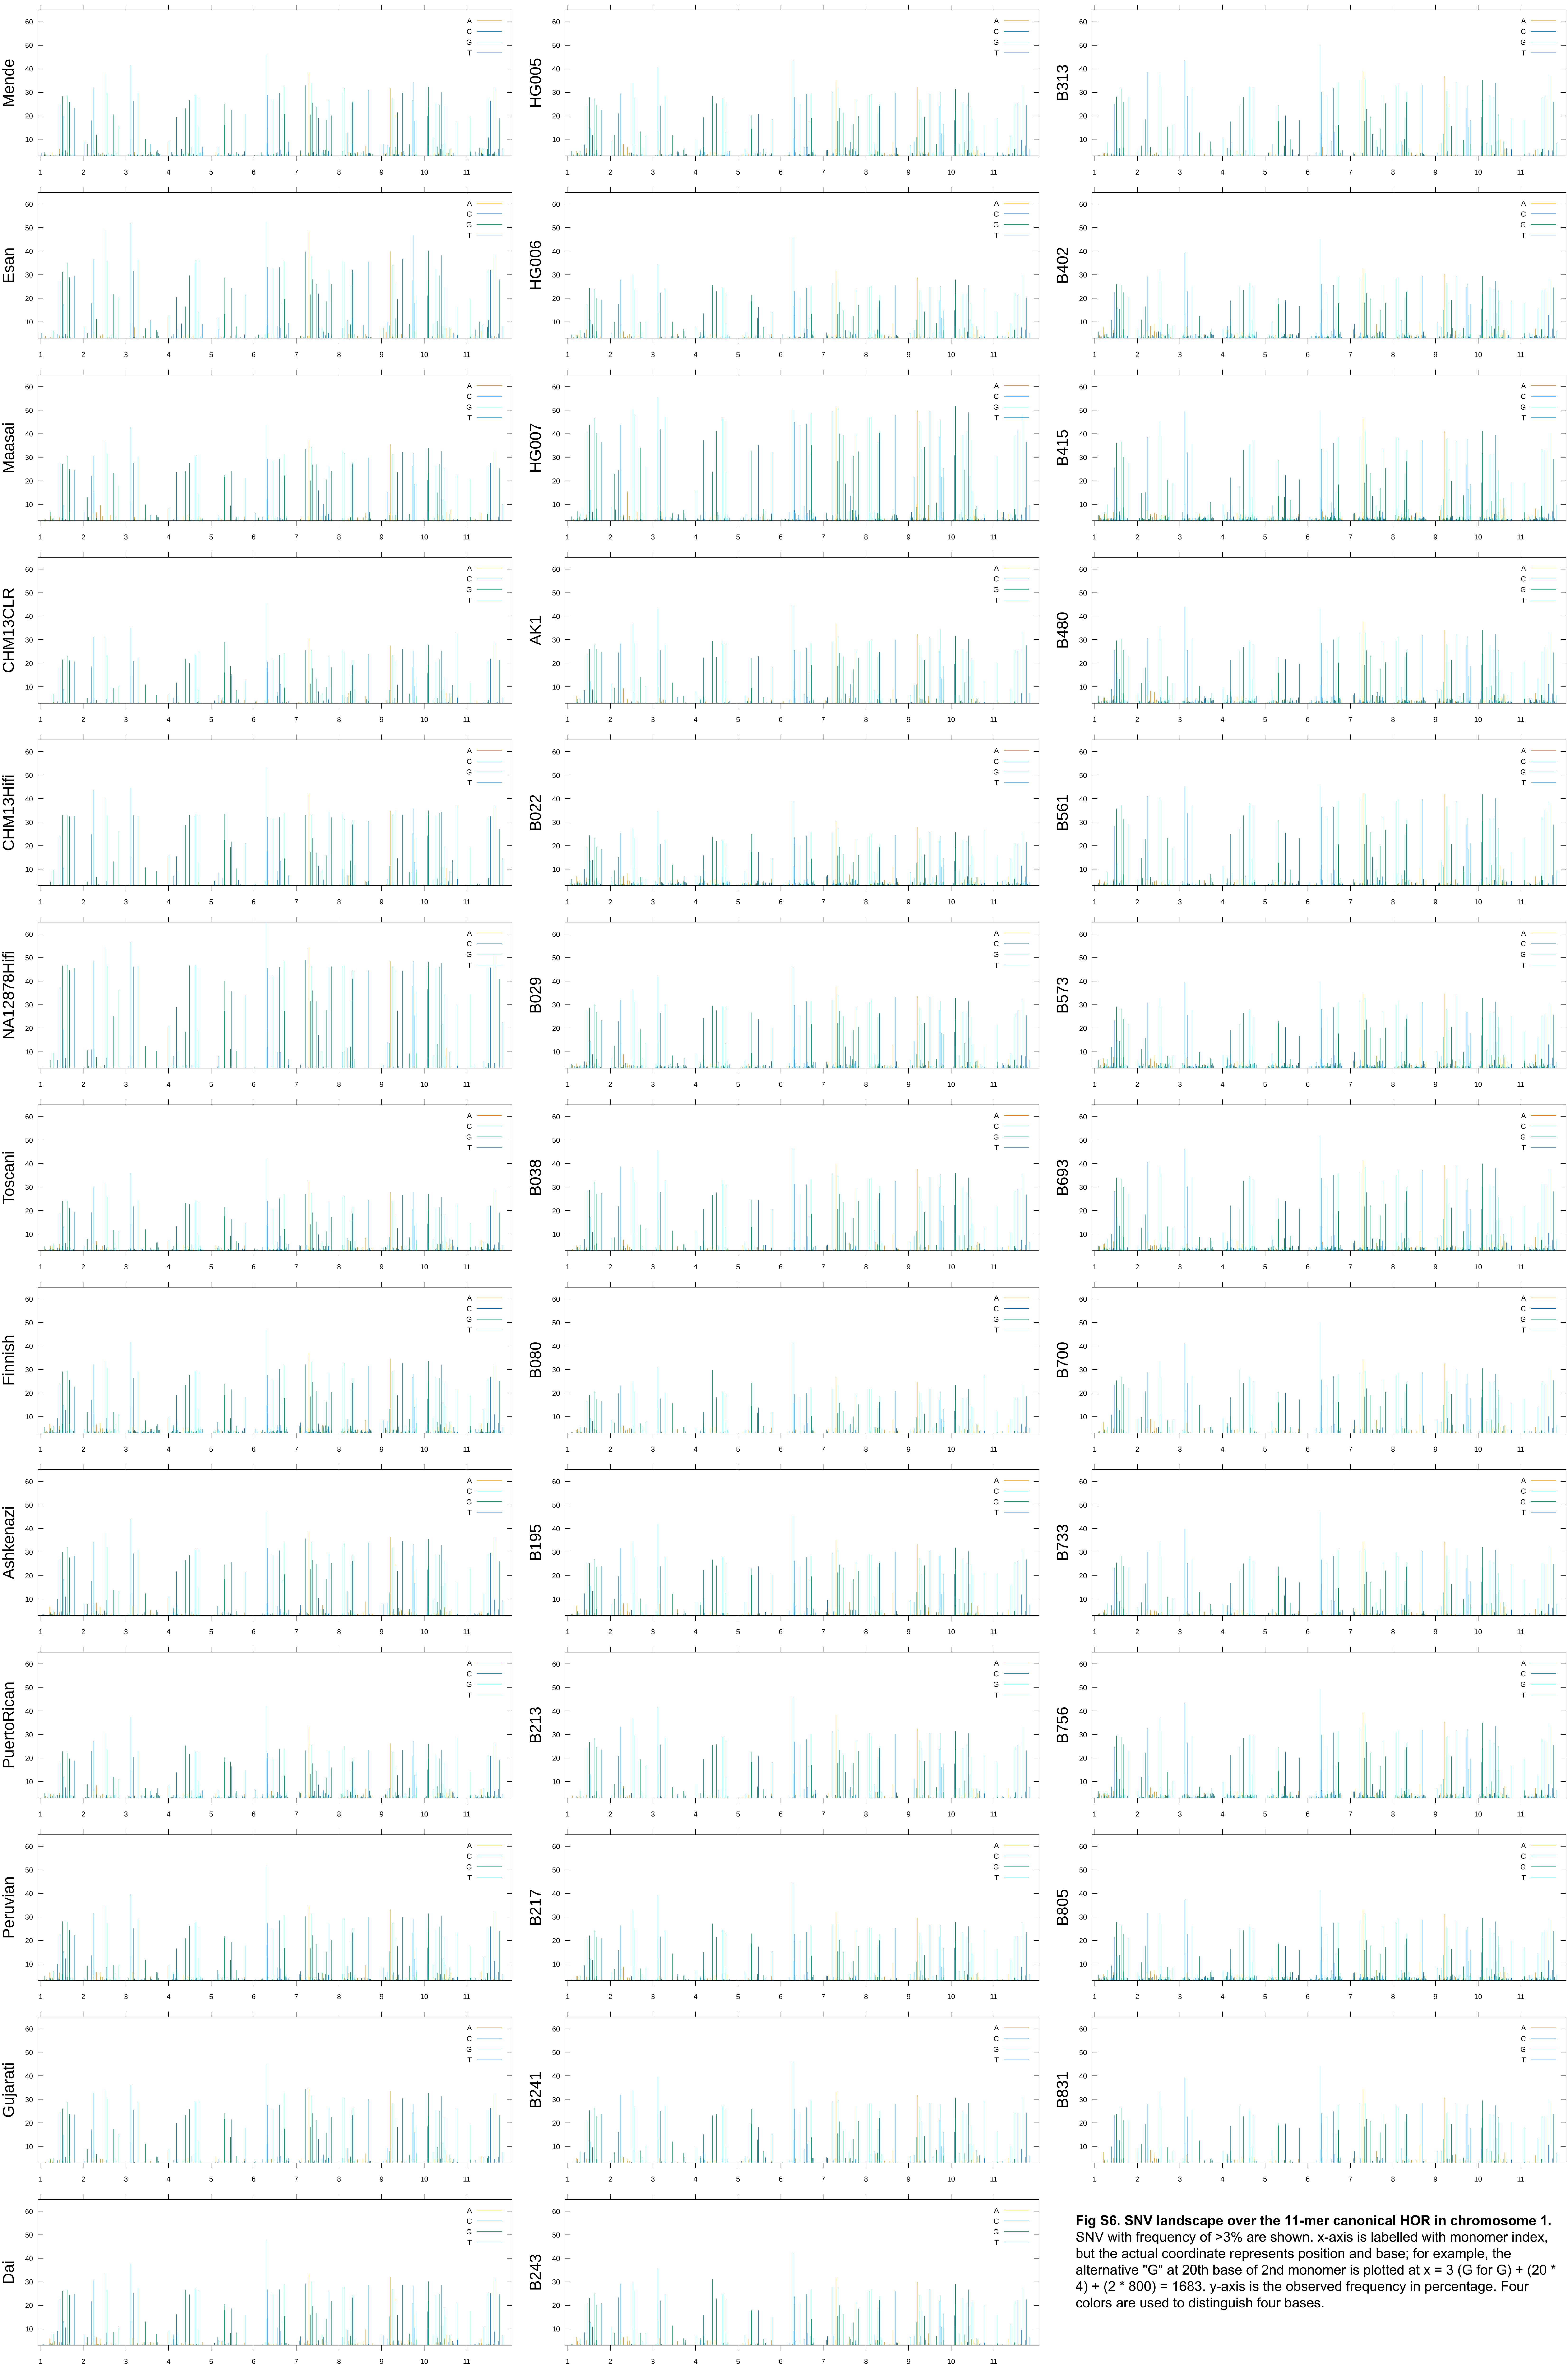

**Fig S6.** SNV landscape over the 11-mer canonical HOR in chromosome 1. SNV with frequency of >3% are shown. x-axis is labelled with monomer index, but the actual coordinate represents position and base; for example, the alternative "G" at 20th base of 2nd monomer is plotted at  $x = 3$  (G for G) +  $(20 * 4) + (2 * 800) = 1683$ . y-axis is the observed frequency in percentage. Four colors are used to distinguish four bases.

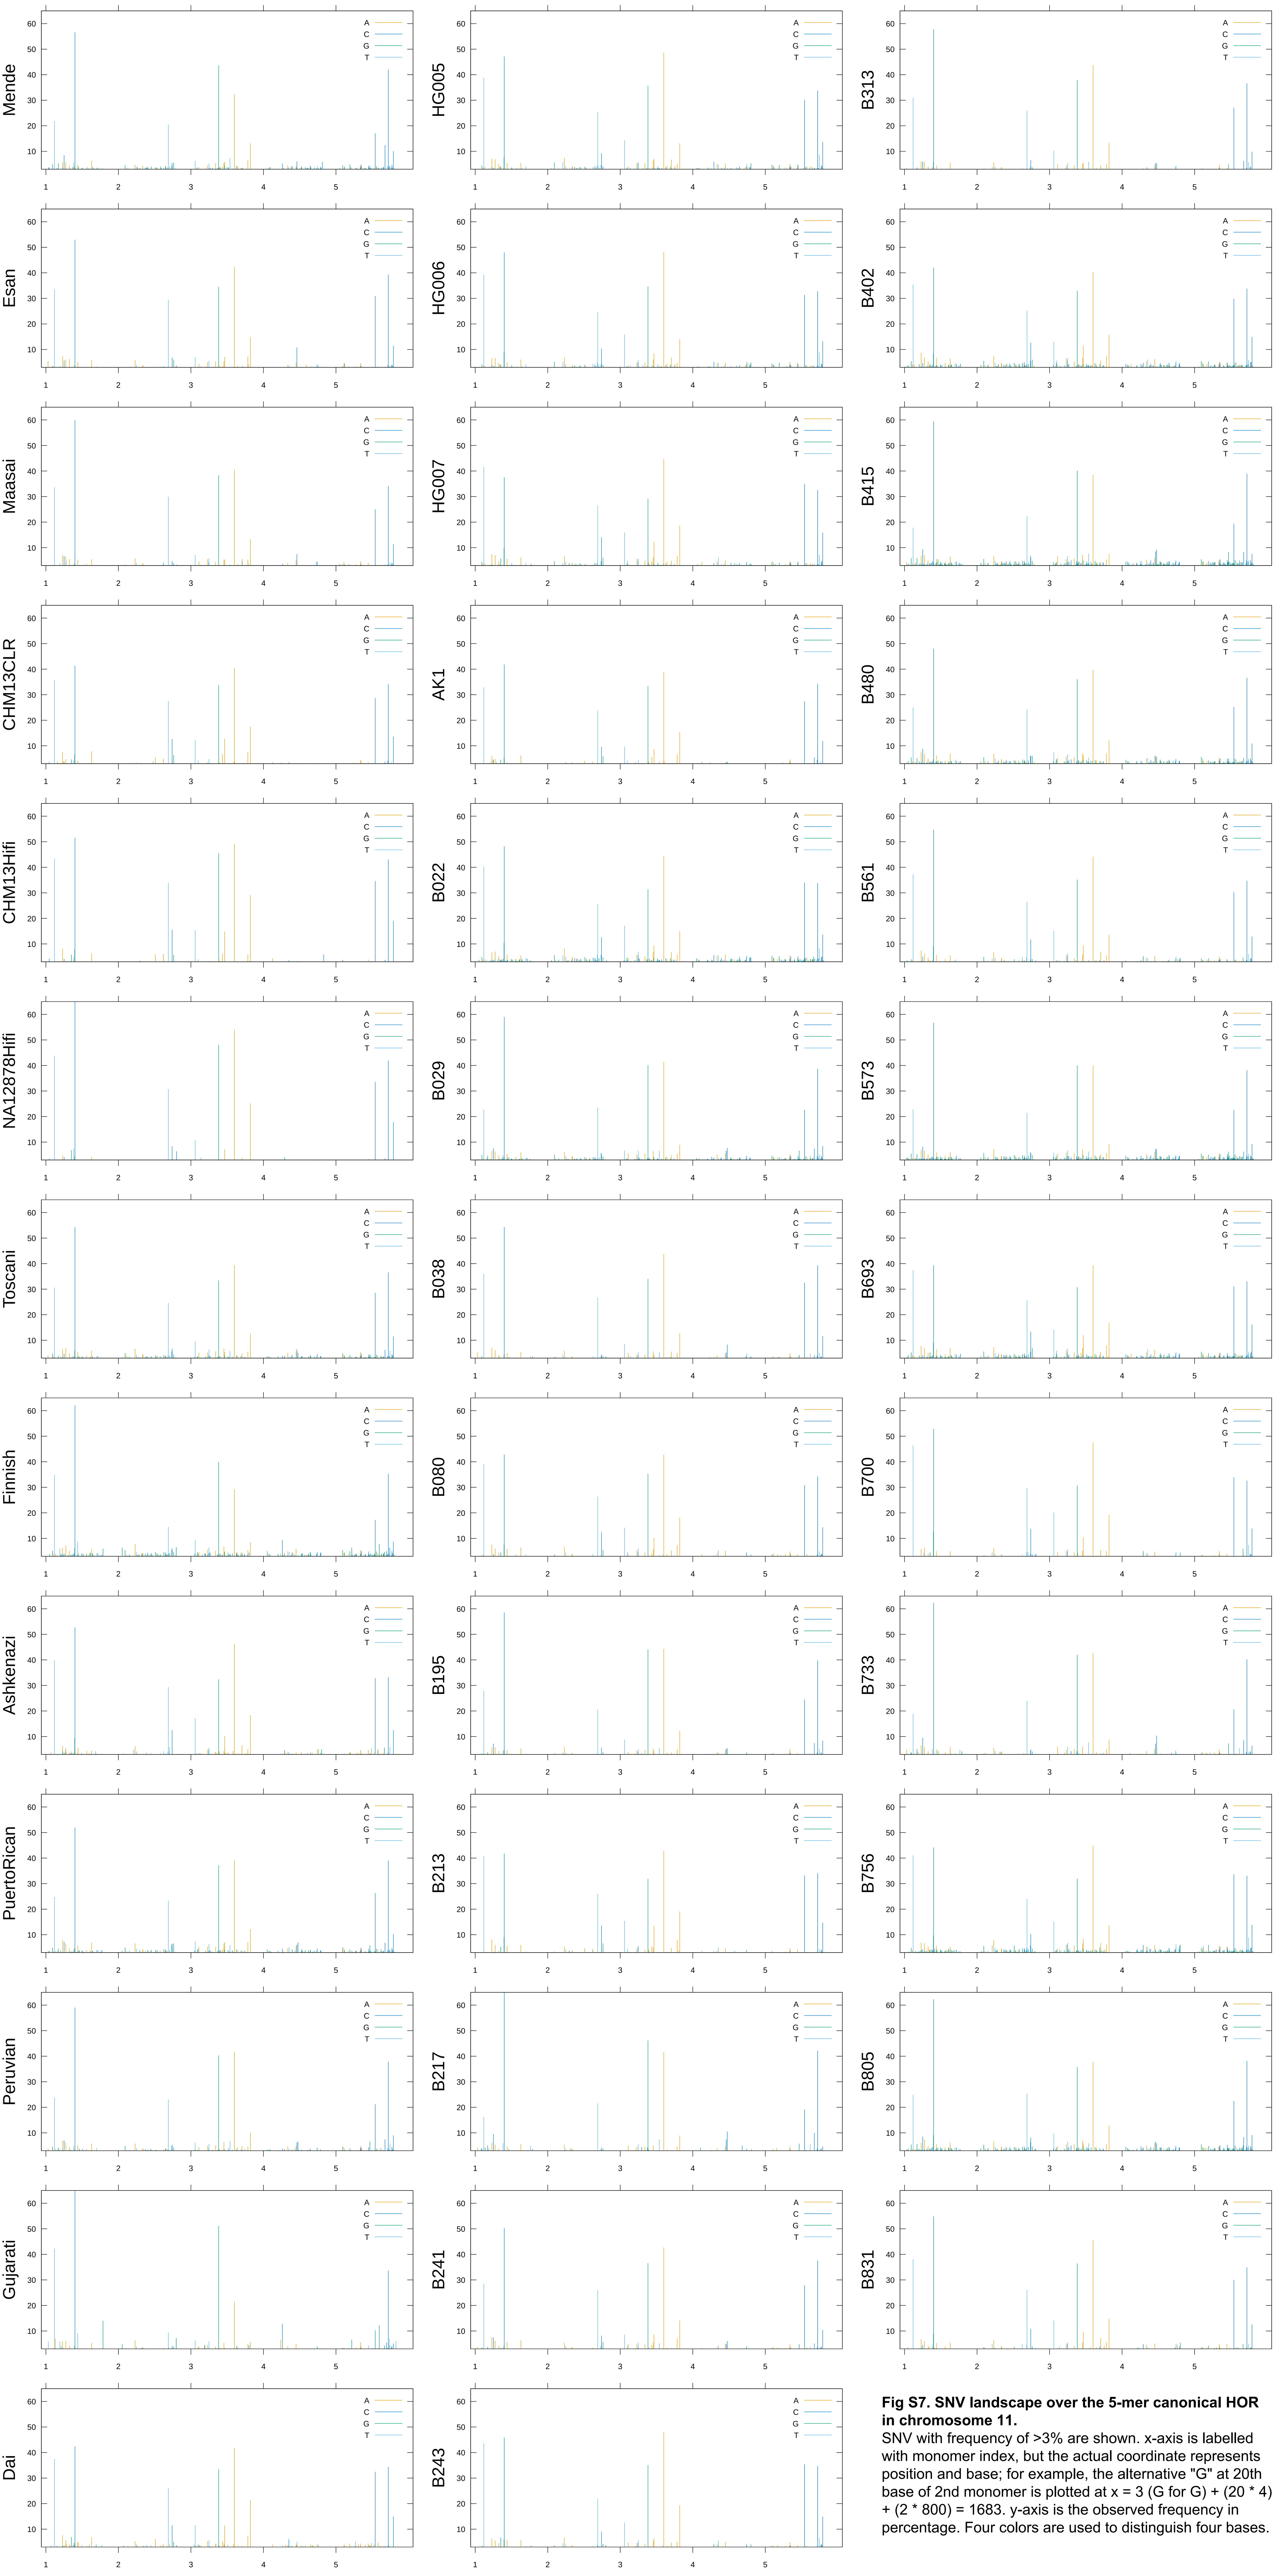

**Fig S7. SNV landscape over the 5-mer canonical HOR in chromosome 11.**

SNV with frequency of >3% are shown. x-axis is labelled with monomer index, but the actual coordinate represents position and base; for example, the alternative "G" at 20th base of 2nd monomer is plotted at  $x = 3$  (G for G) +  $(20 * 4) + (2 * 800) = 1683$ . y-axis is the observed frequency in percentage. Four colors are used to distinguish four bases.



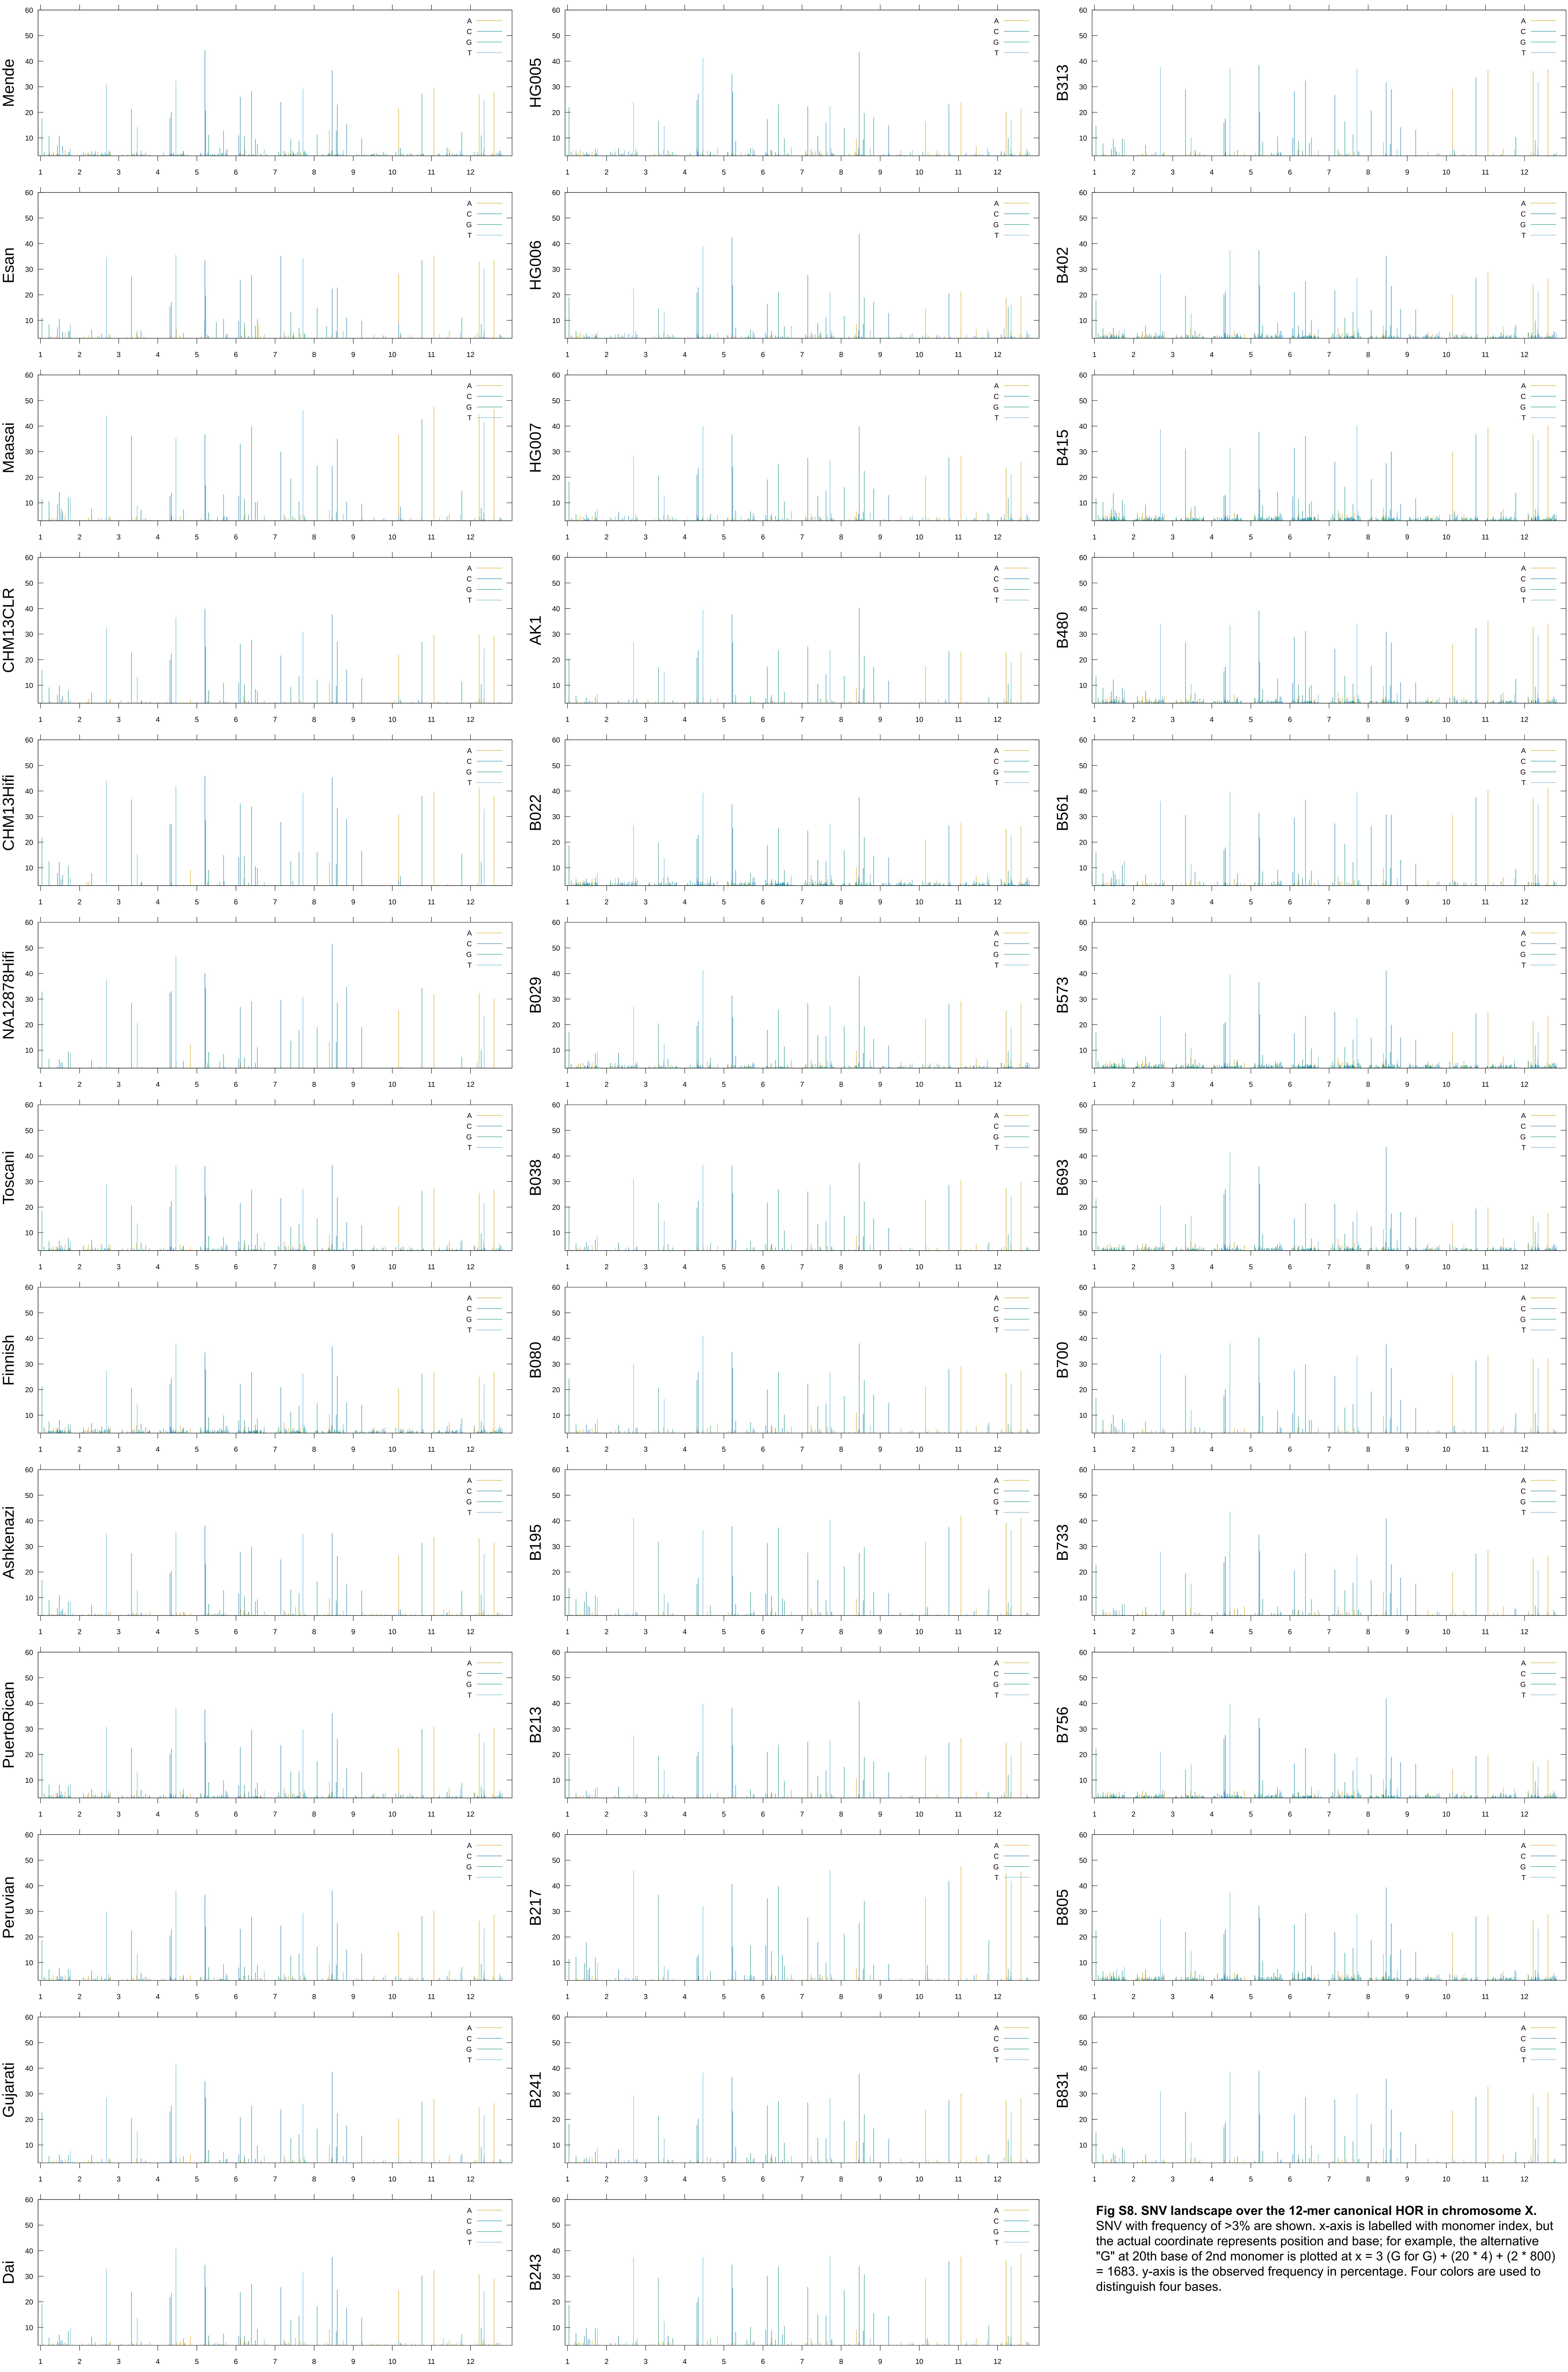

**Fig S8. SNV landscape over the 12-mer canonical HOR in chromosome X.**  
 SNV with frequency of >3% are shown. x-axis is labelled with monomer index, but the actual coordinate represents position and base; for example, the alternative "G" at 20th base of 2nd monomer is plotted at  $x = 3 (G \text{ for } G) + (20 * 4) + (2 * 800) = 1683$ . y-axis is the observed frequency in percentage. Four colors are used to distinguish four bases.

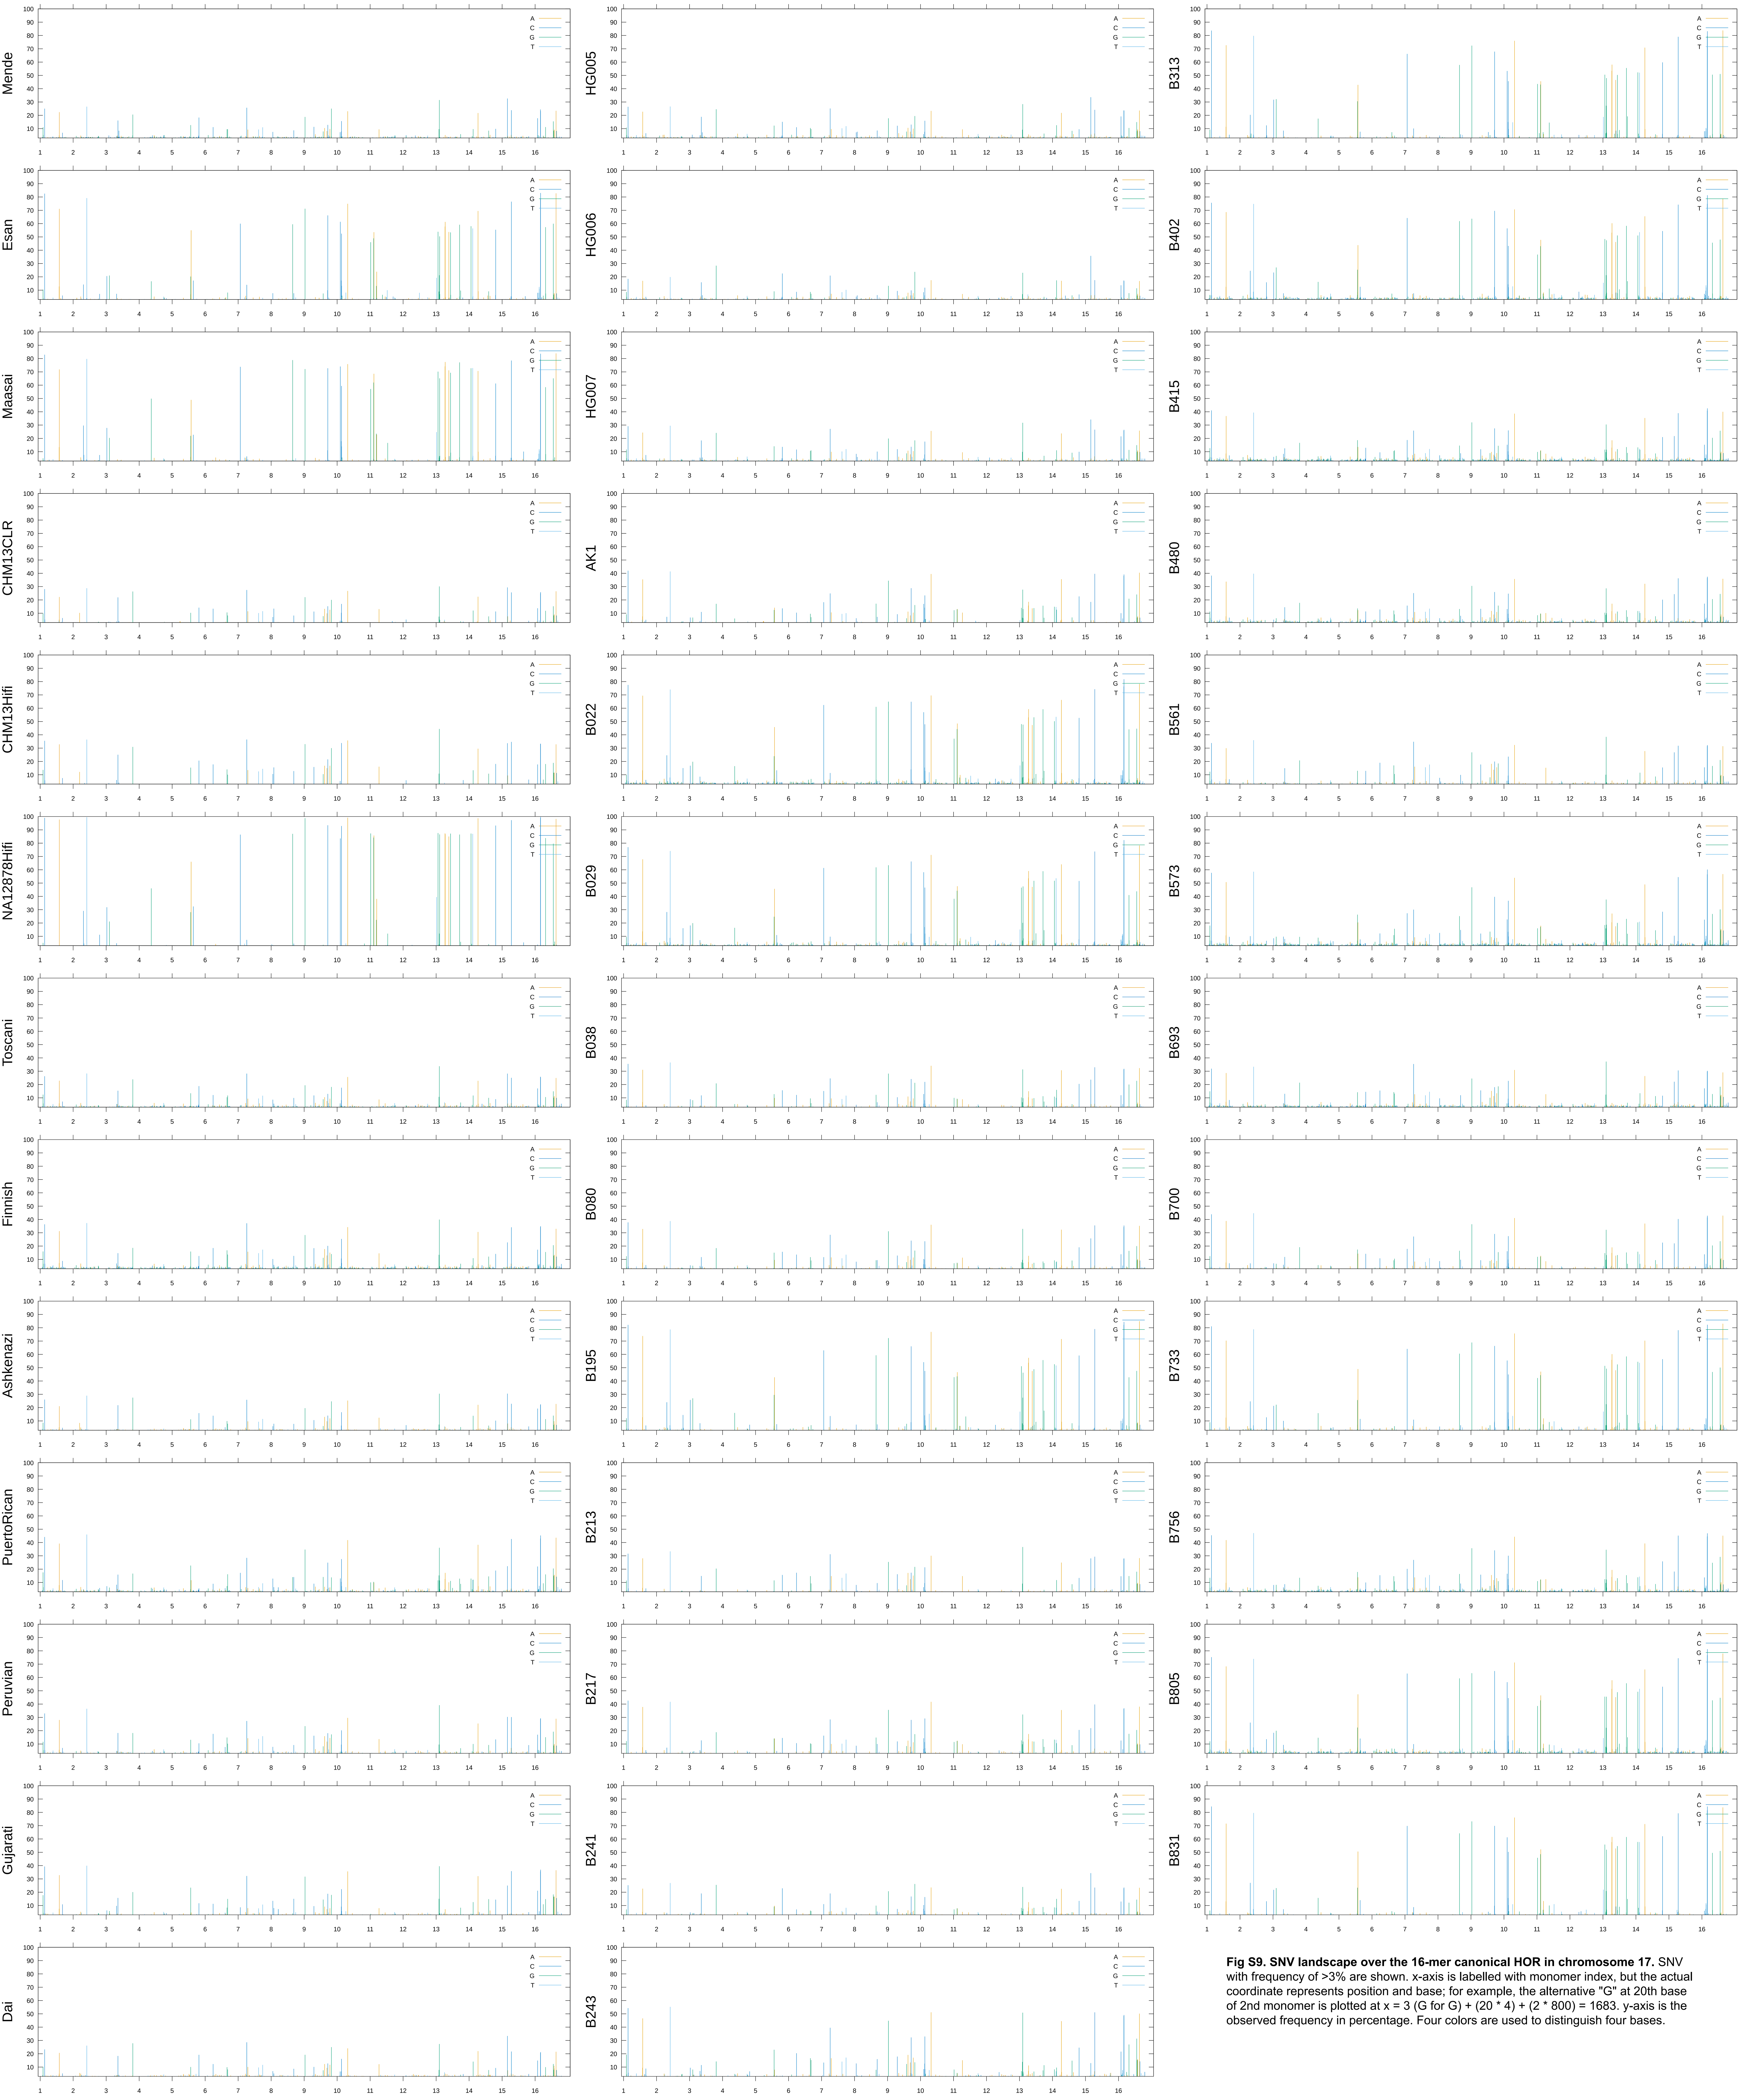

**Fig S9. SNV landscape over the 16-mer canonical HOR in chromosome 17.** SNV with frequency of >3% are shown. x-axis is labelled with monomer index, but the actual coordinate represents position and base, for example, the alternative "G" at 20th base of 2nd monomer is plotted at  $x = 3 \text{ (G for G)} + (20 \cdot 4) + (2 \cdot 800) = 1683$ . y-axis is the observed frequency in percentage. Four colors are used to distinguish four bases.

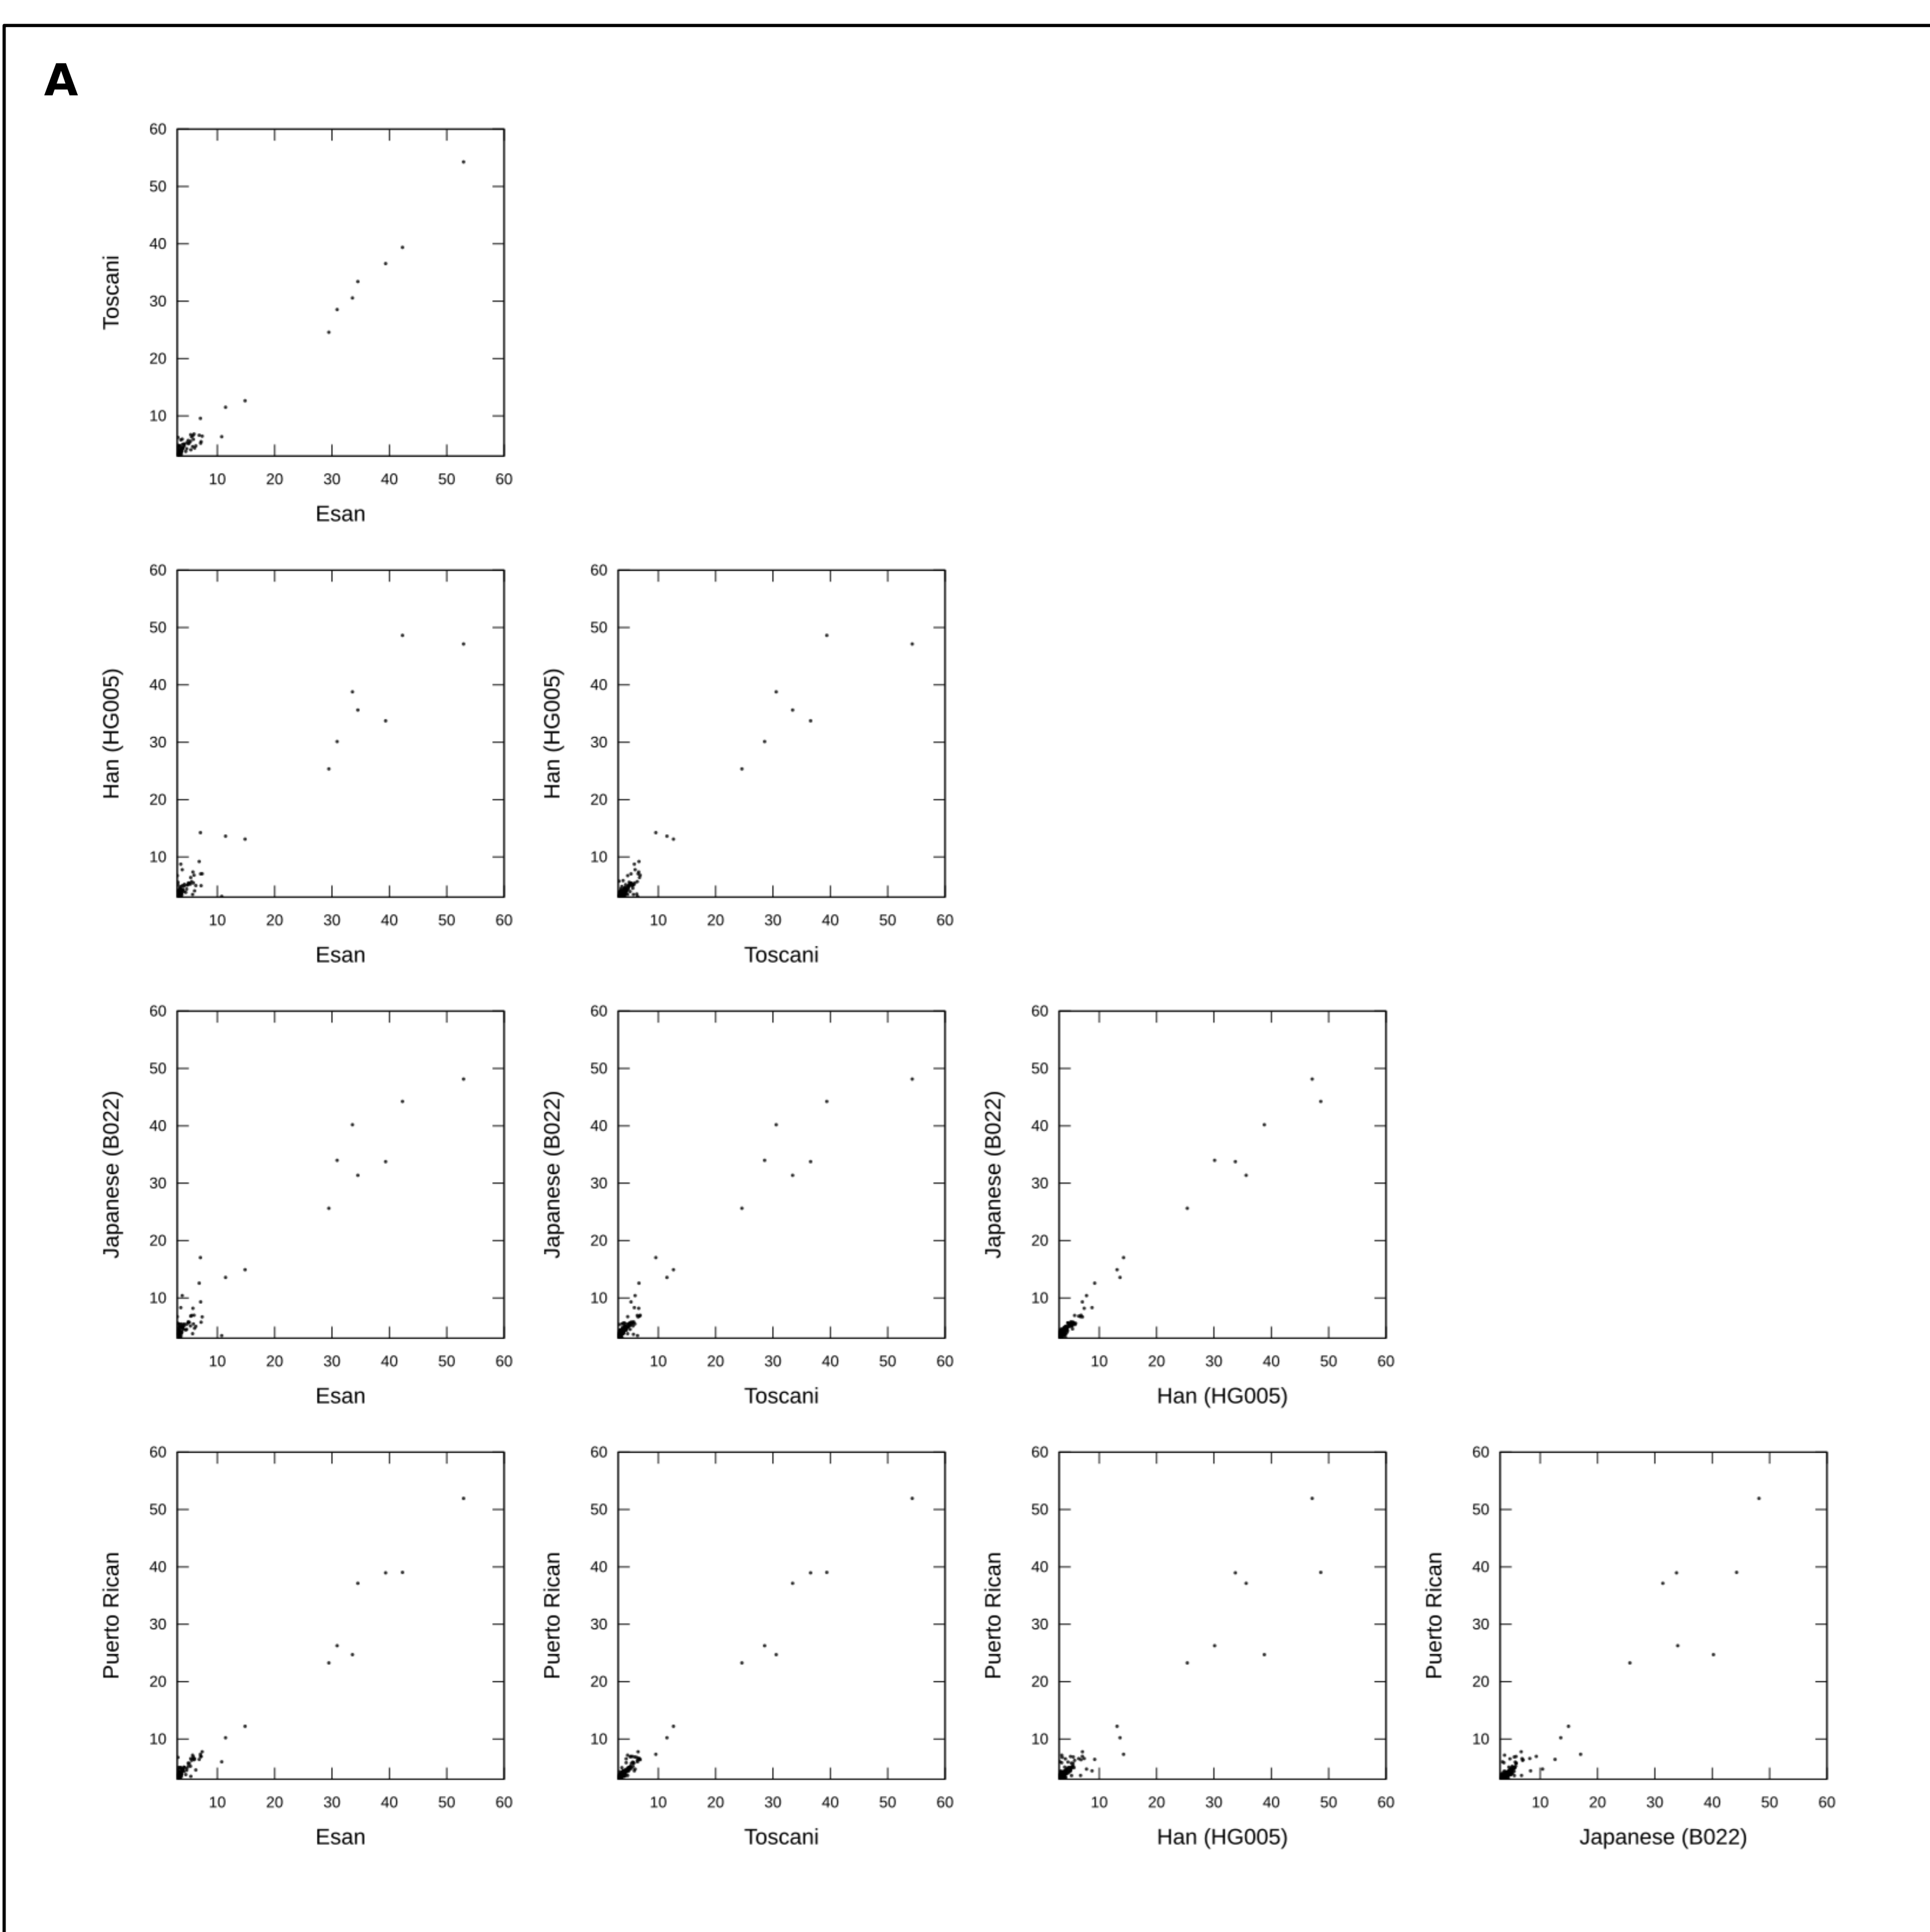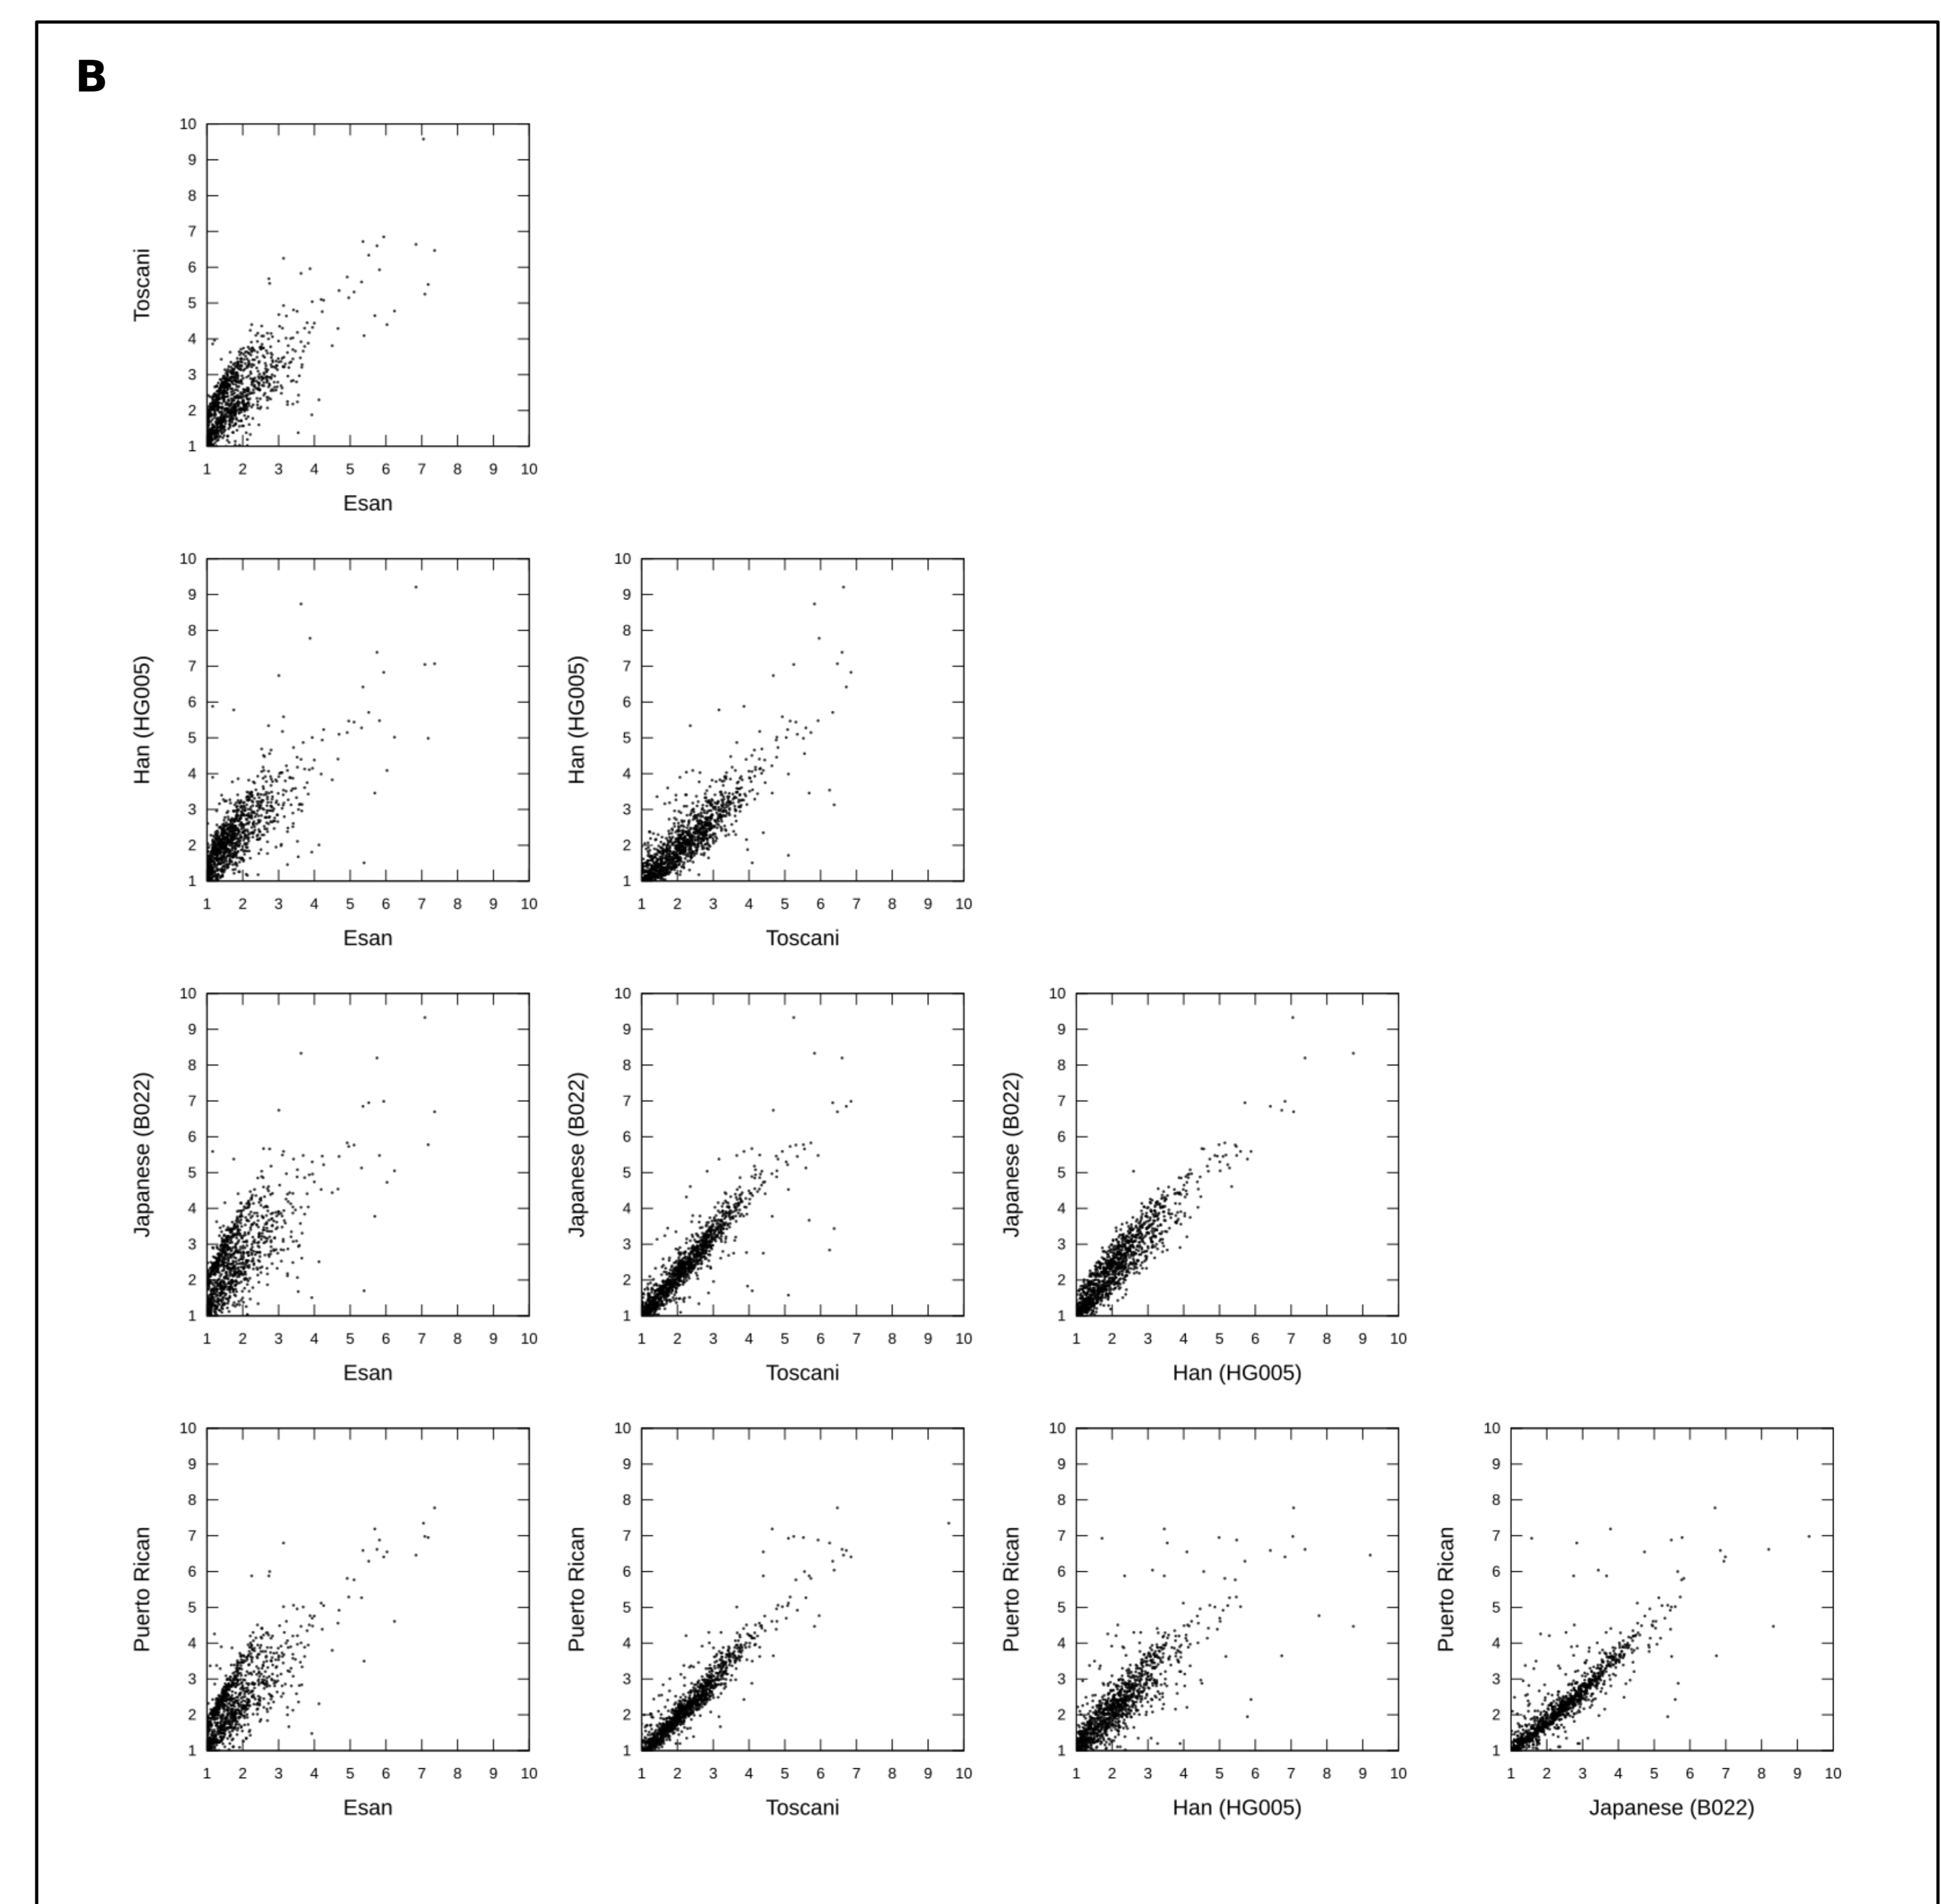

**Fig S10. Comparison of SNV frequencies on the canonical 5-mer HOR in chromosome 11.** Each dot represents a single SNV (a position and an alternative base). The left panel (A) shows the SNVs with the frequencies of >3% in both samples in x-, and y-axis, and the right panel (B) shows those of the frequencies within 1-10%.

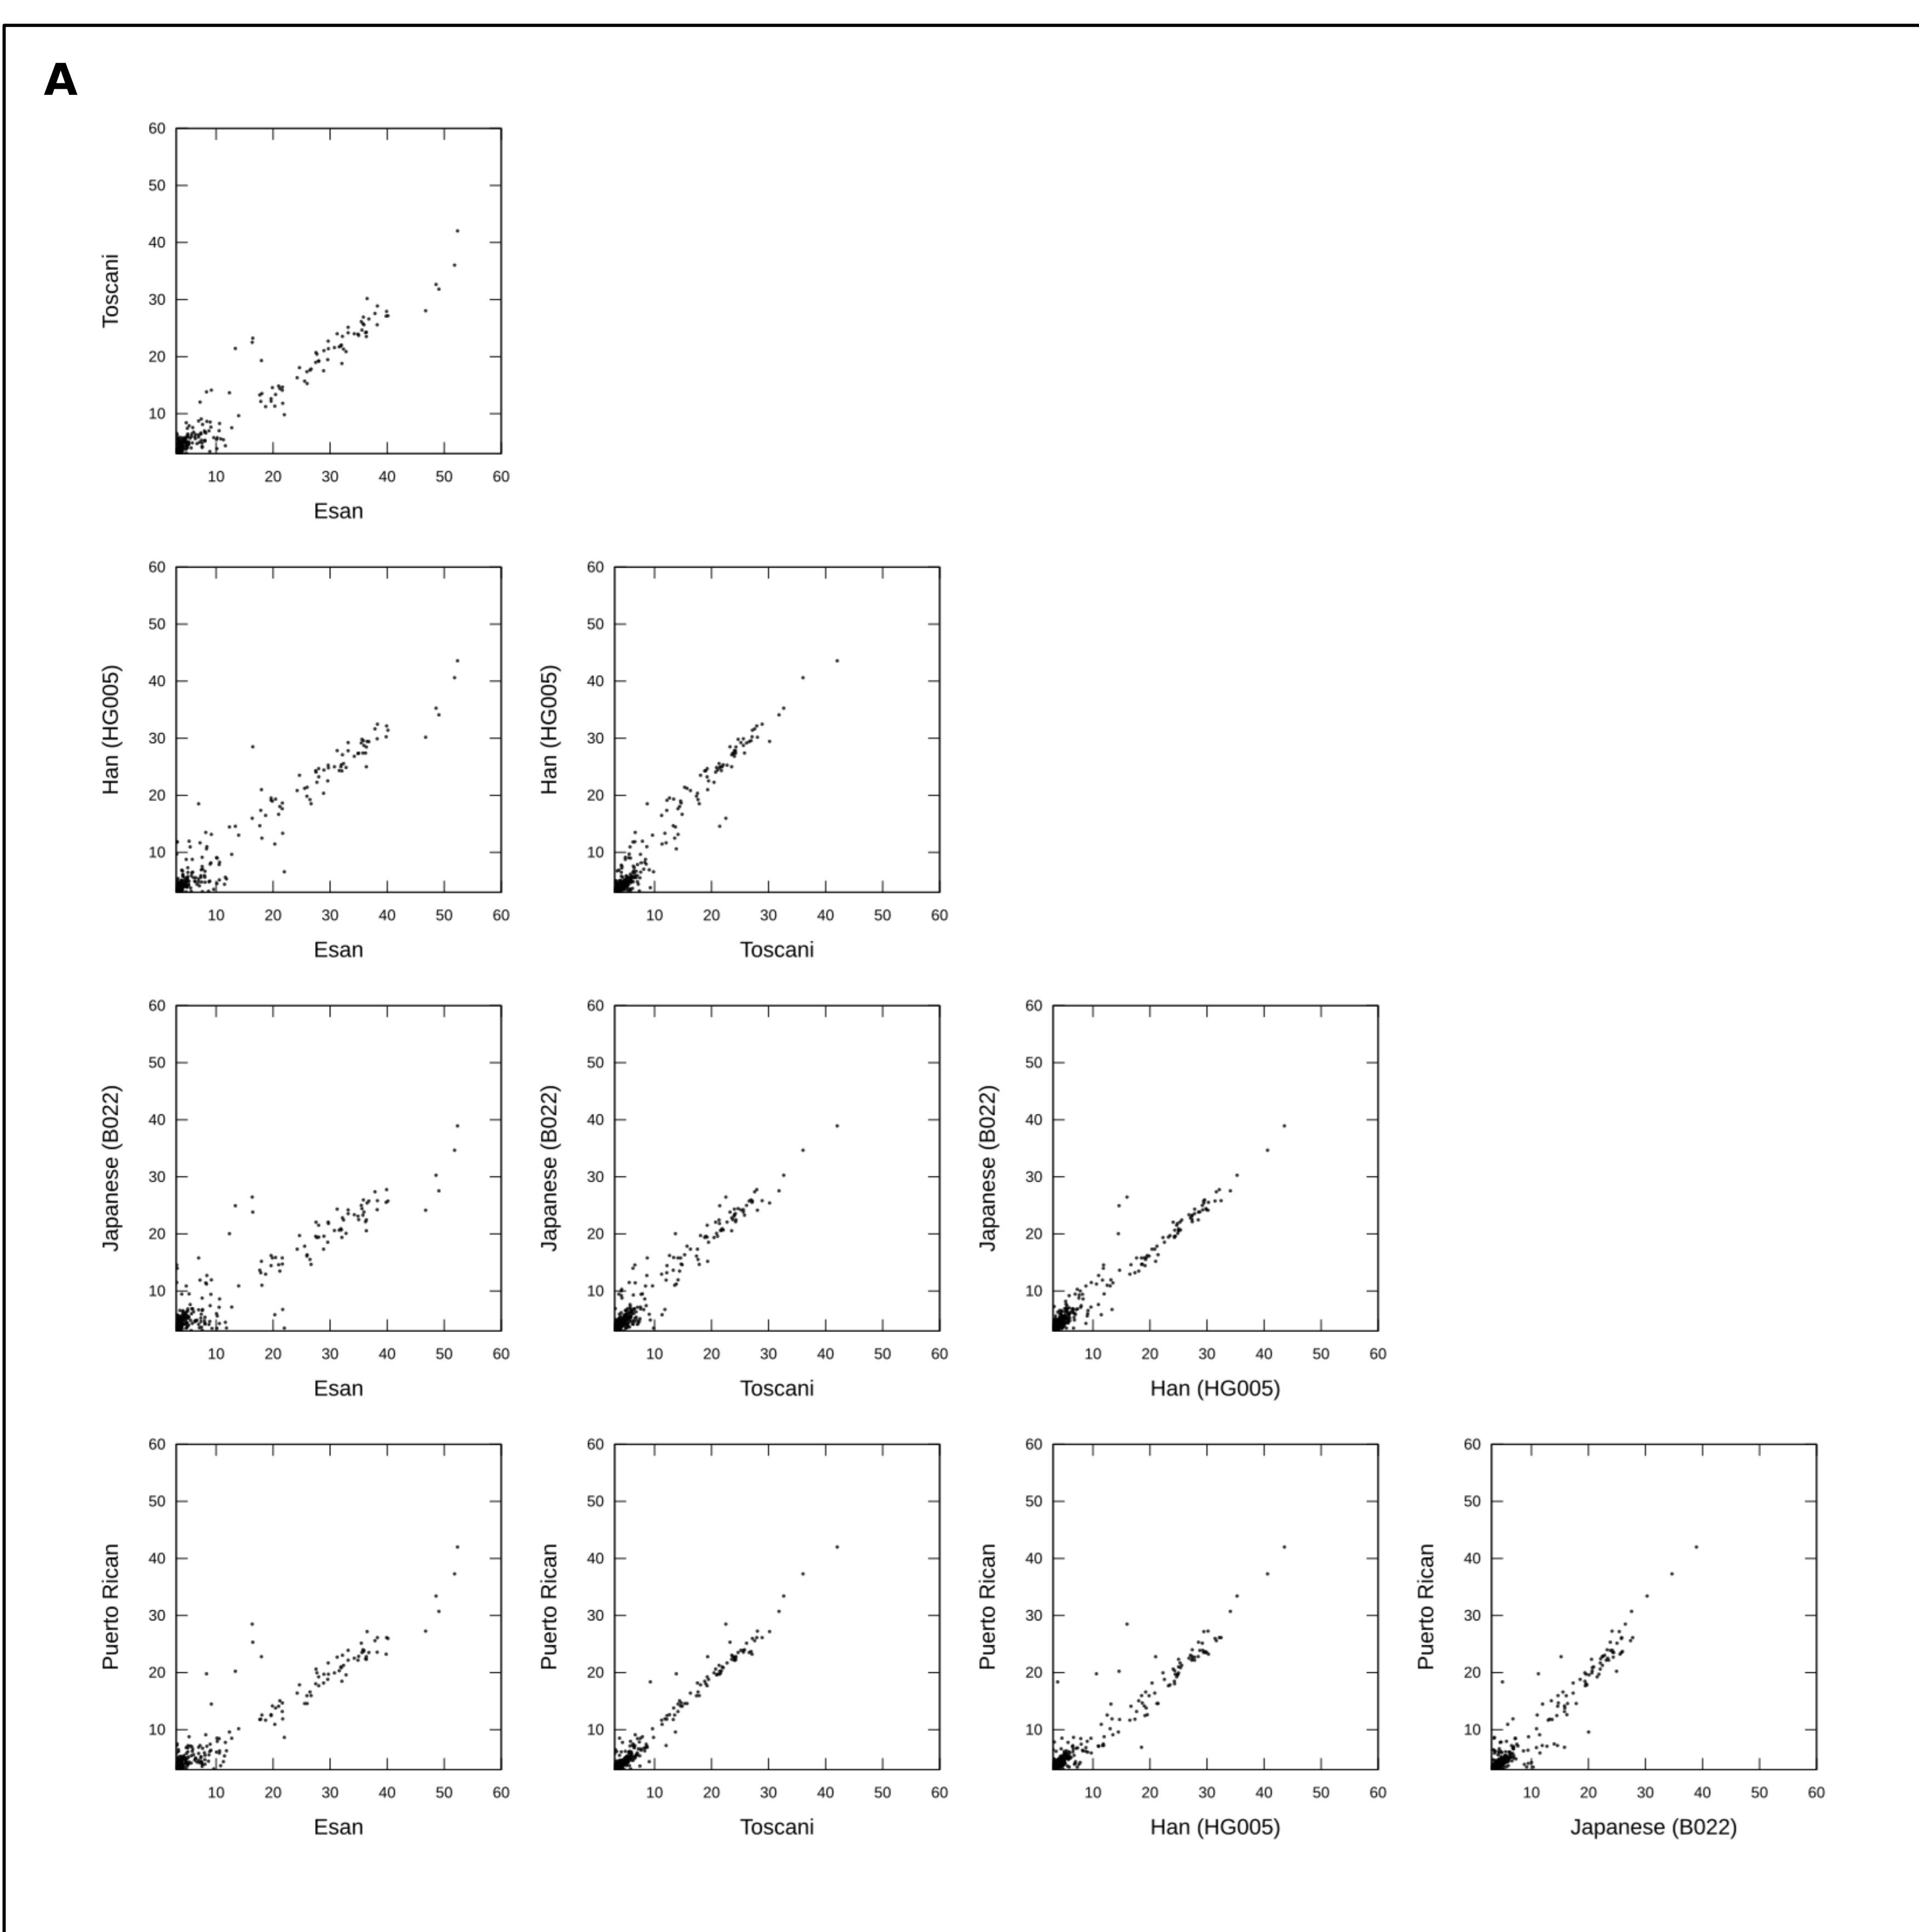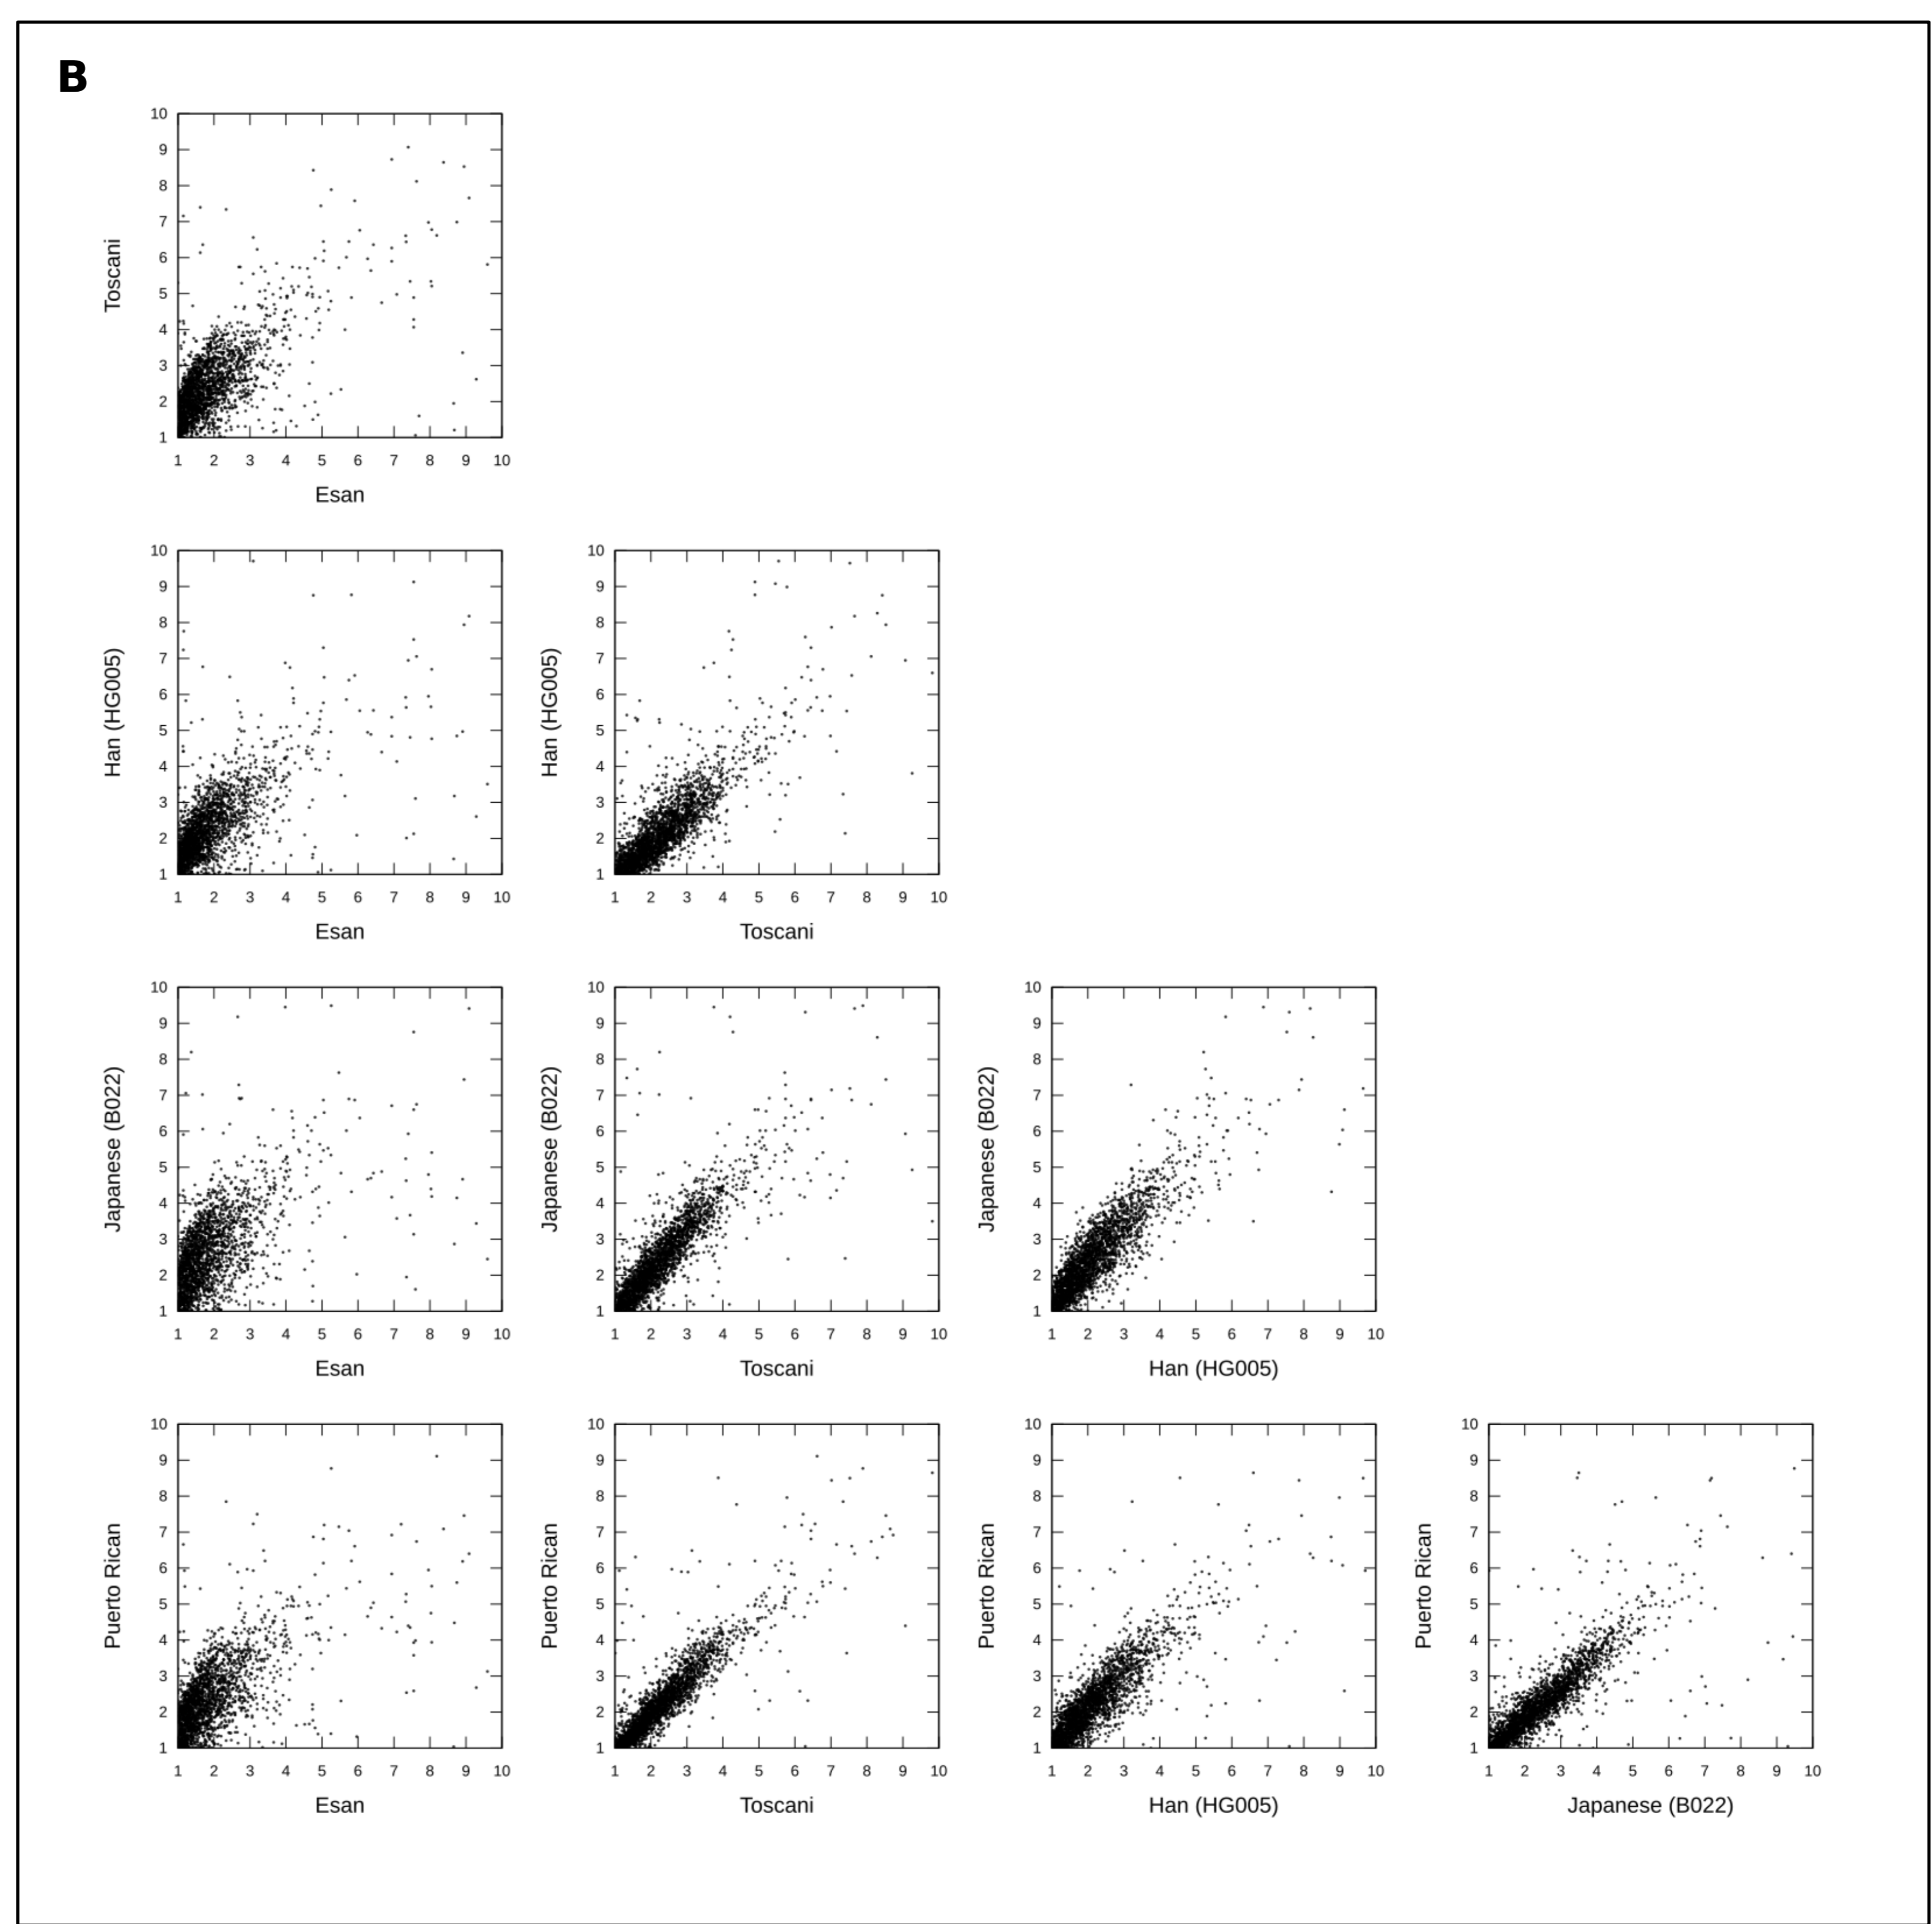

**Fig S11. Comparison of SNV frequencies on the canonical 11-mer HOR in chromosome 1.** Each dot represents a single SNV (a position and an alternative base). The left panel (A) shows the SNVs with the frequencies of >3% in both samples in x-, and y-axis, and the right panel (B) shows those of the frequencies within 1-10%.

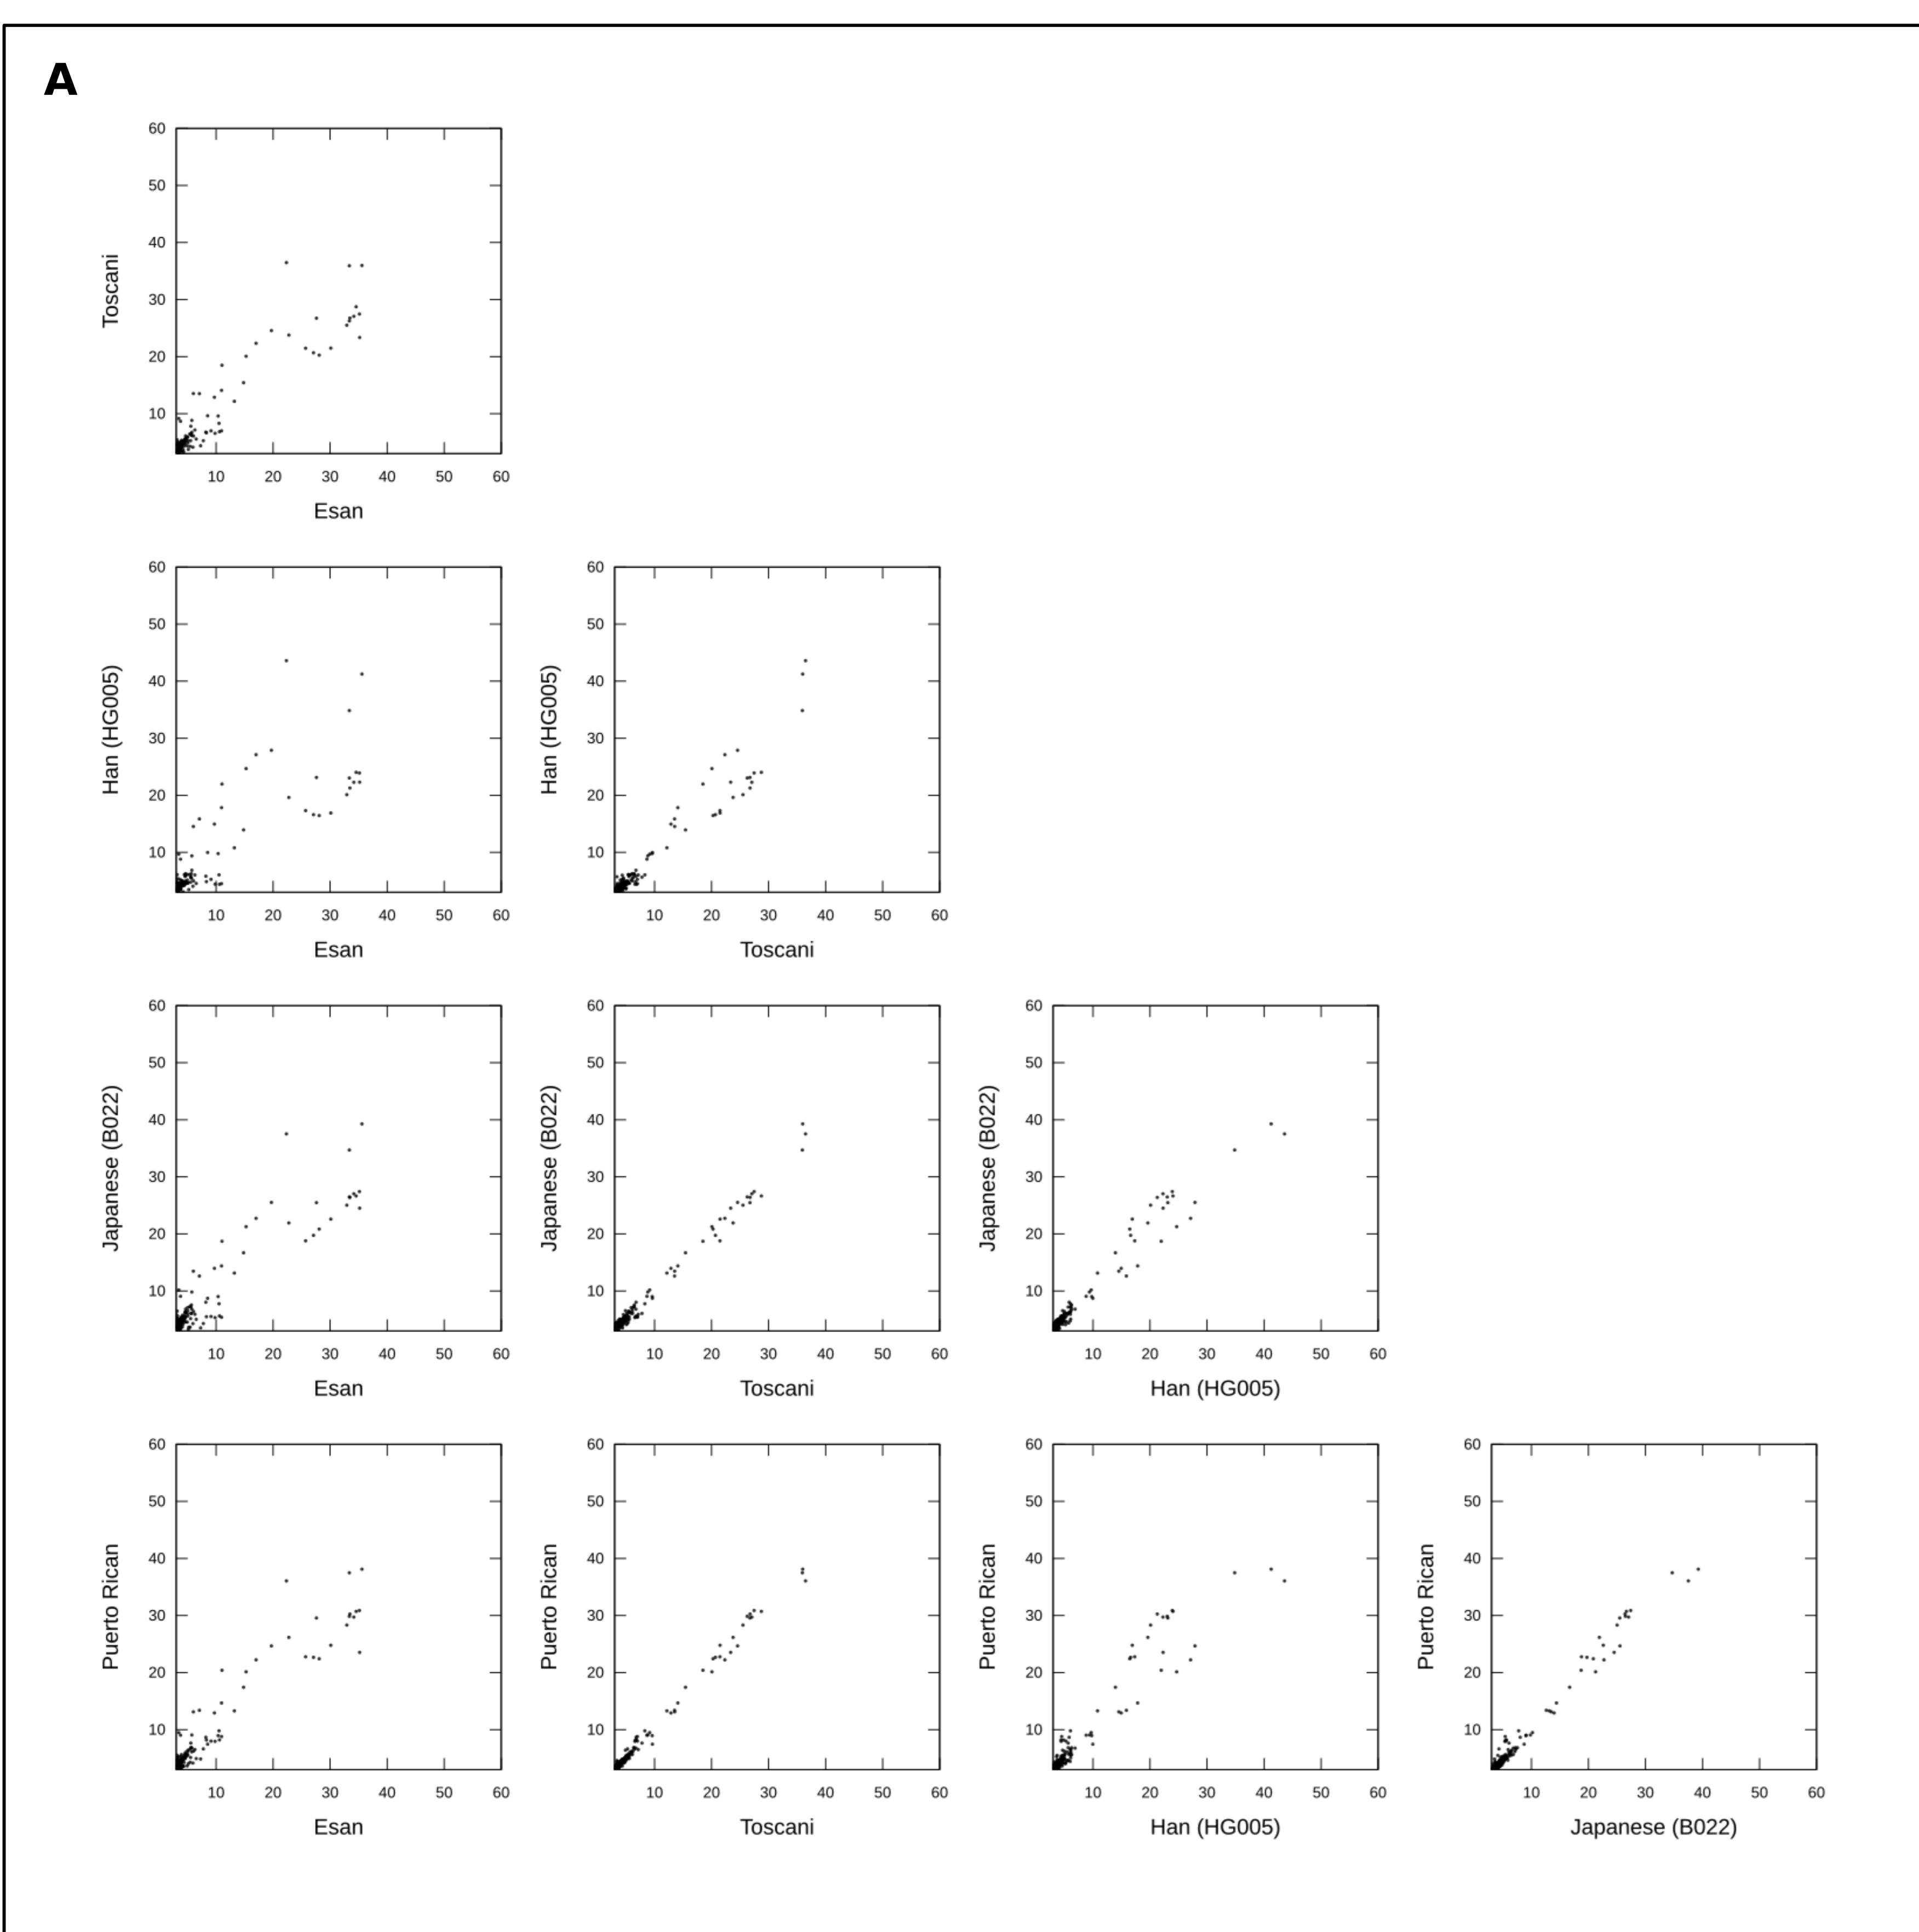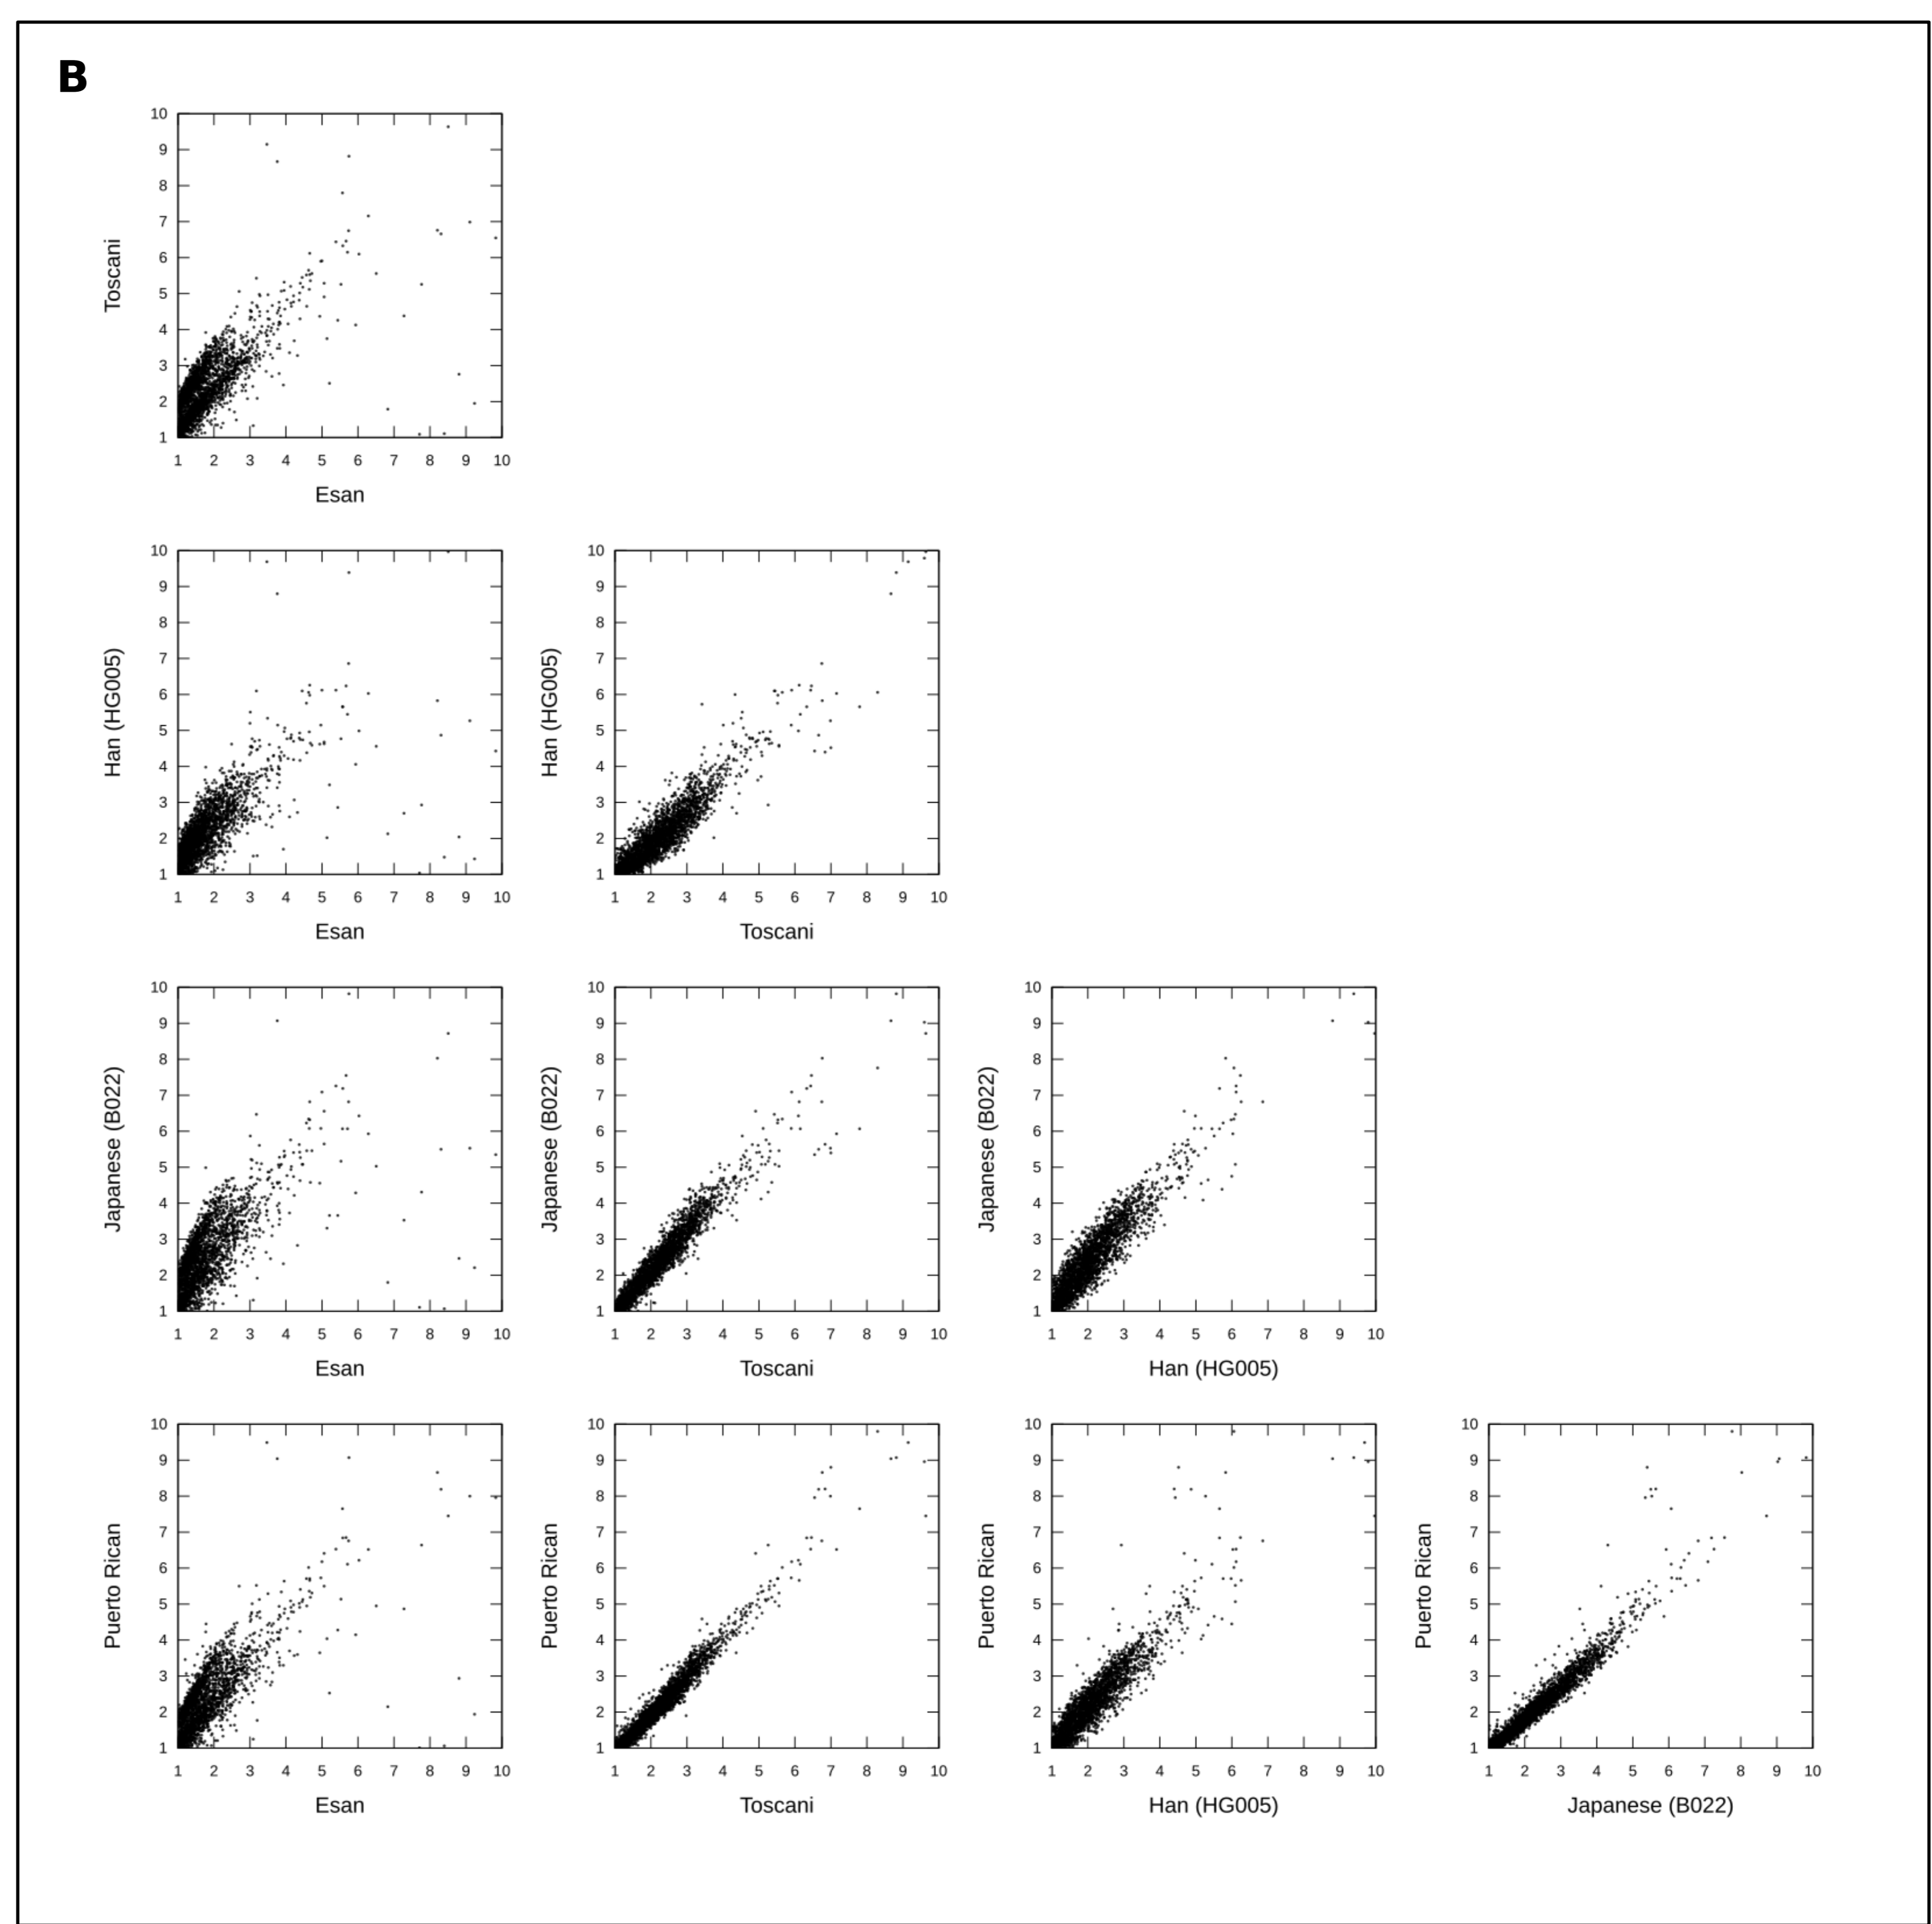

Fig S12. Comparison of SNV frequencies on the canonical 12-mer HOR in chromosome X. Each dot represents a single SNV (a position and an alternative base). The left panel (A) shows the SNVs with the frequencies of >3% in both samples in x-, and y-axis, and the right panel (B) shows those of the frequencies within 1-10%.

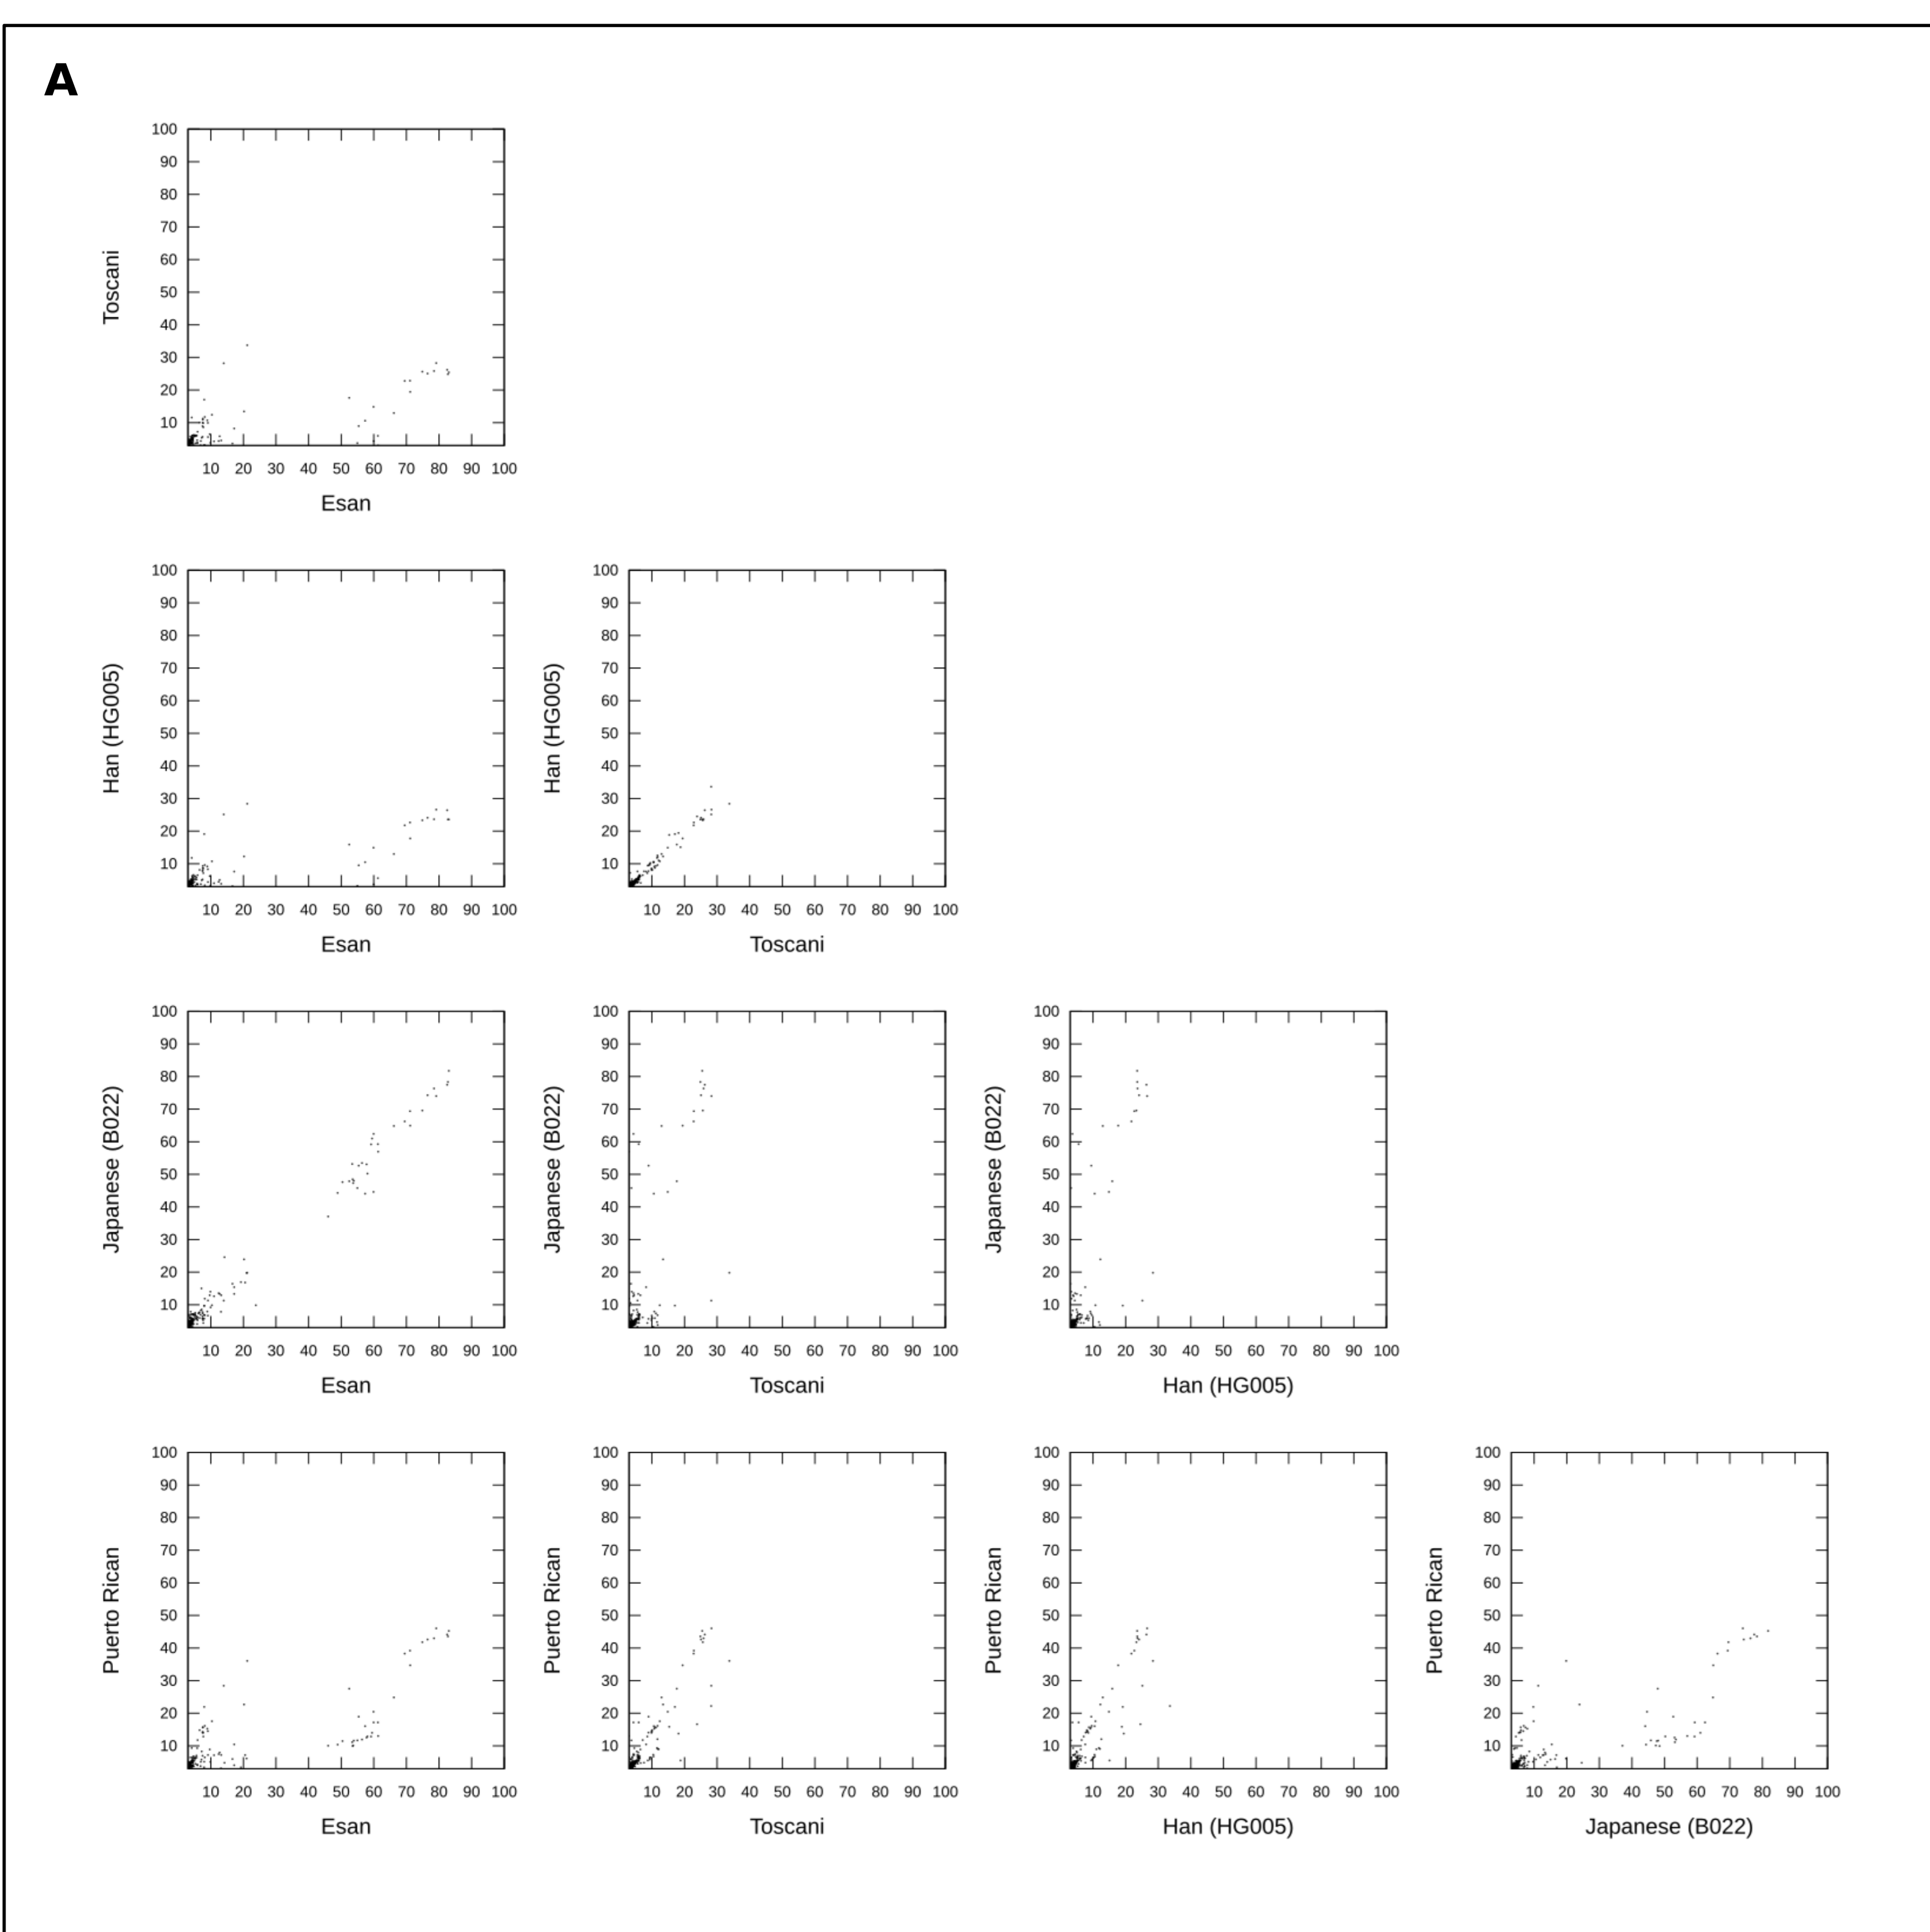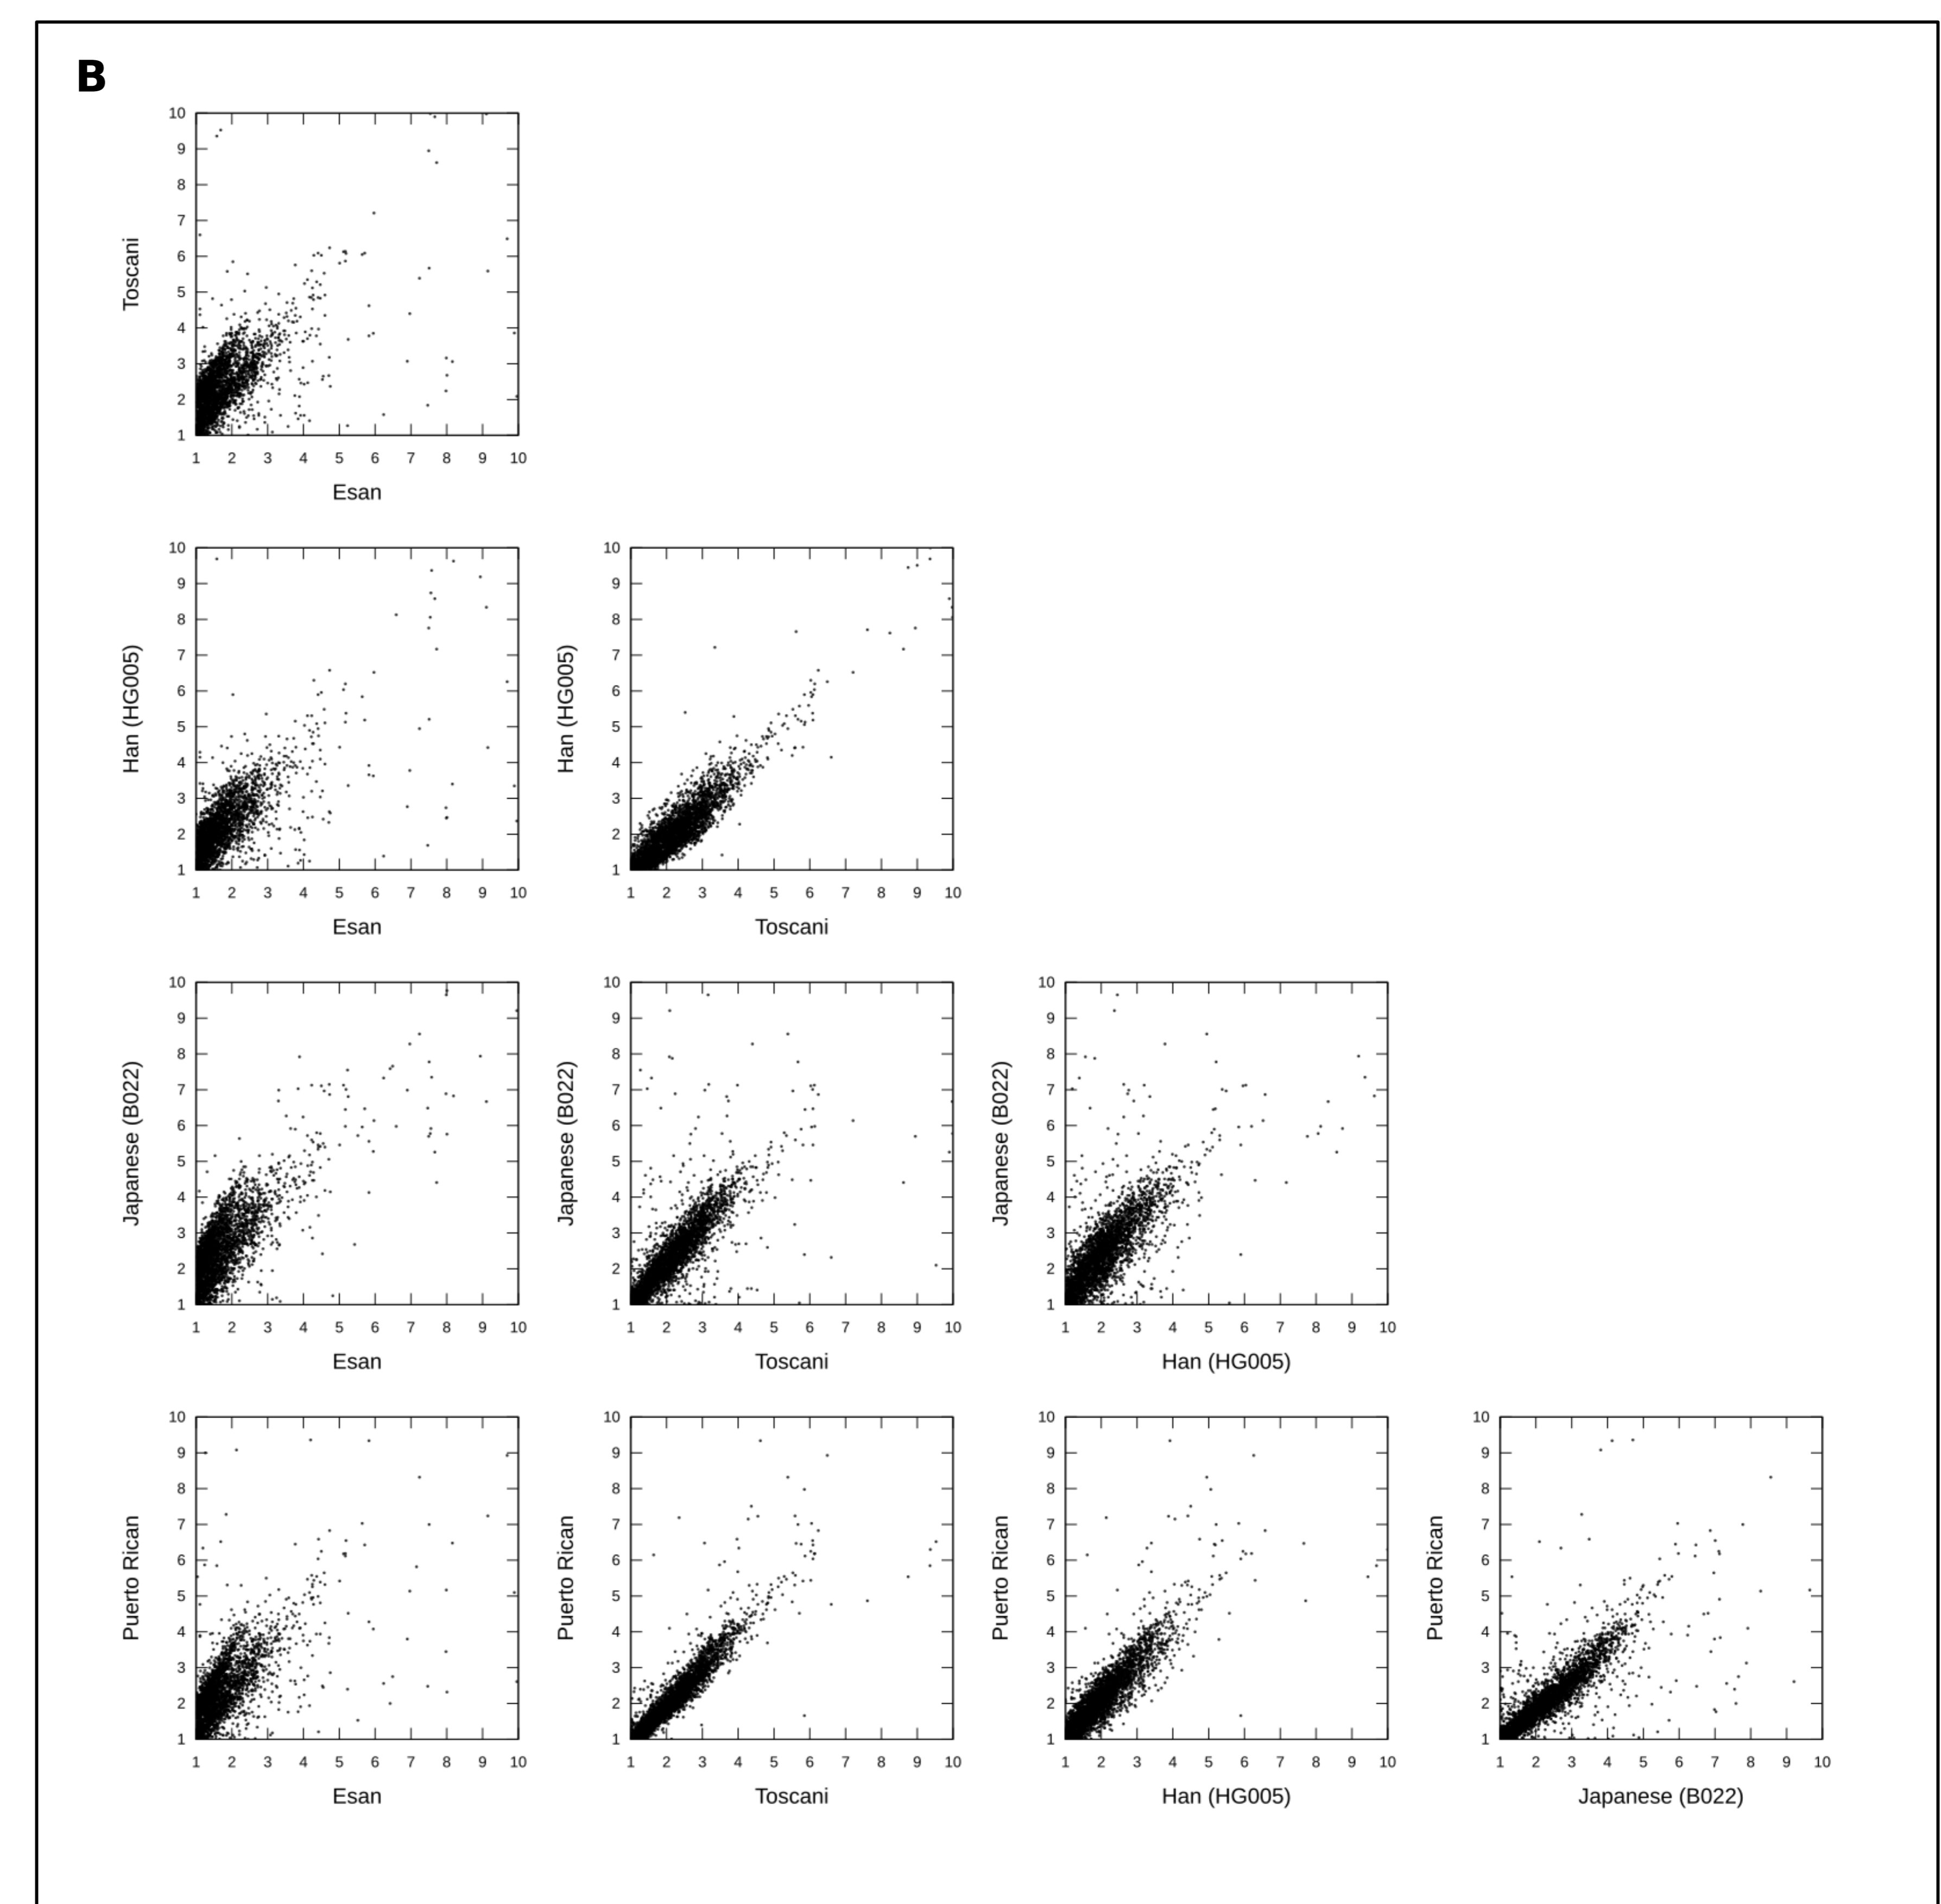

Fig S13. Comparison of SNV frequencies on the canonical 16-mer HOR in chromosome 17. Each dot represents a single SNV (a position and an alternative base). The left panel (A) shows the SNVs with the frequencies of >3% in both samples in x-, and y-axis, and the right panel (B) shows those of the frequencies within 1-10%.

**A**

\*\*\* p<0.001  
\*\* p<0.01  
\* p<0.05

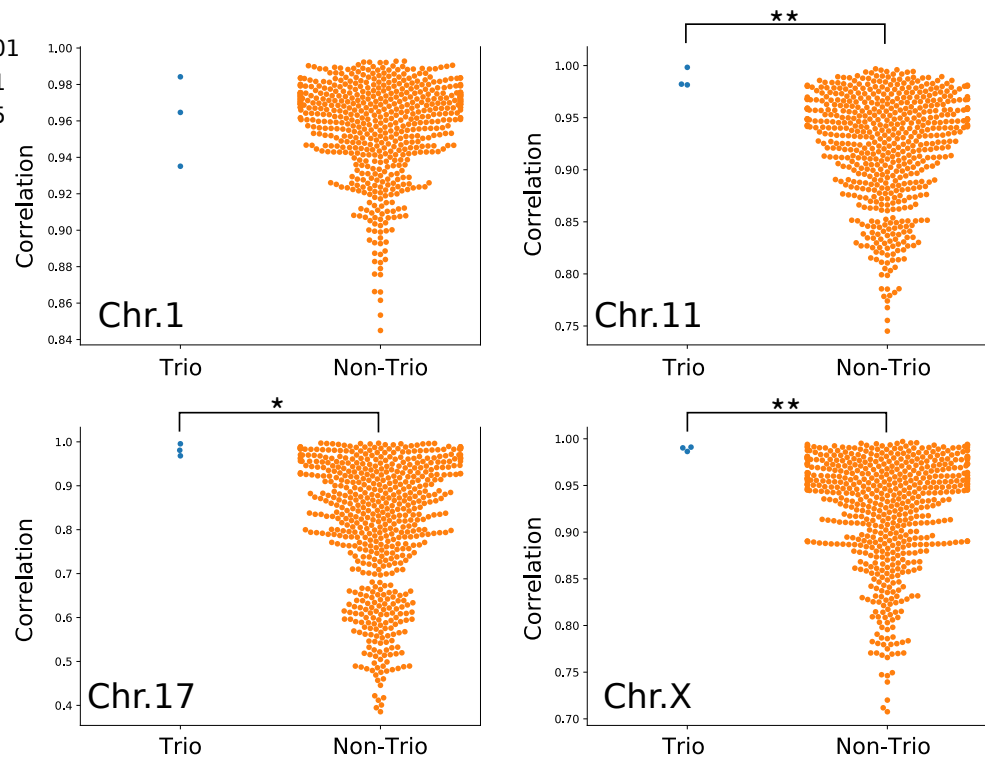**B**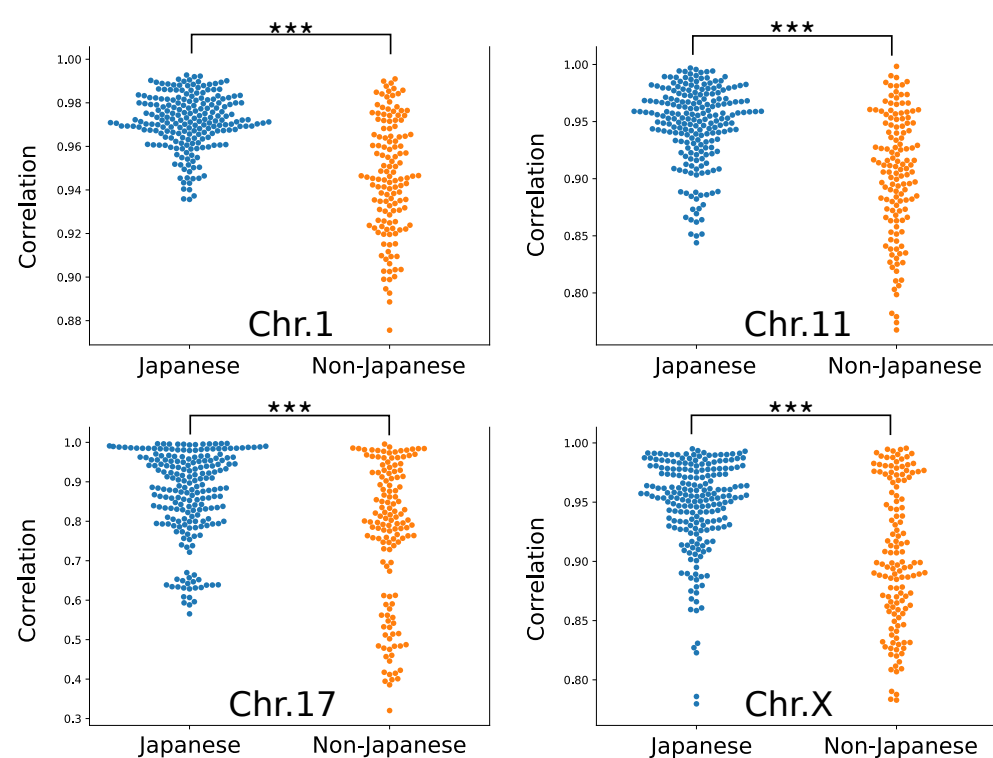

**Fig S14. Pairwise (Pearson) correlation of SNV frequencies among samples.** Statistically significant differences are marked with asterisks. (A) Comparison between the correlation coefficients among samples within a trio (blue; HG005-7, Han Chinese) and others (orange). (B) Comparison between the correlation among Japanese (blue), and those among others (orange).

**A**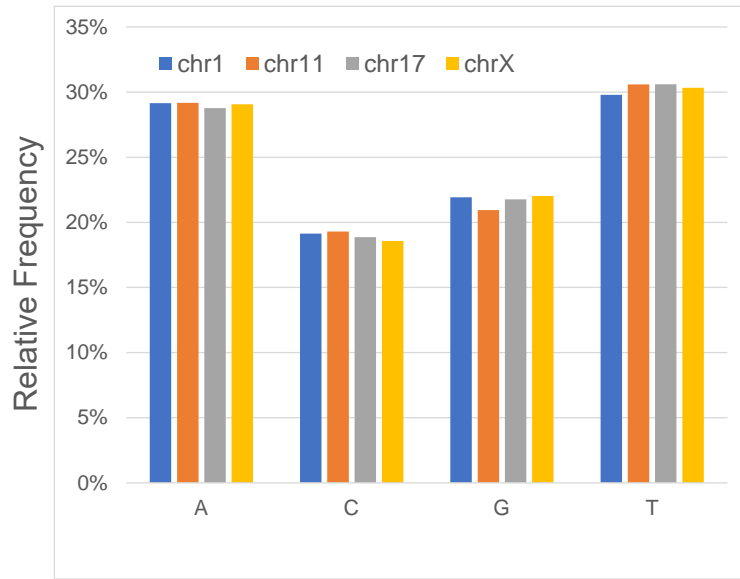**B**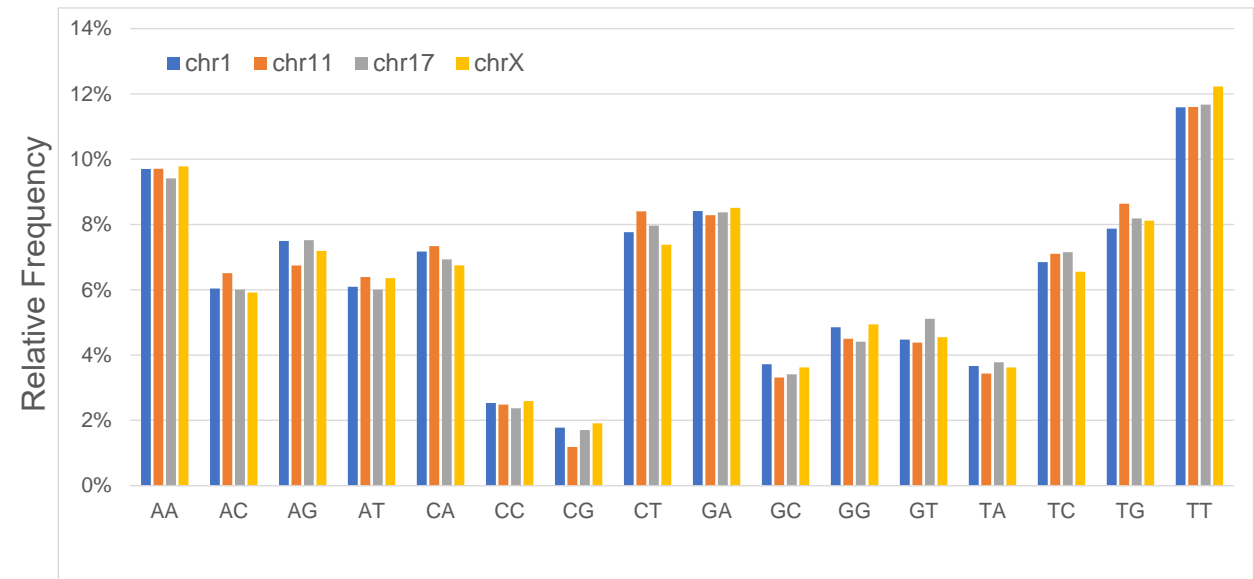

**Fig S15. Sequence composition of canonical HORs of the four chromosomes.**

(A) Base frequency and (B) 2-mer frequency are shown.



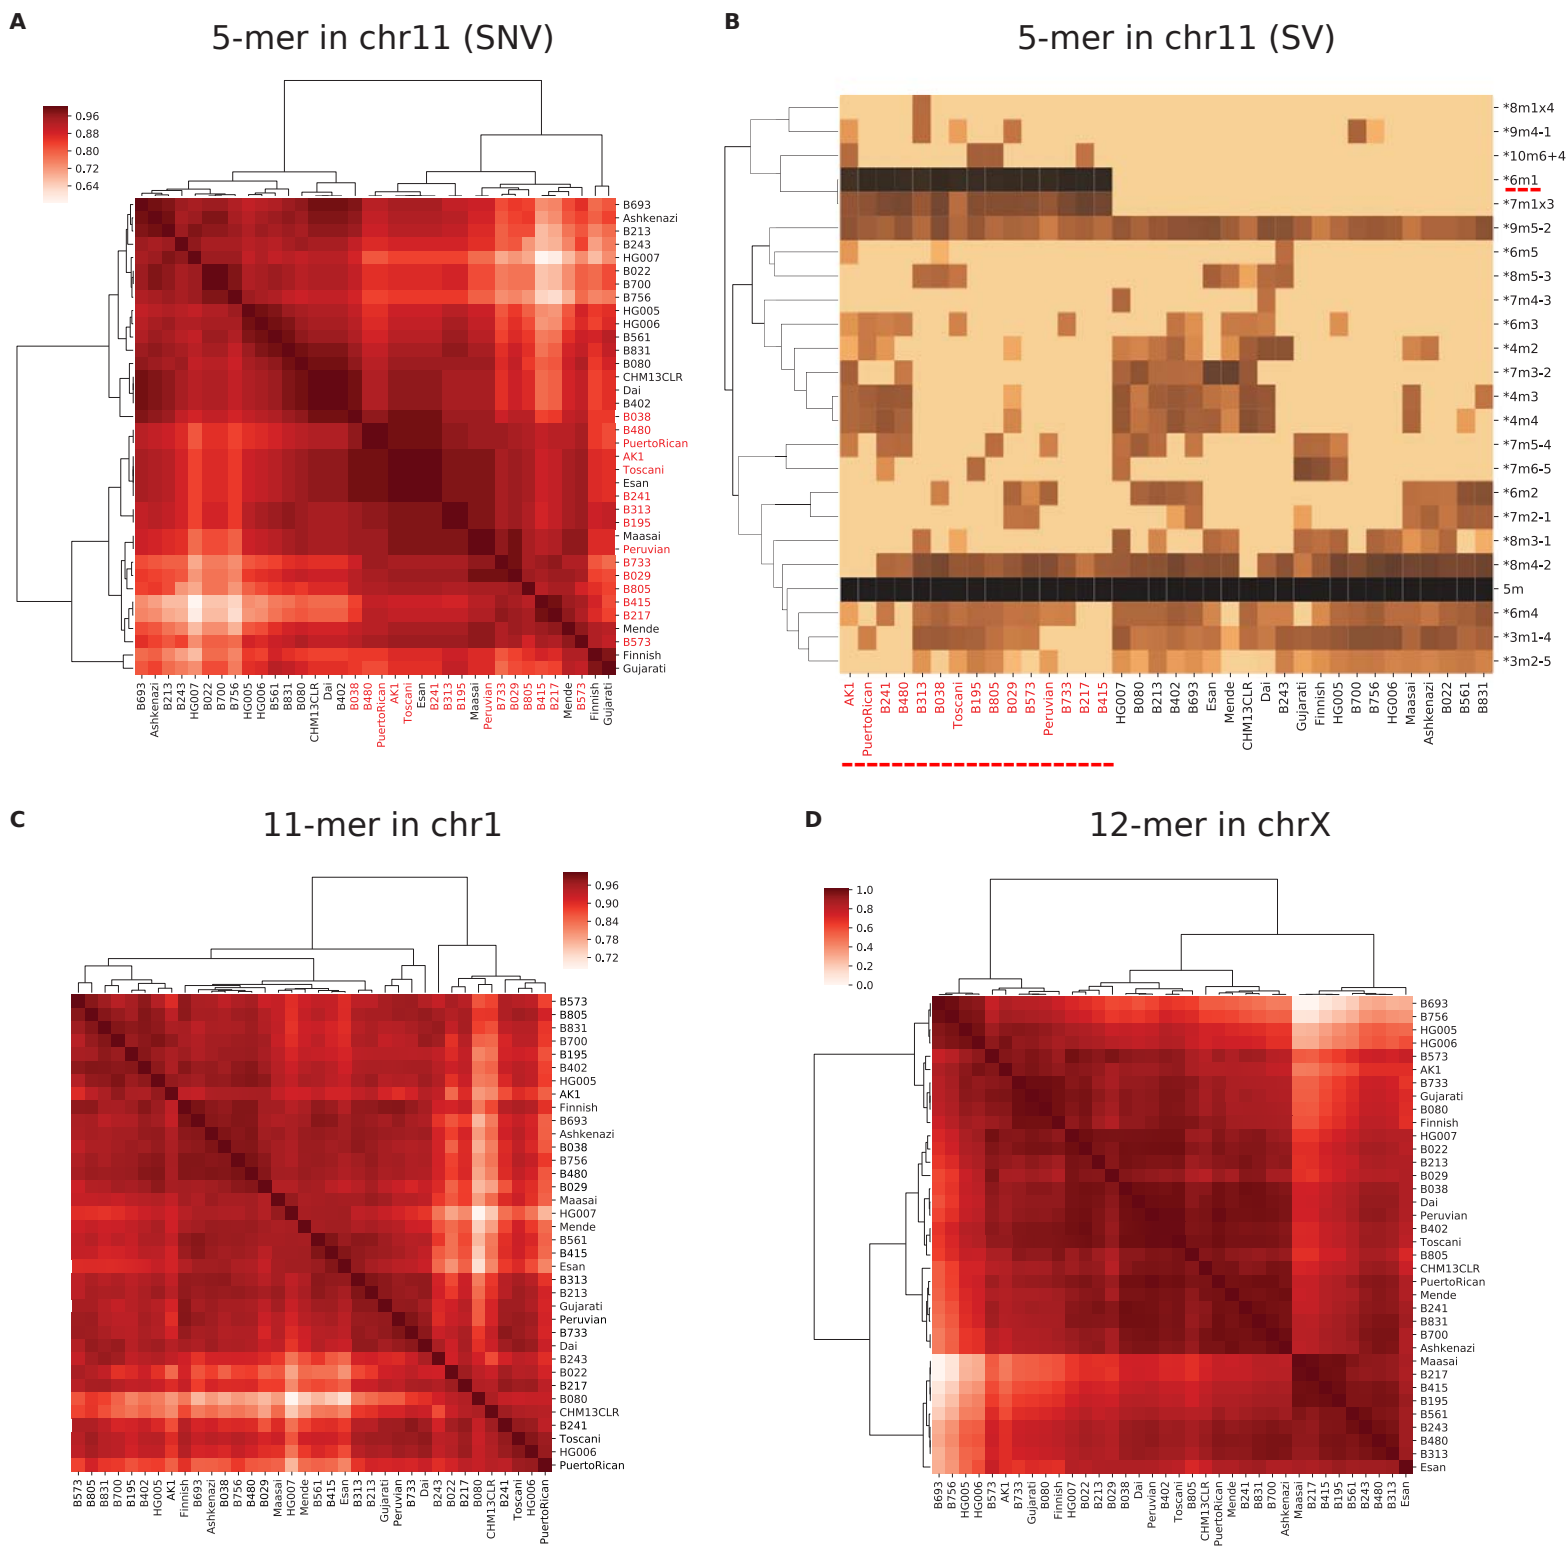

**Fig S16. Analysis of SNVs detected on the canonical HORs. (A, C, D)** Correlation of SNV frequencies among samples on the canonical HORs, (A) 5-mer in chromosome 11, (C) 11-mer in chromosome 1, and (D) 12-mer in chromosome X. In (A), sample labels are colored with red if the sample contains 6m1 variant HORs. **(B)** Occurrence of variant HORs in each sample serves as a fingerprint of the distinct haplotypes. SVs were clustered by co-occurrence over the samples. Two marker variant HORs, 6m1 and 7m1x3, were observed only in a subset of samples defining a characteristic haplotype, which are labelled with red.

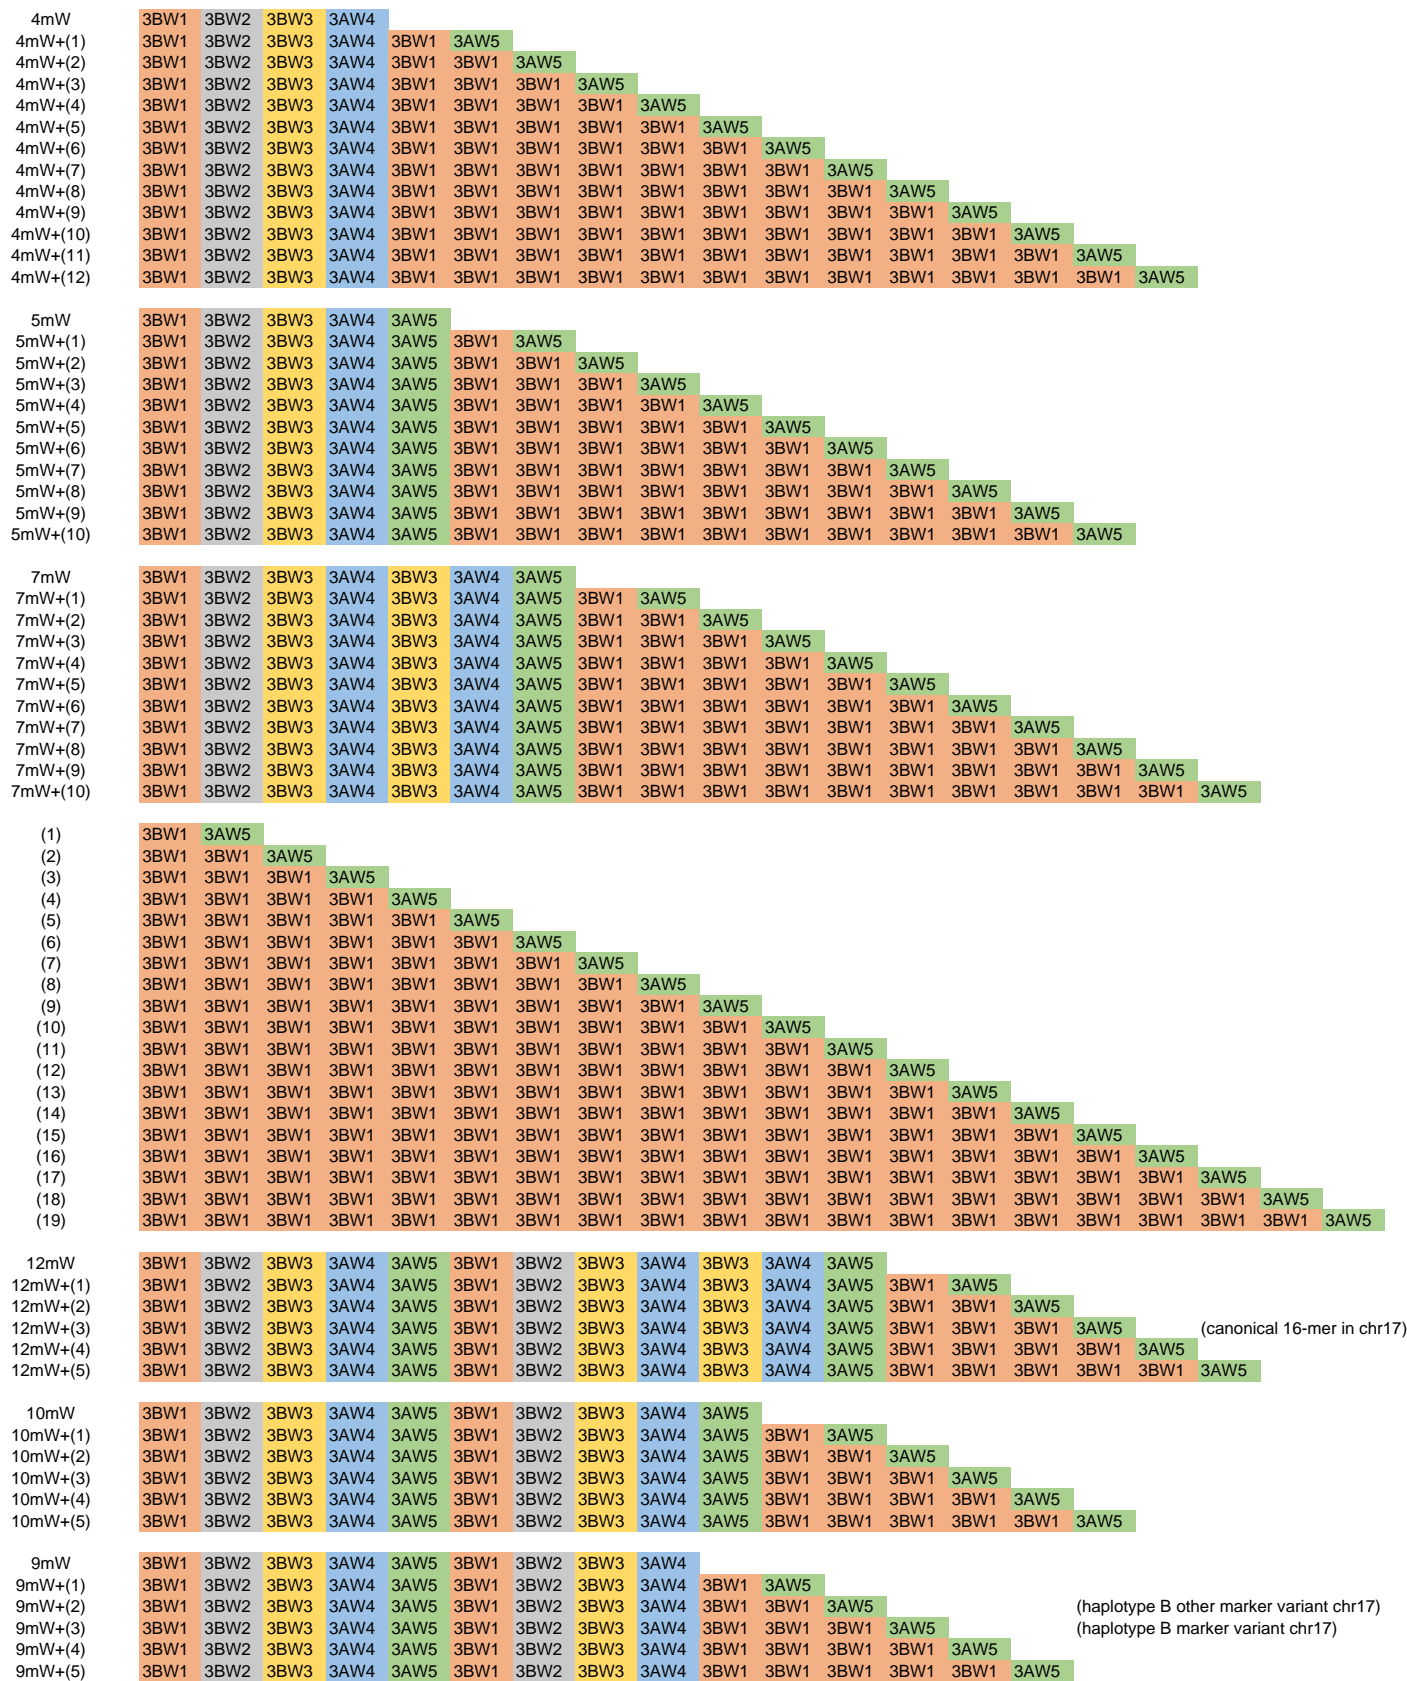

**Fig S17. HOR patterns defined for studying centromeric repeats in humans and chimpanzees.** The structure of HORs are presented in each row. The rectangles represent the presence of alphoid monomers, whose classes are written on the rectangles. No gap is allowed between two adjacent monomers to be detected as a variant HOR unit.

AA AB BB

| * *         | Clint   | Esan     | Maasai   | Gujarati | Mende    | Toscani  | Ashkenazi | Finnish  | Dai      | HG005    | PuertoRican | Peruvian               |
|-------------|---------|----------|----------|----------|----------|----------|-----------|----------|----------|----------|-------------|------------------------|
| 1 nMons     | 3845573 | 19253041 | 16812971 | 17412128 | 19686565 | 21792096 | 14454006  | 26619252 | 15015579 | 21598986 | 35456165    | 26396834               |
| 1 nReads    | 63041   | 201918   | 168447   | 172521   | 371798   | 280734   | 228847    | 324782   | 158328   | 393744   | 313677      | 388264                 |
| 4 4mW       | 25939   | 12359    | 12503    | 13637    | 20280    | 27632    | 8810      | 26087    | 10436    | 18066    | 34745       | 26131                  |
| 6 4mW+(1)   | 1641    | 31       | 54       | 28       | 28       | 41       | 31        | 37       | 22       | 54       | 84          | 29                     |
| 7 4mW+(2)   | 11792   | 175      | 187      | 41       | 1        | 1        | 0         | 0        | 0        | 1        | 59          | 1                      |
| 8 4mW+(3)   | 1867    | 848      | 1610     | 562      | 2        | 0        | 2         | 0        | 0        | 0        | 1833        | 0                      |
| 9 4mW+(4)   | 246     | 18       | 21       | 6        | 0        | 0        | 0         | 0        | 0        | 0        | 0           | 0                      |
| 10 4mW+(5)  | 214     | 0        | 0        | 0        | 0        | 0        | 0         | 0        | 0        | 0        | 0           | 0                      |
| 11 4mW+(6)  | 345     | 0        | 0        | 0        | 0        | 0        | 0         | 0        | 0        | 0        | 0           | 0                      |
| 12 4mW+(7)  | 53      | 0        | 0        | 0        | 0        | 0        | 0         | 0        | 0        | 0        | 0           | 0                      |
| 13 4mW+(8)  | 29      | 0        | 0        | 0        | 0        | 0        | 0         | 0        | 0        | 0        | 0           | 0                      |
| 14 4mW+(9)  | 25      | 0        | 0        | 0        | 0        | 0        | 0         | 0        | 0        | 0        | 0           | 0                      |
| 15 4mW+(10) | 13      | 0        | 0        | 0        | 0        | 0        | 0         | 0        | 0        | 0        | 0           | 0                      |
| 16 4mW+(11) | 0       | 0        | 0        | 0        | 0        | 0        | 0         | 0        | 0        | 0        | 0           | 0                      |
| 17 4mW+(12) | 3       | 0        | 0        | 0        | 0        | 0        | 0         | 0        | 0        | 0        | 0           | 0                      |
| 5 5mW       | 4437    | 26953    | 30170    | 31087    | 47923    | 63167    | 17959     | 58842    | 27660    | 39699    | 89417       | 66527                  |
| 7 5mW+(1)   | 21      | 97       | 96       | 262      | 91       | 120      | 47        | 239      | 52       | 136      | 193         | 120                    |
| 8 5mW+(2)   | 17      | 226      | 26       | 44       | 61       | 83       | 34        | 116      | 108      | 82       | 126         | 86                     |
| 9 5mW+(3)   | 329     | 44       | 24       | 61       | 101      | 76       | 53        | 99       | 57       | 59       | 133         | 125                    |
| 10 5mW+(4)  | 288     | 0        | 40       | 0        | 0        | 0        | 0         | 0        | 0        | 0        | 0           | 33                     |
| 11 5mW+(5)  | 364     | 0        | 0        | 0        | 0        | 0        | 0         | 0        | 0        | 0        | 0           | 0                      |
| 12 5mW+(6)  | 34      | 0        | 0        | 0        | 0        | 0        | 0         | 0        | 0        | 0        | 0           | 0                      |
| 13 5mW+(7)  | 39      | 0        | 0        | 0        | 0        | 0        | 0         | 0        | 0        | 0        | 0           | 0                      |
| 14 5mW+(8)  | 15      | 0        | 0        | 0        | 0        | 0        | 0         | 0        | 0        | 0        | 0           | 0                      |
| 15 5mW+(9)  | 10      | 0        | 0        | 0        | 0        | 0        | 0         | 0        | 0        | 0        | 0           | 0                      |
| 16 5mW+(10) | 0       | 0        | 0        | 0        | 0        | 0        | 0         | 0        | 0        | 0        | 0           | 0                      |
| 7 7mW       | 9936    | 19669    | 19681    | 19678    | 24628    | 22008    | 17751     | 26769    | 17277    | 19845    | 39494       | 26427                  |
| 9 7mW+(1)   | 1464    | 15104    | 14389    | 14064    | 14740    | 12683    | 12289     | 16759    | 10579    | 10502    | 27162       | 15223                  |
| 10 7mW+(2)  | 3664    | 423      | 303      | 278      | 390      | 483      | 323       | 565      | 308      | 543      | 922         | 660                    |
| 11 7mW+(3)  | 3270    | 845      | 1287     | 1212     | 3366     | 3057     | 2511      | 3306     | 2852     | 3638     | 3363        | 3647                   |
| 12 7mW+(4)  | 83      | 69       | 19       | 19       | 95       | 61       | 67        | 91       | 46       | 65       | 236         | 105                    |
| 13 7mW+(5)  | 77      | 1        | 8        | 7        | 8        | 6        | 3         | 11       | 16       | 7        | 27          | 13                     |
| 14 7mW+(6)  | 34      | 0        | 0        | 0        | 0        | 0        | 0         | 0        | 0        | 0        | 0           | 0                      |
| 15 7mW+(7)  | 2       | 0        | 0        | 0        | 0        | 0        | 0         | 0        | 0        | 0        | 0           | 0                      |
| 16 7mW+(8)  | 0       | 0        | 0        | 0        | 0        | 0        | 0         | 0        | 0        | 0        | 0           | 0                      |
| 17 7mW+(9)  | 0       | 0        | 0        | 0        | 0        | 0        | 0         | 0        | 0        | 0        | 0           | 0                      |
| 18 7mW+(10) | 0       | 0        | 0        | 0        | 0        | 0        | 0         | 0        | 0        | 0        | 0           | 0                      |
| 2 (1)       | 17002   | 40092    | 40283    | 38132    | 44386    | 45730    | 34463     | 56340    | 32473    | 37851    | 80224       | 51640                  |
| 3 (2)       | 25068   | 8400     | 8744     | 5204     | 6503     | 7343     | 5296      | 9761     | 5975     | 7983     | 17572       | 10423                  |
| 4 (3)       | 10229   | 25458    | 42479    | 27371    | 37767    | 37862    | 30532     | 48342    | 41228    | 40193    | 79032       | 49082                  |
| 5 (4)       | 5667    | 1492     | 560      | 316      | 623      | 545      | 496       | 746      | 434      | 389      | 1808        | 683                    |
| 6 (5)       | 1866    | 18       | 95       | 111      | 71       | 83       | 55        | 104      | 94       | 61       | 352         | 160                    |
| 7 (6)       | 761     | 0        | 0        | 1        | 4        | 0        | 0         | 0        | 0        | 0        | 0           | 0                      |
| 8 (7)       | 228     | 0        | 0        | 0        | 0        | 0        | 0         | 0        | 0        | 0        | 0           | 0                      |
| 9 (8)       | 125     | 0        | 0        | 0        | 0        | 0        | 0         | 0        | 0        | 0        | 0           | 0                      |
| 10 (9)      | 65      | 0        | 0        | 0        | 0        | 0        | 0         | 0        | 0        | 0        | 0           | 0                      |
| 11 (10)     | 32      | 0        | 0        | 0        | 0        | 0        | 0         | 0        | 0        | 0        | 0           | 0                      |
| 12 (11)     | 18      | 0        | 0        | 0        | 0        | 0        | 0         | 0        | 0        | 0        | 0           | 0                      |
| 13 (12)     | 7       | 0        | 0        | 0        | 0        | 0        | 0         | 0        | 0        | 0        | 0           | 0                      |
| 14 (13)     | 5       | 0        | 0        | 0        | 0        | 0        | 0         | 0        | 0        | 0        | 0           | 0                      |
| 15 (14)     | 36      | 0        | 0        | 0        | 0        | 0        | 0         | 0        | 0        | 0        | 0           | 0                      |
| 16 (15)     | 24      | 0        | 0        | 0        | 0        | 0        | 0         | 0        | 0        | 0        | 0           | 0                      |
| 17 (16)     | 5       | 0        | 0        | 0        | 0        | 0        | 0         | 0        | 0        | 0        | 0           | 0                      |
| 18 (17)     | 1       | 0        | 0        | 0        | 0        | 0        | 0         | 0        | 0        | 0        | 0           | 0                      |
| 19 (18)     | 0       | 0        | 0        | 0        | 0        | 0        | 0         | 0        | 0        | 0        | 0           | 0                      |
| 20 (19)     | 1       | 0        | 0        | 0        | 0        | 0        | 0         | 0        | 0        | 0        | 0           | 0                      |
| 12 12mW     | 1973    | 43558    | 57130    | 50133    | 59740    | 59163    | 41108     | 75436    | 62653    | 53842    | 113338      | 78414                  |
| 14 12mW+(1) | 0       | 6934     | 7786     | 4686     | 5215     | 6571     | 5388      | 7547     | 6395     | 5101     | 10542       | 7797                   |
| 15 12mW+(2) | 69      | 3278     | 3285     | 2274     | 2680     | 2713     | 2391      | 4297     | 2889     | 3308     | 9177        | 4495                   |
| 16 12mW+(3) | 250     | 9648     | 14100    | 13326    | 21292    | 20891    | 19318     | 28346    | 27502    | 21872    | 34745       | 28288 (canonical)      |
| 17 12mW+(4) | 1       | 865      | 293      | 166      | 307      | 235      | 287       | 329      | 252      | 163      | 1021        | 294                    |
| 18 12mW+(5) | 0       | 9        | 69       | 75       | 37       | 54       | 29        | 47       | 59       | 33       | 213         | 91                     |
| 10 10mW     | 6154    | 67673    | 57128    | 96882    | 69534    | 94046    | 39560     | 91049    | 55455    | 61340    | 175824      | 104190                 |
| 12 10mW+(1) | 0       | 1        | 2        | 363      | 1        | 0        | 15        | 188      | 0        | 32       | 22          | 0                      |
| 13 10mW+(2) | 0       | 0        | 0        | 12       | 0        | 13       | 8         | 0        | 0        | 0        | 0           | 0                      |
| 14 10mW+(3) | 0       | 0        | 0        | 217      | 427      | 382      | 227       | 587      | 338      | 235      | 1021        | 527                    |
| 15 10mW+(4) | 0       | 0        | 0        | 0        | 0        | 0        | 0         | 0        | 0        | 0        | 0           | 12                     |
| 16 10mW+(5) | 0       | 0        | 0        | 0        | 0        | 0        | 0         | 0        | 0        | 0        | 0           | 0                      |
| 9 9mW       | 846     | 29451    | 45389    | 30175    | 28413    | 31976    | 13805     | 37534    | 20020    | 25802    | 74545       | 37673                  |
| 11 9mW+(1)  | 0       | 0        | 160      | 4        | 2        | 9        | 2         | 7        | 2        | 0        | 10          | 5                      |
| 12 9mW+(2)  | 0       | 1823     | 2446     | 588      | 4        | 4        | 0         | 5        | 2        | 2        | 729         | 3 (haplotype B marker) |
| 13 9mW+(3)  | 0       | 9266     | 19420    | 6268     | 22       | 0        | 9         | 0        | 0        | 1        | 20227       | 0 (haplotype B marker) |
| 14 9mW+(4)  | 0       | 249      | 97       | 44       | 0        | 0        | 0         | 0        | 0        | 0        | 0           | 0                      |
| 15 9mW+(5)  | 0       | 0        | 0        | 0        | 0        | 0        | 0         | 0        | 0        | 0        | 0           | 0                      |
| 2 2mJ       | 563347  | 1950235  | 1692087  | 1721596  | 2059205  | 2180100  | 1738661   | 2778859  | 1528487  | 2310682  | 4126444     | 2645085                |
| 2 2mD       | 115735  | 3312078  | 2695348  | 2775544  | 2958758  | 3182308  | 1784263   | 4186888  | 2347457  | 3367703  | 5033049     | 4509999                |

**Fig S18. Frequencies of detected HOR patterns (definitions in Fig.S15) in centromeric repeats in humans and chimpanzees.** Data for human samples are colored based on the inferred genotypes for the chromosome 17 centromere. 12mW+(3) is the same pattern as the canonical "16m" in chromosome 17, while 9mW+(3) and 9mW+(2) are markers for haplotype B. The chimpanzee (Clint) shares some haplotype-B-specific patterns such as 4mW+(2) and 4mW+(3) with humans, and contains tandemly repeating "3BW1" (numbers in red).

CENP-B box

YTTCTTAAACGGAA

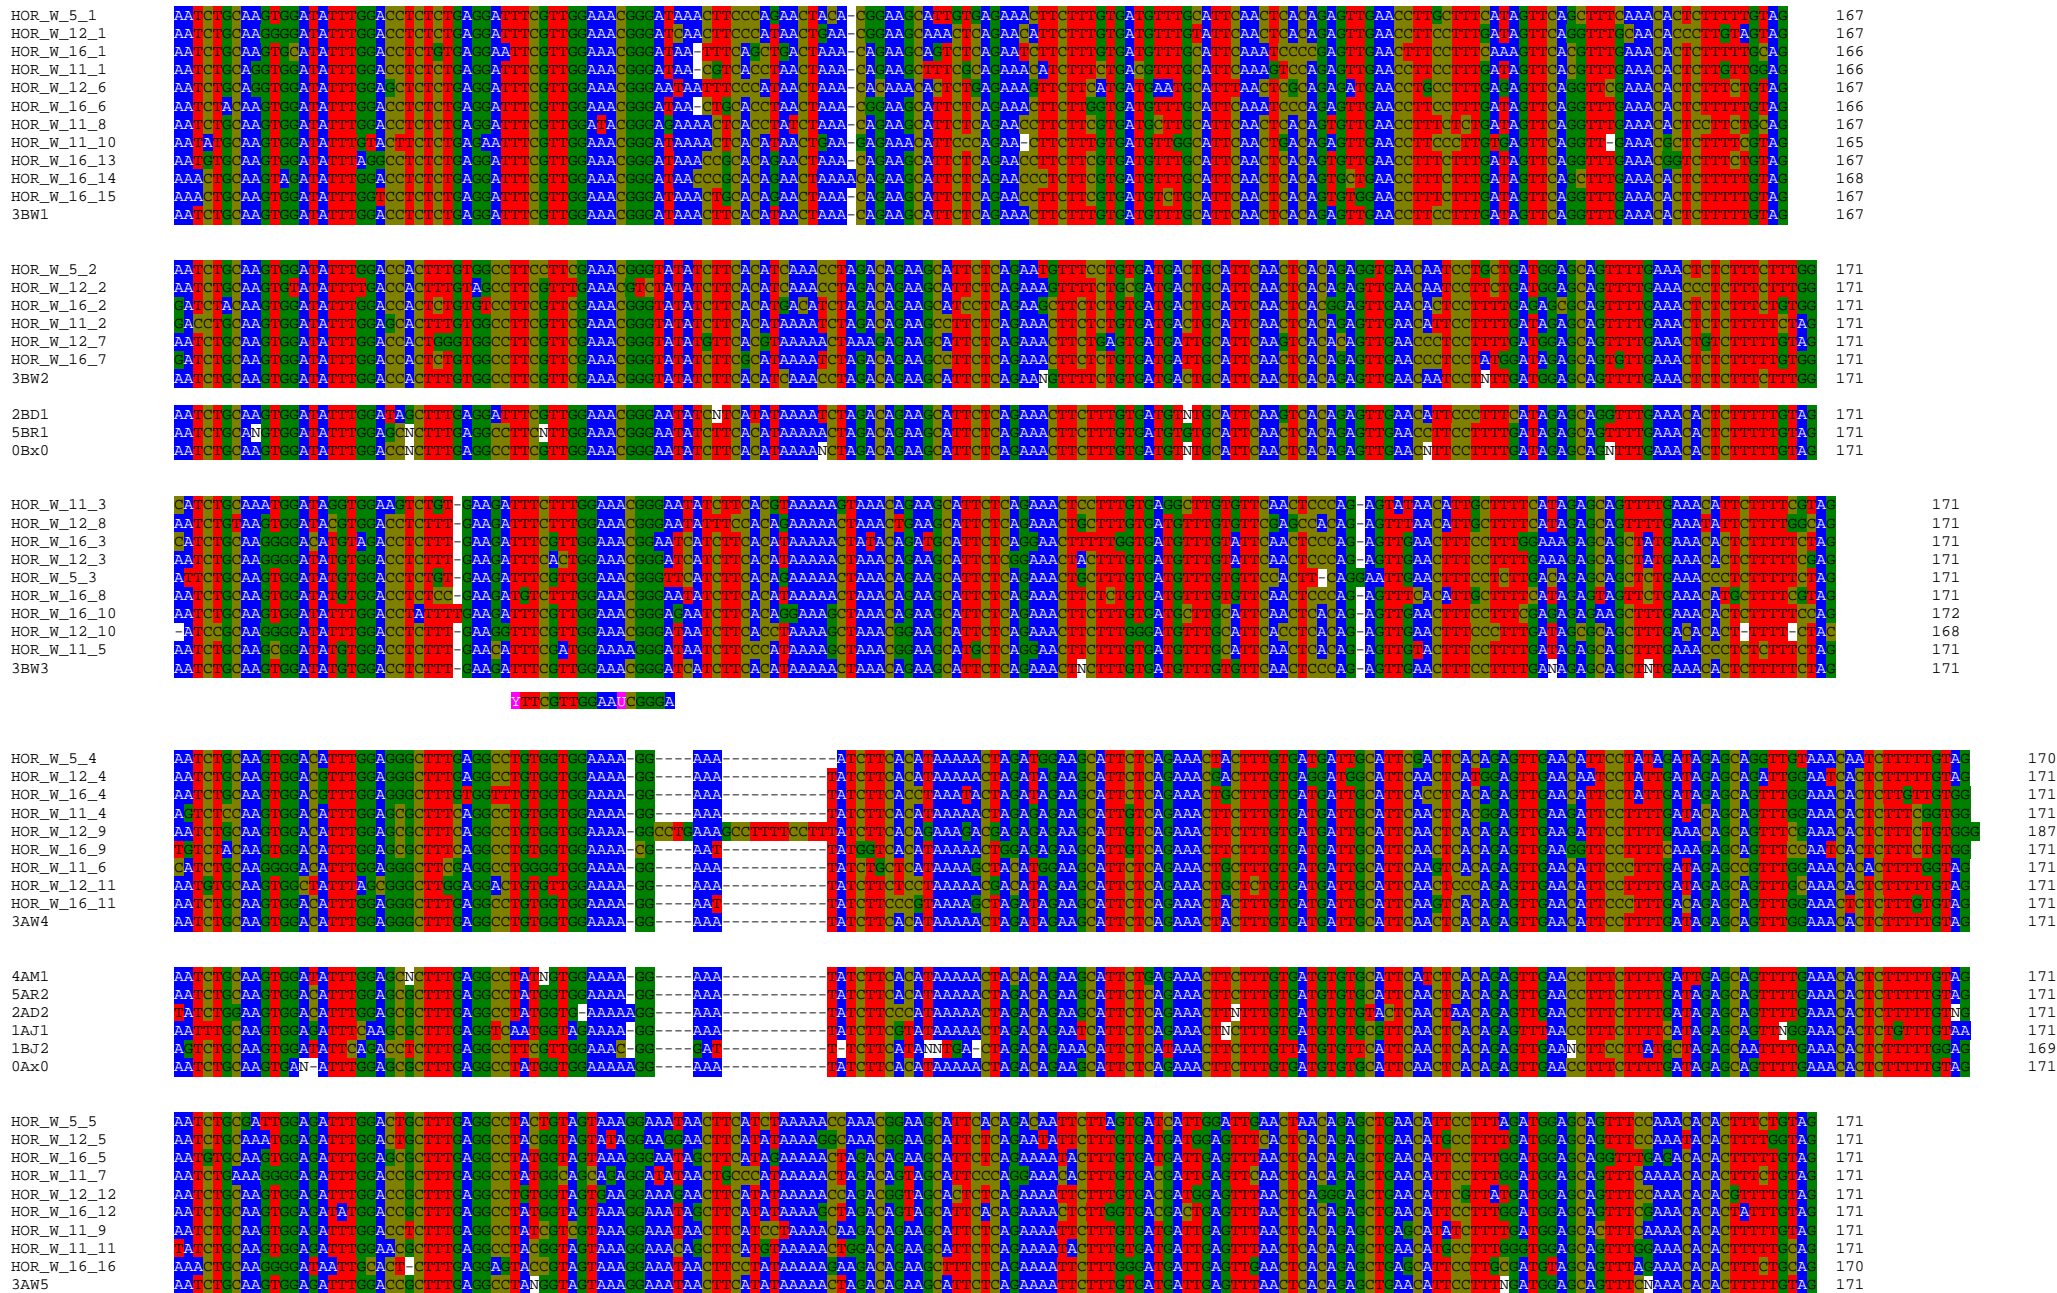

Fig S19. Structures of 58 chromosome-specific monomers. Six clusters of multiple alignments of 58 monomers and generic monomers are shown.

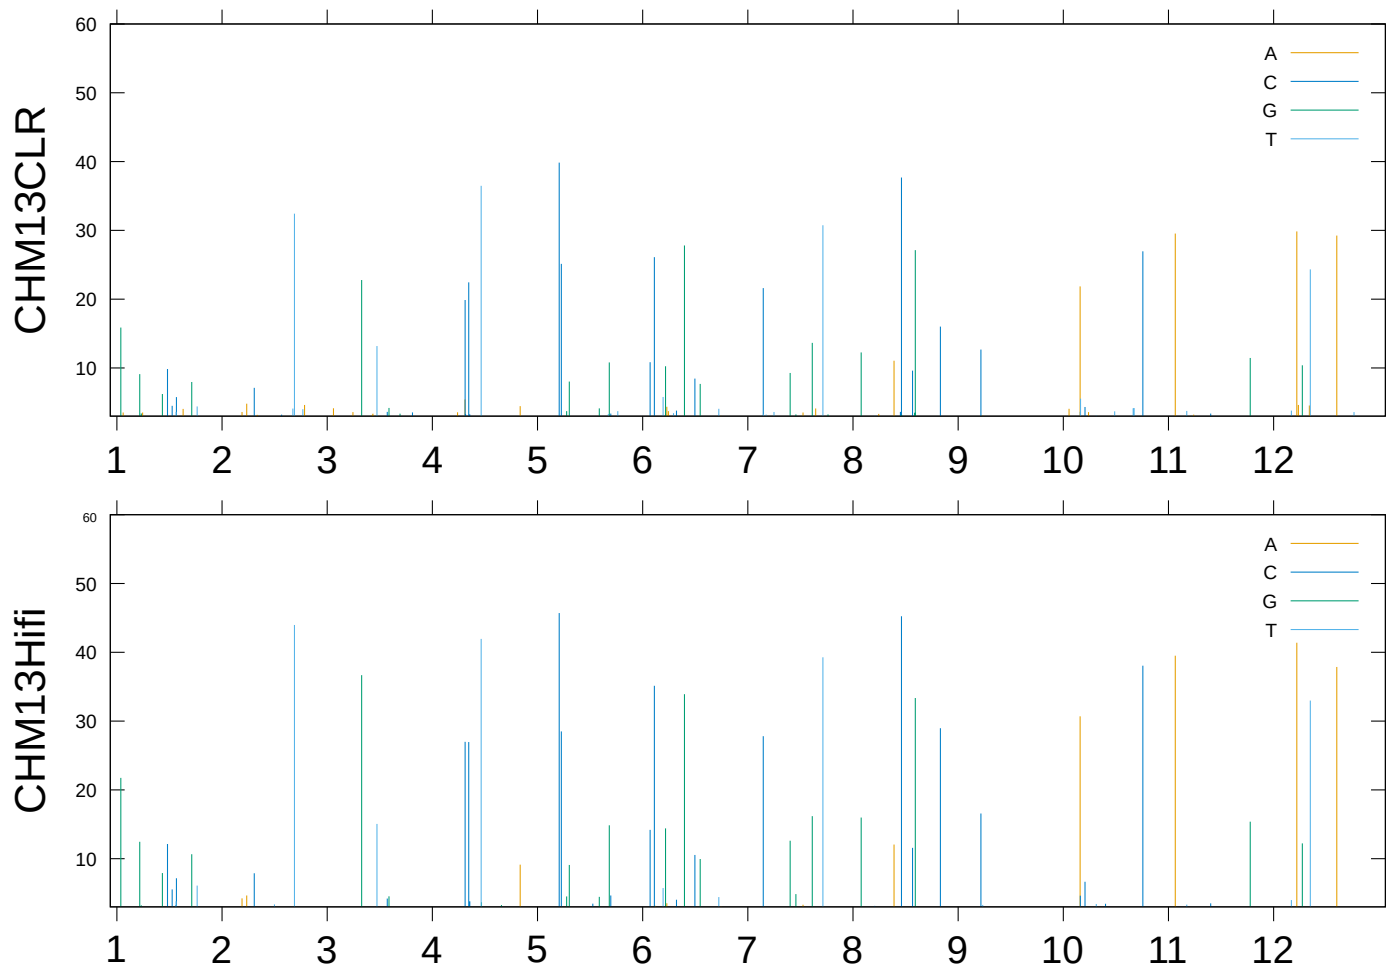

**Fig S20. Comparison of SNV landscape over the 12-mer canonical HOR in chromosome X detected with CLR reads and HiFi reads for the CHM13.**

SNV with frequency of >3% are shown. x-axis is labelled with monomer index, but the actual coordinate represents position and base; for example, the alternative "G" at 20th base of 2nd monomer is plotted at  $x = 3 (G \text{ for } G) + (20 * 4) + (2 * 800) = 1683$ . y-axis is the observed frequency in percentage. Four colors are used to distinguish four bases.

|                             | Mende<br>Sierra Leone | Esan<br>Kenya | Maasai      | Ashkenazi<br>(HG002) | Toscani<br>Italy | Finnish     | Gujarati<br>India | Dai Chinese | Han Chinese<br>(HG005) | Han Chinese<br>(HG006) | Han Chinese<br>(HG007) | Puerto Rican | Peruvian    | Chimpanzee<br>(Clint) | NA12878<br>(HiFi) |
|-----------------------------|-----------------------|---------------|-------------|----------------------|------------------|-------------|-------------------|-------------|------------------------|------------------------|------------------------|--------------|-------------|-----------------------|-------------------|
| <b>Project / Experiment</b> | PRJNA438669           | PRJNA530216   | PRJNA530217 | PRJNA558394          | PRJNA530212      | PRJNA480712 | PRJNA530214       | PRJNA547614 | SRX4739017             | SRX4739121             | SRX4739122             | PRJNA483067  | PRJNA480858 |                       | PRJNA540705       |
| <b>Runs</b>                 | SRR8035307            | SRR9685168    | SRR9685183  | SRR9972588           | SRR9677471       | SRR7511979  | SRR9683639        | SRR9212151  | SRR8955269             | SRR8955270             | SRR8955271             | SRR7615963   | SRR7515657  | SRR5269206            | SRR9001768        |
|                             | SRR8035309            | SRR9685169    | SRR9685184  | SRR9972589           | SRR9677472       | SRR7511980  | SRR9683640        |             |                        |                        |                        |              | SRR7515658  | SRR5269207            | SRR9001769        |
|                             | SRR8035310            | SRR9685170    | SRR9685185  |                      | SRR9677473       | SRR7511981  | SRR9683641        |             |                        |                        |                        |              | SRR7515659  | SRR5269208            | SRR9001770        |
|                             | SRR8035311            | SRR9685171    | SRR9685186  |                      | SRR9677474       | SRR7511982  | SRR9683642        |             |                        |                        |                        |              | SRR7515660  | SRR5269209            | SRR9001771        |
|                             | SRR8035312            | SRR9685172    | SRR9685187  |                      | SRR9677475       | SRR7511983  | SRR9683643        |             |                        |                        |                        |              | SRR7515661  | SRR5269210            | SRR9001772        |
|                             | SRR8035313            | SRR9685173    | SRR9685188  |                      | SRR9677476       | SRR7511984  | SRR9683644        |             |                        |                        |                        |              | SRR7515662  | SRR5269211            | SRR9001773        |
|                             | SRR8035314            | SRR9685174    | SRR9685189  |                      | SRR9677477       | SRR7511985  | SRR9683645        |             |                        |                        |                        |              | SRR7515663  | SRR5269212            |                   |
|                             | SRR8035315            | SRR9685175    | SRR9685190  |                      | SRR9677478       | SRR7511986  | SRR9683646        |             |                        |                        |                        |              | SRR7515664  | SRR5269213            |                   |
|                             | SRR8035316            | SRR9685176    | SRR9685191  |                      | SRR9677479       | SRR7511987  | SRR9683647        |             |                        |                        |                        |              | SRR7515665  | SRR5269214            |                   |
|                             | SRR8035317            | SRR9685177    | SRR9685192  |                      | SRR9677480       | SRR7511988  | SRR9683648        |             |                        |                        |                        |              | SRR7515666  | SRR5269215            |                   |
|                             | SRR8035318            | SRR9685178    | SRR9685193  |                      | SRR9677481       | SRR7511989  | SRR9683649        |             |                        |                        |                        |              | SRR7515667  | SRR5269216            |                   |
|                             | SRR8035319            | SRR9685179    | SRR9685194  |                      | SRR9677482       | SRR7511990  | SRR9683650        |             |                        |                        |                        |              | SRR7515668  | SRR5269217            |                   |
|                             | SRR8035320            | SRR9685180    |             |                      | SRR9677483       | SRR7511991  | SRR9683651        |             |                        |                        |                        |              | SRR7515669  | SRR5269218            |                   |
|                             | SRR8035321            | SRR9685181    |             |                      | SRR9677484       | SRR7511992  |                   |             |                        |                        |                        |              | SRR7515670  | SRR5269219            |                   |
|                             | SRR8035322            | SRR9685182    |             |                      | SRR9677485       | SRR7511993  |                   |             |                        |                        |                        |              | SRR7515671  | SRR5269439            |                   |
|                             | SRR8035323            |               |             |                      | SRR9677486       | SRR7511994  |                   |             |                        |                        |                        |              | SRR7515672  | SRR5269440            |                   |
|                             | SRR8035324            |               |             |                      | SRR9677487       | SRR7511995  |                   |             |                        |                        |                        |              | SRR7515673  | SRR5269441            |                   |
|                             | SRR8035325            |               |             |                      | SRR9677488       | SRR7511996  |                   |             |                        |                        |                        |              | SRR7515674  | SRR5269442            |                   |
|                             | SRR8035326            |               |             |                      | SRR9677489       | SRR7511997  |                   |             |                        |                        |                        |              | SRR7515675  | SRR5269443            |                   |
|                             | SRR8035327            |               |             |                      | SRR9677490       | SRR7511998  |                   |             |                        |                        |                        |              | SRR7515676  | SRR5269444            |                   |
|                             | SRR8035328            |               |             |                      | SRR9677491       | SRR7511999  |                   |             |                        |                        |                        |              | SRR7515677  | SRR5269445            |                   |
|                             | SRR8035329            |               |             |                      | SRR9677492       | SRR7512000  |                   |             |                        |                        |                        |              | SRR7515678  | SRR5269446            |                   |
|                             | SRR8035330            |               |             |                      | SRR9677493       | SRR7512001  |                   |             |                        |                        |                        |              | SRR7515679  | SRR5269447            |                   |
|                             | SRR8035331            |               |             |                      | SRR9677494       | SRR7512002  |                   |             |                        |                        |                        |              | SRR7515680  | SRR5269448            |                   |
|                             | SRR8035332            |               |             |                      | SRR9677495       | SRR7512003  |                   |             |                        |                        |                        |              | SRR7515681  | SRR5269449            |                   |
|                             | SRR8035333            |               |             |                      |                  | SRR7512004  |                   |             |                        |                        |                        |              | SRR7515682  | SRR5269450            |                   |
|                             | SRR8035334            |               |             |                      |                  | SRR7512005  |                   |             |                        |                        |                        |              | SRR7515683  | SRR5269451            |                   |
|                             | SRR8035335            |               |             |                      |                  | SRR7512006  |                   |             |                        |                        |                        |              | SRR7515684  | SRR5269452            |                   |
|                             | SRR8035336            |               |             |                      |                  | SRR7512007  |                   |             |                        |                        |                        |              | SRR7515685  | SRR5269453            |                   |
|                             | SRR8035337            |               |             |                      |                  | SRR7512008  |                   |             |                        |                        |                        |              | SRR7515686  | SRR5269454            |                   |
|                             | SRR8035338            |               |             |                      |                  |             |                   |             |                        |                        |                        |              | SRR7515687  | SRR5269455            |                   |
|                             | SRR8035339            |               |             |                      |                  |             |                   |             |                        |                        |                        |              | SRR7515688  | SRR5269456            |                   |
|                             | SRR8035340            |               |             |                      |                  |             |                   |             |                        |                        |                        |              | SRR7515689  | SRR5269457            |                   |
|                             | SRR8035341            |               |             |                      |                  |             |                   |             |                        |                        |                        |              | SRR7515690  | SRR5269458            |                   |
|                             | SRR8035342            |               |             |                      |                  |             |                   |             |                        |                        |                        |              | SRR7515691  | SRR5269459            |                   |
|                             | SRR8035343            |               |             |                      |                  |             |                   |             |                        |                        |                        |              | SRR7515692  | SRR5269460            |                   |
|                             | SRR8035344            |               |             |                      |                  |             |                   |             |                        |                        |                        |              | SRR7515693  | SRR5269461            |                   |
|                             | SRR8035345            |               |             |                      |                  |             |                   |             |                        |                        |                        |              | SRR7515694  | SRR5269462            |                   |
|                             | SRR8035346            |               |             |                      |                  |             |                   |             |                        |                        |                        |              | SRR7515695  | SRR5269463            |                   |
|                             | SRR8035347            |               |             |                      |                  |             |                   |             |                        |                        |                        |              | SRR7515696  | SRR5269464            |                   |
|                             | SRR8035348            |               |             |                      |                  |             |                   |             |                        |                        |                        |              | SRR7515697  | SRR5269465            |                   |
|                             | SRR8035349            |               |             |                      |                  |             |                   |             |                        |                        |                        |              | SRR7515698  | SRR5269466            |                   |
|                             | SRR8035350            |               |             |                      |                  |             |                   |             |                        |                        |                        |              | SRR7515699  | SRR5269467            |                   |
|                             | SRR8035351            |               |             |                      |                  |             |                   |             |                        |                        |                        |              | SRR7515700  | SRR5269468            |                   |
|                             | SRR8035352            |               |             |                      |                  |             |                   |             |                        |                        |                        |              | SRR7515701  | SRR5269469            |                   |
|                             | SRR8035353            |               |             |                      |                  |             |                   |             |                        |                        |                        |              |             | SRR5269470            |                   |
|                             | SRR8035354            |               |             |                      |                  |             |                   |             |                        |                        |                        |              |             | SRR5269471            |                   |
|                             | SRR8035355            |               |             |                      |                  |             |                   |             |                        |                        |                        |              |             | SRR5269472            |                   |
|                             | SRR8035356            |               |             |                      |                  |             |                   |             |                        |                        |                        |              |             |                       |                   |
|                             | SRR8035357            |               |             |                      |                  |             |                   |             |                        |                        |                        |              |             |                       |                   |
|                             | SRR8035358            |               |             |                      |                  |             |                   |             |                        |                        |                        |              |             |                       |                   |
|                             | SRR8035359            |               |             |                      |                  |             |                   |             |                        |                        |                        |              |             |                       |                   |

**Table S1. Accession IDs for publicly available sequencing data used in this study.**  
For 15 datasets, Project / Experiment IDs and Run IDs in the Sequence Read Archive are shown. Each dataset was sequenced with Sequel I/II in CLR mode unless otherwise mentioned.

| Monomer ID  | Sequence                                                                                                                                                                    |
|-------------|-----------------------------------------------------------------------------------------------------------------------------------------------------------------------------|
| 2BD1        | AATCTGCAAGTGGATATTTGGATAGCTTTGAGGATTTCTGTTGAAACGGGAATCNCATATAAAAATAGACAGAAAGCATTCTCAGAACTCTTTGTGATGNTGCATTCAAGTACACAGAGTTGAACATCCCTTTCATAGAGCAGGTTGAAACACTCTTTTGTAG         |
| 2AD2        | TATCTGGAAGTGGACATTTGGAGCGCTTTGAGGCTATGGTGGAAAAGGAAATATCTTCCATAAAAAATAGACAGAAAGCATTCTCAGAAACTTNTTTGTGATGTTGCATCAACTAACACAGAGTTGAACCTTTCTTTTGTATAGAGCAGTTTGAACACTCTTTTGTAG    |
| 1AJ1        | AATTTGCAAGTGGAGATTTCAAGAGCCTTTGAGGCTCAATGGTAAAGAAATATCTTGGATAAAAAATAGACAGAACTCACTTTGATGAGTGGCTTCAACTCACAGAGTTAACTCTTTTTCATAGAGCAGTTNGAAACACTCTTTTGTAA                       |
| 1BJ2        | AGTCTGCAAGTGGATATTCAGACCTCTTTGAGGCTTCGTTGAAACGGGATTTCTTCAANTNNGACTAGACAGAAACATTCTCATAAACTCTTTGTTATGTTGCATTCAACTCACAGAGTTGAACNTCTTATGCTAGAGCAATTTTGAACACTCTTTTGTAG           |
| 4AM1        | AATCTGCAAGTGGATATTTGGAGCCTTTGAGGCTATNGTGGAAAAGGAAATATCTTCCACATAAAAAATACACAGAAAGCATTCTGAGAACTCTTTGTGATGTTGCATTCACTCACAGAGTTGAACCTTTCTTTTGTATTGAGCAGTTTGAACACTCTTTTGTAG       |
| 5BR1        | AATCTGCANGTGGATATTTGGAGCCTTTGAGGCTTCNTTGGAAAACGGGAATCTTCCACATAAAAAATAGACAGAAAGCATTCTCAGAACTCTTTGTGATGTTGCATTCAACTCACAGAGTTGAACCTTTCTTTGTATAGAGCAGTTTGAACACTCTTTTGTAG        |
| 5AR2        | AATCTGCAAGTGGACATTTGGAGCGCTTTGAGGCTATGGTGGAAAAGGAAATATCTTCCACATAAAAAATAGACAGAAAGCATTCTCAGAACTCTTTGTGATGTTGCATTCAACTCACAGAGTTGAACCTTTCTTTTGTATAGAGCAGTTTGAACACTCTTTTGTAG     |
| 3BW1        | AATCTGCAAGTGGATATTTGGACCTCTCTGAGGATTTCTGTTGAAACGGGATAAATCTTCCACATAAATAAACAGAAAGCATTCTCAGAACTCTTTGTGATGTTGCATTCAACTCACAGAGTTGAACCTCTTTGTATAGTTTCAAGTTTGAACACTCTTTTGTAG       |
| 3BW2        | AATCTGCAAGTGGATATTTGGACCTCTCTGAGGCTTCGTTGAAACGGGATATCTTCCACATAAACTAGACAGAAAGCATTCTCAGAACTCTTTGTGATGTTGCATTCAACTCACAGAGTTGAACCTCTTTGTATAGTTTCAAGTTTGAACACTCTTTTGTAG          |
| 3BW3        | AATCTGCAAGTGGATATTTGGACCTCTCTGAGGATTTCTGTTGAAACGGGATCATCTTCCACATAAAAAATAGACAGAAAGCATTCTCAGAACTCTTTGTGATGTTGCATTCAACTCACAGAGTTGAACCTTTCTTTGTATAGAGCAGTTTGAACACTCTTTTGTAG     |
| 3AW4        | AATCTGCAAGTGGACATTTGGAGGCTTTGAGGCTGTTGGTGGAAAAGGAAATATCTTCCACATAAAAAATAGATAGAAGCATTCTCAGAACTCTTTGTGATGTTGCATTCAACTCACAGAGTTGAACATCCCTTTGTATAGAGCAGTTTGAACACTCTTTTGTAG       |
| 3AW5        | AATCTGCAAGTGGAGATTTGGAGCGCTTTGAGGCTTANGGTAGTAAAGGAAATAAATCTTCCATAAAAAATAGACAGAAAGCATTCTCAGAACTCTTTGTGATGTTGAGTTAACTCACAGAGCTGAACATCCCTTTNGATGGAGCAGTTTCAAAACACTCTTTTGTAG    |
| 0Ax0        | AATCTGCAAGTGANATTTGGAGCCTTTGAGGCTATGGTGGAAAAGGAAATATCTTCCACATAAAAAATAGACAGAAAGCATTCTCAGAACTCTTTGTGATGTTGCATTCAACTCACAGAGTTGAACCTTTCTTTGTATAGAGCAGTTTGAACACTCTTTTGTAG        |
| 0Bx0        | AATCTGCAAGTGGATATTTGGACNCTTTGAGGCTTCGTTGAAACGGGAAATCTTCCACATAAAAAATAGACAGAAAGCATTCTCAGAACTCTTTGTGATGTTGCATTCAACTCACAGAGTTGAACNTCTTTGTATAGAGCAGTTTGAACACTCTTTTGTAG           |
| HOR_W_11_1  | GATCTGCAAGTGGATATTTGGACCTCTCTGAGGATTTCTGTTGAAACGGGATAAATCTTCCATAAAAAATAGACAGAAAGCATTCTCAGAACTCTTTGTGATGTTGCATTCAAGTCCAGAGTTGAACCTCTTTGTATAGTTTCAAGTTTGAACACTCTTTTGTAG       |
| HOR_W_11_2  | GACCTGCAAGTGGATATTTGGAGCCTTTGAGGCTTCGTTGAAACGGGATATCTTCCACATAAAAAATAGACAGAAAGCATTCTCAGAACTCTTTGTGATGTTGCATTCAACTCACAGAGTTGAACATCCCTTTGTATAGAGCAGTTTGAACACTCTTTTGTAG         |
| HOR_W_11_3  | CATCTGCAAAATGGATAGTGGAGTCTGTTGAAAGTCTTTGTTGAAACGGGAAATCTTCCACGTA AAAAGTAAACAGAAAGCATTCTCAGAACTCTTTGTGAGGCTGTTGTTCAACTCCCAGAGTATAAATGCTTTTTCATAGAGCAGTTTGAACACTCTTTTGTAG     |
| HOR_W_11_4  | AGTCTCAAGTGGACATTTGGAGCGCTTTGAGGCTGTTGGTGGAAAAGGAAATATCTTCCACATAAAAAATAGACAGAAAGCATTCTCAGAACTCTTTGTGATGTTGCATTCAACTCACAGAGTTGAAGATCCCTTTGTATAGAGCAGTTTGAACACTCTTTTGTAG      |
| HOR_W_11_5  | AATCTGCAAGTGGATATTTGGAGCCTTTGAGGCTTCGATGAAAAGGGAATATCTTCCATAAAAAATAGACAGAAAGCATTCTCAGAACTCTTTGTGATGTTGCATTCAACTCACAGAGTTGATCTTTTGTATAGAGCAGTTTGAACACTCTTTTGTAG              |
| HOR_W_11_6  | CATCTGCAAGGGGACATTTGGAGGCTTCGAGGCTGGGTTGAAAAGGAAATATCTGCTCATAAAAAATAGACAGAAAGCATTCTCAGAACTCTTTGTGATGTTGCATTCAAGTCCAGAGTTGAACATCCCTTTGTATAGAGCAGTTTGAACACTCTTTTGTAG          |
| HOR_W_11_7  | AATCTGAAAAGGGGAGATTTGGAGCGCTTTGAGGCTATGGCAGCAGAGGATATAAATGCTTCCATAAAAAATAGACAGAAAGCATTCTCAGAACTCTTTGTGATGTTGCATTCAACTCACAGAGTTGAACATCCCTTTGTATAGAGCAGTTTGAACACTCTTTTGTAG    |
| HOR_W_11_8  | AATCTGCAAGTGGATATTTGGACCTCTCTGAGGATTTCTGTTGAAACGGGATAAATCTTCCACATAAAAAATAGACAGAAAGCATTCTCAGAACTCTTTGTGATGTTGCATTCAACTCACAGAGTTGAACATCCCTTTGTATAGAGCAGTTTGAACACTCTTTTGTAG    |
| HOR_W_11_9  | AATCTGCAAGTGGAGATTTGGACCTCTCTGAGGCTATCGTCTGAAAAGGAAATAAATCTTCCATAAAAAATAGACAGAAAGCATTCTCAGAACTCTTTGTGATGTTGAGTTAACTCACAGAGCTGAGCATATCTTTGTATAGAGCAGTTTGAACACTCTTTTGTAG      |
| HOR_W_11_10 | AATATGCAAGTGGATATTTGACTCTCTGAGAAATTTCTGTTGAAAACGGGATAAATCTTCCACATAAAAAATAGAAAGAAACATTCCAGAACTCTTTGTGATGTTGGCATTCAACTCACAGAGTTGAACCTCTTTGTGAGTTCAAGTTGAACACTCTTTTGTAG        |
| HOR_W_11_11 | TATCTGCAAGTGGAGATTTGGAAAGCCTTTGAGGCTACGGTATGAAAAGGAAACAGCTTCTTCCATAAAAAATAGACAGAAAGCATTCTCAGAACTCTTTGTGATGTTGAGTTAACTCACAGAGCTGAACATCCCTTTGGTGGAGCAGTTTGAACACTCTTTTGTAG     |
| HOR_W_11_12 | AATCTGCAAGTGGATATTTGGACCTCTCTGAGGATTTCTGTTGAAAACGGGATAAATCTTCCATAAAAAATAGAAAGCATTCTCAGAACTCTTTGTGATGTTGTTTCAACTCACAGAGTTGAACCTCTTTGTATAGTTTGAACACTCTTTTGTAG                 |
| HOR_W_12_2  | AATCTGCAAGTGTATATTTGACCACTTTGAGGCTTCGTTGAAAAGCCTTATATCTTCCACATAAAAAATAGACAGAAAGCATTCTCAGAAAGTCTTCTGCGATGACTGCATTCAACTCACAGAGTTGAACATCCCTTTGTATAGAGCAGTTTGAACACTCTTTTGTAG    |
| HOR_W_12_3  | AATCTGCAAGGGGATATGTTGAGCCTCTTTGAAAGTCTTCACTGAAAACGGGATCATCTTCCACATAAAAAATAGACAGAAAGCATTCTCAGAACTCTTTGTGATGTTGTTTCAACTCCCAGAGTTGAACCTCTTTTGTAAAGAGCAGCTATGAAACACTCTTTTGTAG   |
| HOR_W_12_4  | AATCTGCAAGTGGACATTTGGAGCGCTTTGAGGCTGTTGGTGGAAAAGGAAATATCTTCCACATAAAAAATAGATAGAAGCATTCTCAGAACTCTTTGTGAGGATGGCATTCAACTCACAGAGTTGAACATCCCTTTGTATAGAGCAGTTTGAACACTCTTTTGTAG     |
| HOR_W_12_5  | AATCTGCAAAATGGAGATTTGACCTGCTTTGAGGCTACGGTAGTATAGGAAGAACTTCAATATAAAAAAGCAACGGAAGCATTCTCAGAAATCTTTGTGATGTTGAGTTCAACTCACAGAGTTGAACATCCCTTTGTATAGAGCAGTTTGAACACTCTTTTGTAG       |
| HOR_W_12_6  | AATCTGCAAGTGGATATTTGGAGCTCTCTGAGGATTTCTGTTGAAAACGGGATAAATTTCCATAAAAAATAGACAGAAAGCATTCTCAGAACTCTTTGTGATGTTGAGTTAACTCGCAGAGATGAACCTGCTTTGAGAGTTCAAGTTTGAACACTCTTTTGTAG        |
| HOR_W_12_7  | AATCTGCAAGTGGATATTTGGACCTCTCTGAGGATTTCTGTTGAAAACGGGATAAATTTCCATAAAAAATAGACAGAAAGCATTCTCAGAACTCTTTGTGATGTTGAGTTAACTCACAGAGTTGAACCTCTTTGTATAGAGCAGTTTGAACACTCTTTTGTAG         |
| HOR_W_12_8  | AATCTGTAAGTGGATACGTGGACCTCTTTGAAAGTCTTTGTTGAAAACGGGATAAATTTCCACAGAAAATAGAACTGAAGCATTCTCAGAACTCTTTGTGATGTTGTTGCGCCACAGAGTTAACTGCTTTTTCATAGAGCAGTTTGAACACTCTTTTGTAG           |
| HOR_W_12_9  | AATCTGCAAGTGGACATTTGGAGCGCTTTGAGGCTGTTGGTGGAAAAGGCTGAAAAGCCTTTCTTCTTATCTTCCACAGAAAGCAGAGAGAAAGCATTCTCAGAACTCTTTGTGATGTTGAGTTCAACTCACAGAGTTGAAGATCCCTTTGAAACACTCTTTTGTAG     |
| HOR_W_12_10 | ATCGCAAGGGGATATTTGGACCTCTTTGAAAGTCTTTGTTGAAAACGGGATAAATCTTCCATAAAAAATAGACAGAAAGCATTCTCAGAACTCTTTGTGATGTTGAGTTTCAACTCACAGAGTTGAACATCCCTTTGTATAGAGCAGTTTGAACACTCTTTTGTAG      |
| HOR_W_12_11 | AATGTGCAAGTGGATATTTAGCGGCTTTGAGGAGCTGTTGTTGAAAAGGAAATATCTTCTTCCATAAAAAATAGACAGAAAGCATTCTCAGAACTCTTTGTGATGTTGAGTTTCAACTCCCAGAGTTGAACATCCCTTTGTATAGAGCAGTTTGAACACTCTTTTGTAG   |
| HOR_W_12_12 | AATCTGCAAGTGGAGATTTGGAGCCTTTGAGGCTGTTGGTAGTAAAGGAAATAGCTTCCATAAAAAATAGACAGAAAGCATTCTCAGAACTCTTTGTGATGTTGAGTTTCAACTCACAGAGTTGAACATCCCTTTGTATAGAGCAGTTTGAACACTCTTTTGTAG       |
| HOR_W_16_1  | AATCTGCAAGTGGATATTTGGAGCCTCTCTGAGGATTTCTGTTGAAAACGGGATAAATCTTCCACATAAAAAATAGACAGAAAGCATTCTCAGAACTCTTTGTGATGTTGAGTTTCAACTCACAGAGTTGAACATCCCTTTGTATAGAGCAGTTTGAACACTCTTTTGTAG |
| HOR_W_16_2  | GATCTACAAGTGGATATTTGGACCTCTCTGAGGATTTCTGTTGAAAACGGGATAAATCTTCCACATGACATAGACAGAAAGCATTCTCAGAACTCTTTGTGATGTTGAGTTTCAACTCACAGAGTTGAACACTCTTTGTATAGAGCAGTTTGAACACTCTTTTGTAG     |
| HOR_W_16_3  | CATCTGCAAGGGGACATGTTGAGCCTCTTTGAAAGTCTTTGTTGAAAACGGGATAAATCTTCCACATAAAAAATAGACAGAAAGCATTCTCAGAACTCTTTGTGATGTTGAGTTTCAACTCCCAGAGTTGAACCTCTTTGTAAAGAGCAGCTATGAAACACTCTTTTGTAG |
| HOR_W_16_4  | AATCTGCAAGTGGACATTTGGAGGCTTTGAGGCTGTTGGTGGAAAAGGAAATATCTTCCACATAAAAAATAGATAGAAGCATTCTCAGAACTCTTTGTGATGTTGAGTTTCAACTCACAGAGTTGAACATCCCTTTGTATAGAGCAGTTTGAACACTCTTTTGTAG      |
| HOR_W_16_5  | AATGTGCAAGTGGAGATTTGGAGCGCTTTGAGGCTATGGTAGTAAAGGAAATAGCTTCCATAAAAAATAGACAGAAAGCATTCTCAGAACTCTTTGTGATGTTGAGTTTCAACTCACAGAGTTGAACATCCCTTTGTATAGAGCAGTTTGAACACTCTTTTGTAG       |
| HOR_W_16_6  | AATCTACAAGTGGATATTTGGACCTCTCTGAGGATTTCTGTTGAAAACGGGATAAATGACCTTAACTAAACGGAAGCATTCTCAGAACTCTTTGGTGTGTTGATTTCAAAATCCAGAGTTGAACCTCTTTGTATAGTTTCAAGTTTGAACACTCTTTTGTAG          |
| HOR_W_16_7  | GATCTGCAAGTGGATATTTGGACCTCTCTGAGGATTTCTGTTGAAAACGGGATAAATCTTCCGATAAAAAATAGACAGAAAGCATTCTCAGAACTCTTTGTGATGTTGAGTTTCAACTCACAGAGTTGAACCTCTTATGGATAGAGCAGTTTGAACACTCTTTTGTAG    |
| HOR_W_16_8  | AATCTGCAAGTGGATATTTGGAGCCTCTGAGGATTTCTGTTGAAAACGGGATAAATCTTCCACATAAAAAATAGACAGAAAGCATTCTCAGAACTCTTTGTGATGTTGAGTTTCAACTCACAGAGTTTCAACATCCAGAGTTTGAACACTCTTTTGTAG             |
| HOR_W_16_9  | TGCTACAAGTGGACATTTGGAGCGCTTTGAGGCTGTTGGTGGAAAAGGAAATATGTTCCACATAAAAAATAGACAGAAAGCATTCTCAGAACTCTTTGTGATGTTGAGTTTCAACTCACAGAGTTGAAGTTCTTTTCAAGAGCAGTTTCAACACTCTTTTGTAG        |
| HOR_W_16_10 | AATCTGCAAGTGGATATTTGGACCTATTTGAAAGTCTTTGTTGAAAACGGGATAAATCTTCCACAGAAAGCATTCTCAGAACTCTTTGTGATGTTGAGTTTCAACTCACAGAGTTGAACCTCTTTGTATAGAGCAGTTTGAACACTCTTTTGTAG                 |
| HOR_W_16_11 | AATCTGCAAGTGGACATTTGGAGGCTTTGAGGCTGTTGGTGGAAAAGGAAATATCTTCCATAAAAAATAGACAGAAAGCATTCTCAGAACTCTTTGTGATGTTGAGTTTCAACTCACAGAGTTGAACATCCCTTTGTATAGAGCAGTTTGAACACTCTTTTGTAG       |
| HOR_W_16_12 | AATCTGCAAGTGGAGATATGGAGCGCTTTGAGGCTATGGTAGTAAAGGAAATAGCTTCCATAAAAAATAGACAGAAAGCATTCTCAGAACTCTTTGTGAGGATGAGTTTAACTCACAGAGTTGAACATCCCTTTGTATAGAGCAGTTTGAACACTCTTTTGTAG        |
| HOR_W_16_13 | AATGTGCAAGTGGATATTTAGGCTCTCTGAGGATTTCTGTTGAAAACGGGATAAATGACCTTAACTAAACGGAAGCATTCTCAGAACTCTTTGTGATGTTGAGTTTCAACTCACAGAGTTGAACCTCTTTGTATAGTTTCAAGTTTGAACACTCTTTTGTAG          |
| HOR_W_16_14 | AATCTGCAAGTGGATATTTGGAGCCTCTCTGAGGATTTCTGTTGAAAACGGGATAAATCTTCCACATAAAAAATAGACAGAAAGCATTCTCAGAACTCTTTGTGATGTTGAGTTTCAACTCACAGAGTTGAACATCCCTTTGTATAGAGCAGTTTGAACACTCTTTTGTAG |
| HOR_W_16_15 | AACTGCAAGTGGATATTTGGTCTCTCTGAGGATTTCTGTTGAAAACGGGATAAATGACCTTAACTAAACGGAAGCATTCTCAGAACTCTTTGTGATGTTGAGTTTCAACTCACAGAGTTGAACCTCTTTGTATAGTTTCAAGTTTGAACACTCTTTTGTAG           |
| HOR_W_16_16 | AATCTGCAAGGGGATATTTGACCTCTTTGAGGAGTACCGTAGTAAAGGAAATAGCTTCCATAAAAAATAGAAAGCATTCTCAGAACTCTTTGGGATGTTGAGTTTCAACTCACAGAGTTGAACATCCCTTTGCGATGTTAGAGTTTGAACACTCTTTTGTAG          |
| HOR_W_5_1   | AATCTGCAAGTGGATATTTGGAGCCTCTCTGAGGATTTCTGTTGAAAACGGGATAAATCTTCCACATAAAAAATAGACAGAAAGCATTCTCAGAACTCTTTGTGATGTTGAGTTTCAACTCACAGAGTTGAACCTCTTTGTATAGAGCAGTTTGAACACTCTTTTGTAG   |
| HOR_W_5_2   | AATCTGCAAGTGGATATTTGGACCTCTCTGAGGATTTCTGTTGAAAACGGGATAAATCTTCCACATAAAAAATAGACAGAAAGCATTCTCAGAACTCTTTGTGATGTTGAGTTTCAACTCACAGAGTTGAACATCCCTGTGATGAGCAGTTTGAACACTCTTTTGTAG    |
| HOR_W_5_3   | AATCTGCAAGTGGATATTTGGAGCCTCTCTGAGGATTTCTGTTGAAAACGGGATAAATCTTCCACATAAAAAATAGACAGAAAGCATTCTCAGAACTCTTTGTGATGTTGAGTTTCAACTCACAGAGTTGAACCTCTTTGTATAGAGCAGTTTGAACACTCTTTTGTAG   |
| HOR_W_5_4   | AATCTGCAAGTGGACATTTGGAGCGCTTTGAGGCTGTTGGTGGAAAAGGAAATATCTTCCACATAAAAAATAGACAGAAAGCATTCTCAGAACTCTTTGTGATGTTGAGTTTCAACTCACAGAGTTGAACCTCTTATAGAGCAGTTTGAACACTCTTTTGTAG         |
| HOR_W_5_5   | AATCTGCGATTGGAGATTTGGAGCCTTTGAGGCTACTGTAGTAAAGGAAATAAATCTTCCATAAAAAATAGACAGAAAGCATTCTCAGAACTCTTTGTATGATTTGGATTGAACATCAACAGAGTTGAACATCCCTTTGTATAGAGCAGTTTGAACACTCTTTTGTAG    |

**Table S2. List of alphoid monomer sequences used for monomer-encoding of long reads.**  
DNA sequence of 14 genomic monomers and 44 chromosome-specific monomers used in this study.

| Family | Group | Name | Accession  |
|--------|-------|------|------------|
| 2      | B     | D1   | AJ130751.1 |
| 2      | A     | D2   | AJ130752.1 |
| 1      | A     | J1   | AJ130753.1 |
| 1      | B     | J2   | AJ130754.1 |
| 4      | A     | M1   | AJ130755.1 |
| 5      | B     | R1   | AJ130756.1 |
| 5      | A     | R2   | AJ130757.1 |
| 3      | B     | W1   | AJ130758.1 |
| 3      | B     | W2   | AJ130759.1 |
| 3      | B     | W3   | AJ130760.1 |
| 3      | A     | W4   | AJ130761.1 |
| 3      | A     | W5   | AJ130762.1 |
| *      | *     | A    | AJ131207.1 |
| *      | *     | B    | AJ131208.1 |

**Table S3. List of 14 generic monomers and their Accession IDs used in this study.** Accession IDs in the Sequence Read Archive of publicly available reference sequences for 14 generic monomers, along with their assignment to suprachromosomal families, evolutionary groups, and canonical names.



## List of Supplementary Data:

### **Supplementary Data S1. Summary of variant HORs detected.**

The number (before any normalization) of detected variant HORs (i.e., HOR-SVs) in each sample. Here are four sheets each corresponding to the chromosome 11, 1, X, and 17.

### **Supplementary Data S2. Local enrichment of variant HORs.**

Frequencies of 2-mer, in which the variant appears sporadically (S) or tandemly (T), were tested against the null model where they existed randomly according to the frequency of the variant themselves. Comparisons where the statistical significance was attained are colored in red. Left: 13-mer variant (13m9-13) in chr17, Right: 6-mer variant (6m1) in chr11

### **Supplementary Data S3. Summary of SNVs observed.**

The summary of SNVs among canonical HOR copies in each sample. The relative frequencies and basic statistics for each SNV (position and alternative base) are shown. Here are four sheets each corresponding to the chromosome 11, 1, X, and 17.

### **Supplementary Data S4. Analysis of paralogous SNVs on canonical HORs.**

Here are two sheets according to how SNVs were counted.

Unique sites = SNVs are counted only once if they were detected in any of samples (with CLR reads).

Total sites = SNVs are counted according to the number of samples where it was detected.

For example, pSNV was counted as "10" sites if the SNV was detected in 10 samples. Each sheet contains four parts for the chromosomes 1, 11, 17, and X.

Here, we assumed substitution error rate was 9% in total (i.e., 3% for each alternative base), and we used the observed number of alternative base to perform binomial test. The resulted p-values were adjusted by multiplying them with the approximate number of tests for the HOR: (3 alternatives) \* (171 bp / monomer) \* (length of HOR unit in monomers). Specifically, these adjusting factors were 5643, 2565, 8208, and 6156 for 11mer(chr1), 5mer(chr11), 16mer(chr17), and 12mer(chrX), respectively. Finally, we detected paralogous SNV if the adjusted p-value was less than 0.01.

In the tables of detected variants,

Rows = 2-mer contexts of the variant (the first base is to be substituted)

Columns = Alternative bases. The latter columns represent counts normalized by frequency of 2-mer in the original sequences. The transitions (A/G, G/A, C/T, or T/C) are boxed to be contrasted with the transversion (other types of substitutions).
